# Supplementary material for: The copy-number and varied strengths of MELT motifs in Spc105 balance the strength and responsiveness of the spindle assembly checkpoint
Source: eLife. 2020 Jun 1;9:e55096. doi: 10.7554/eLife.55096 (PMC7292645; doi:10.7554/eLife.55096)
Supplement: Figure 1—figure supplement 1—source data 1. [file elife-55096-fig1-figsupp1-data1.xlsx]

## Sheet: A
	DMSO		Nocodazole
	3h	4h	3h	4h
WT	0.116895	0.129781	0.25661	0.34569
#2	0.192725	0.158844	0.33846	0.375514
#4	0.143429	0.170045	0.506416	0.593792
#4MELT	0.124027	0.098538	0.232637	0.238787
#6	0.197076	0.17105	0.335683	0.377243
Spc105-6A	0.245561	0.224355	0.533223	0.62573
