# Supplementary material for: The copy-number and varied strengths of MELT motifs in Spc105 balance the strength and responsiveness of the spindle assembly checkpoint
Source: eLife. 2020 Jun 1;9:e55096. doi: 10.7554/eLife.55096 (PMC7292645; doi:10.7554/eLife.55096)
Supplement: Figure 1—source data 1. [file elife-55096-fig1-data1.xlsx]

## Sheet: 1C right top
WT_1	WT_2		#2		#4_1	#4_2		#6_1	#6_2
0.919893	0.486688		0.490365		0.385004	0.528236		0.751449	1.01905
1.25337	2.23019		0.571941		0.272056	0.397237		0.708766	0.586621
1.47062	1.47935		0.384792		0.27211	0.176576		0.742129	1.59814
1.39074	1.49371		0.444374		0.210257	0.22226		0.351742	0.13349
0.257904	0.434309		0.72432		0.262282	0.251681		0.147181	1.38618
0.333853	0.695327		0.629652		0.380181	0.399515		0.144569	1.06279
0.635044	0.796834		0.669745		0.400021	0.292378		0.227165	0.488629
2.79599	0.36241		0.695077		0.381088	0.54088		0.55879	0.125496
1.06245	0.962563		1.15072		0.152761	0.221702		0.199097	0.259035
1.49561	1.13174		0.726444		0.09469	0.089032		1.0948	0.362717
1.17341	0.643167		0.406691		0.166483	0.574693		0.814269	0.159073
1.83978	0.501015		0.360297		0.133006	0.262489		0.699966	0.339745
1.32657	1.92612		0.780969		0.478853	0.105183		0.318667	0.805105
1.36995	1.33035		0.560474		0.350815	0.332849		1.55324	0.385798
1.34319	0.54537		0.379055		0.294145	0.387049		2.04019	0.795674
0.550819	1.01401		0.440484		1.24634	0.268339			0.520291
1.6806	0.805429		0.92449		0.280281	0.293139			0.513703
0.876303	0.806733		0.269907		0.148867	0.105346
2.41527			0.548659		0.104503	0.04995
0.484367			0.599044		0.457855	0.098136
0.629081			0.339192		0.201172	0.180896
0.927358			0.561907		0.077575	0.350329
0.336856			0.951462		0.190569
1.04692			0.936902		0.484537
0.3226			1.49097		0.23971
0.298592			0.908096		0.554907
0.556317			0.351766		0.196222
0.879895			0.69706		0.521488
0.943335			0.320621		0.394223
0.597428			0.620816
0.696924			0.68695
0.680552			0.485726
0.999882			0.400873
1.41122
0.527294
1.24821
0.57356
0.486688
2.23019
1.47935
1.49371
0.434309
0.695327
0.796834
0.36241
0.962563
1.13174
0.643167
0.501015
1.92612
1.33035
0.54537
1.01401
0.805429
0.806733

## Sheet: 1C right bottom
WT_1	WT_2		#4_1	#4_2		#4_MELT_1	#4_MELT_2
0.919893	0.486688		0.385004	0.528236		0.705143	0.800425
1.25337	2.23019		0.272056	0.397237		0.517344	1.02211
1.47062	1.47935		0.27211	0.176576		0.559941	0.879554
1.39074	1.49371		0.210257	0.22226		0.301551	0.489372
0.257904	0.434309		0.262282	0.251681		0.164401	0.565828
0.333853	0.695327		0.380181	0.399515		0.231214	0.962398
0.635044	0.796834		0.400021	0.292378		0.561112	1.52328
2.79599	0.36241		0.381088	0.54088		1.66452	1.70699
1.06245	0.962563		0.152761	0.221702		0.540039	1.35987
1.49561	1.13174		0.09469	0.089032		0.535062	1.03394
1.17341	0.643167		0.166483	0.574693		1.30552	1.08811
1.83978	0.501015		0.133006	0.262489		2.4486	0.293226
1.32657	1.92612		0.478853	0.105183		1.0808	0.829688
1.36995	1.33035		0.350815	0.332849		0.434199	0.73149
1.34319	0.54537		0.294145	0.387049		0.243572	1.40488
0.550819	1.01401		1.24634	0.268339		0.957897	1.09693
1.6806	0.805429		0.280281	0.293139		0.624083	0.514546
0.876303	0.806733		0.148867	0.105346		0.620221	1.01629
2.41527			0.104503	0.04995		0.190085	0.596145
0.484367			0.457855	0.098136		0.49508	0.88921
0.629081			0.201172	0.180896		0.509524	0.439422
0.927358			0.077575	0.350329		0.264681	0.591216
0.336856			0.190569			0.691249	0.32551
1.04692			0.484537			1.65455	0.840685
0.3226			0.23971			0.874406	0.951652
0.298592			0.554907			0.878775	0.59083
0.556317			0.196222			0.811657
0.879895			0.521488			1.66338
0.943335			0.394223			0.856593
0.597428						0.405114
0.696924						0.957832
0.680552						0.642141
0.999882						0.34052
1.41122						0.314528
0.527294						0.375361
1.24821						0.543732
0.57356						0.639201
0.486688						0.671128
2.23019						0.198422
1.47935						1.76884
1.49371						1.16695
0.434309						1.79271
0.695327
0.796834
0.36241
0.962563
1.13174
0.643167
0.501015
1.92612
1.33035
0.54537
1.01401
0.805429
0.806733
