# Supplementary material for: The copy-number and varied strengths of MELT motifs in Spc105 balance the strength and responsiveness of the spindle assembly checkpoint
Source: eLife. 2020 Jun 1;9:e55096. doi: 10.7554/eLife.55096 (PMC7292645; doi:10.7554/eLife.55096)
Supplement: Figure 2—figure supplement 1—source data 1. [file elife-55096-fig2-figsupp1-data1.xlsx]

## Sheet: A
Time		WT_1	WT_2	WT_3		#2,6_1	#2,6_2	#2,6_3
45		0	0.007	0		0.0029	0.0139	0.0076
75		0.004	0.006	0		0.0823	0.0708	0.0673
105		0.006	0	0		0.0558	0.0387	0.0501
