# Supplementary material for: The copy-number and varied strengths of MELT motifs in Spc105 balance the strength and responsiveness of the spindle assembly checkpoint
Source: eLife. 2020 Jun 1;9:e55096. doi: 10.7554/eLife.55096 (PMC7292645; doi:10.7554/eLife.55096)
Supplement: Figure 2—figure supplement 2—source data 1. [file elife-55096-fig2-figsupp2-data1.xlsx]

## Sheet: B_top right 
time (min)		WT	WT_2		#2,6_1	#2,6_2
105		0.0985	0.13441		0.33407	0.4421
135		0.28421	0.35433		0.5	0.5

## Sheet: B_bottom right 
time (min)		WT			#2,6
105		0.0072			0.06398
135		0.0063			0.0315
