# Supplementary material for: The copy-number and varied strengths of MELT motifs in Spc105 balance the strength and responsiveness of the spindle assembly checkpoint
Source: eLife. 2020 Jun 1;9:e55096. doi: 10.7554/eLife.55096 (PMC7292645; doi:10.7554/eLife.55096)
Supplement: Figure 2—figure supplement 3—source data 1. — Individual pages were created in this file for each subfigure. [file elife-55096-fig2-figsupp3-data1.xlsx]

## Sheet: A_top
WT	BPM	#4-6, BPM_1	#4-6, BPM_2	#1-3, BPM_1	#1-3, BPM_2
2.28058	2.26311	0.82813	2.14332	0.530074	0.84717
1.47956	1.45811	1.54282	0.948991	0.986011	0.755255
1.9637	0.745129	0.93813	1.45804	1.60516	1.36283
1.17485	1.33997	1.08204	1.29197	0.876997	0.741986
1.34954	1.05837	0.159938	1.42504	1.08447	1.21425
0.891991	0.540879	0.877516	0.734349	1.29279	1.26954
1.03129	1.23423	1.21467	0.818389	0.682137	0.635528
0.977522	0.533632	0.799986	0.926759	1.17215	0.530381
1.04551	0.963821	0.485611	1.45498	0.6598	0.354912
0.773556	1.22624	0.515412	2.1442	1.06652	0.51499
1.59452	1.37261	0.241834	0.947666	1.0688	0.33564
2.22584	0.808592	0.458699	2.57234	0.617553	0.482309
1.14418	1.0393	0.594654	1.7404	0.914712	0.839496
0.632872	0.342267	0.529958	1.43477	0.90442	0.543781
1.10763	0.748766	0.834877	0.884786	0.890196	0.457589
1.24363	0.522913	0.209158	1.21492	0.66684	1.30244
1.10843	1.15676	0.533473	1.0046	1.13063	0.557556
0.461408	0.304496	0.590331	0.823179	0.923895	0.557488
1.13872	1.07437	0.607844	0.918669	1.6471	0.328268
1.70873	1.2594	0.217799	0.754421	0.53765	0.561472
0.998943	2.90347	0.353406	1.62359	1.6565	0.747623
0.712802	2.35981	0.51169	2.22574	1.4573
2.18175	1.16694	0.872739	1.47089	0.756313
1.36642	1.5361	0.687608	1.04036	0.930098
0.83043	1.00592	0.491099	0.89437	1.11897
0.931738	0.734258	0.738032	1.02326	0.459152
0.922135	1.43701	0.372681	1.82547	1.57624
2.2394	1.9504	0.175686	1.35972	1.0073
1.68098	0.771881		0.656793	0.899393
1.58934	2.78319		1.50737	1.58893
0.730224	1.75402		0.93317	0.955827
1.74232	1.29592		1.03472	0.864461
0.866023	1.16104		0.635366	0.689197
0.658176	1.50037		1.01846	1.17996
1.10755	1.14184		1.31066	0.949363
2.54549	0.901333		1.08316	1.26963
1.72442	0.745177		0.469159	1.07425
1.76062	0.909063		0.430629	2.13387
1.75273	0.592435		0.870391
1.31398
1.38804
1.00549
0.657608
0.736634
0.293745
1.25028
0.626213
0.794901
0.666837
0.54199
1.34999
0.608611
1.21869
0.540334
0.666926
0.618866
1.1191
0.862841
0.835399
1.26645
1.05484
0.579417
0.576554
3.15683
0.558296
1.24072
0.747443
1.41719
1.2003
1.10585
0.683647
0.795398
0.439307
0.29751
0.705469
0.460461
1.06427
1.79034
0.969523
1.22383
0.618638
0.389051

## Sheet: C_right top
#4-6,BPM	#1-3, BPM
0.0258	0.632

## Sheet: C_right bottom
#4-6in1-3, ABPM	#1-3in 4-6, ABPM
0.2556	0.80208

## Sheet: D_right top
#4-6_1	#4-6_2	#1-3_1	#1-3_2
167.5	76.417	236.028	408.75
57.389	93.888	96.473	408.972
159.389	217.167	19.805	312.639
112.083	107.056	222.056	240.278
74.028	71.722	94.778	363.334
90.778	91.944	133.695	296.444
135.445	115.111	143.667	93.111
40.667	112.555	382.389	179.555
73.195	91.25	300.223	305.139
119.361	126.584	198.222	141.5
73.445	91.222	149.556	319.722
91.944	43.306	170.056	275.528
	100.25	195.306
	101.528	293.139
		284.555
		236.639
		169.861
		154.945
		130.75
		143.472
		118.5
		209.778
		203.166
		222.5
		455.583
		263.527

## Sheet: D_right bottom
#4-6BPM	#1-3BPM
0.3609	0.6547
