# Supplementary material for: The copy-number and varied strengths of MELT motifs in Spc105 balance the strength and responsiveness of the spindle assembly checkpoint
Source: eLife. 2020 Jun 1;9:e55096. doi: 10.7554/eLife.55096 (PMC7292645; doi:10.7554/eLife.55096)
Supplement: Figure 2—source data 1. — Individual pages were created in the excel file for each subfigure. [file elife-55096-fig2-data1.xlsx]

## Sheet: 2A_left
Time		WT_YPD		WT_ben_1	WT_ben_2
45		0.2046		0.039	0.0672
75		0.5555		0.1456	0.1486
105		0.211		0.161	0.20197

## Sheet: 2A_middle
45min	75min
6.50054	4.95346
3.58062	1.54285
5.65941	7.85022
1.71195	2.93062
3.94537	3.50918
3.32817	1.08794
3.11367	1.41218
9.0154	3.18987
5.84332	7.84789
1.66614	0.889008
7.83182	1.30458
4.10502	6.53835
13.6865	10.7555
0.687121	9.39792
8.88242	0.365056
5.33684	5.85651
9.94167	3.09814
1.42189	15.6209
5.33692	9.43498
5.69497	2.20203
15.8016	3.03963
15.88	7.45416
2.15437	5.72549
2.11204	6.33565
3.0319	4.85934
6.86479	2.95483
5.60059	2.10789
1.17221	0.436192
7.30163	0.64552
4.98048	6.37181
2.50588	0.398688
0.798827	13.2552
5.46018	0.442112
6.53337	12.3808
7.43406	4.62258
6.61575	3.47514
2.35889	12.198
2.83169	6.212
6.85171	13.4199
1.8201	0.283344
2.25591
2.8599
3.61265
2.1074
0.803617
3.59299
1.11695
5.94967
3.63126
10.5183
0.330758

## Sheet: 2A_rightTime
Time		fraction of cells with unattached kinetochores
45		0.29553	0.2379
75		0.3092	0.3412
105		0.5215	0.3611

## Sheet: 2B
time (min)	WT_1	WT_2	WT_3	#2,6_1	#2,6_2	#2,6_3
45	0.0043	0.0095	0	0.038	0.0209	0.0147
75	0.1149	0.1046	0.1322	0.2179	0.1886	0.1853
105	0.123	0.0962	0.1318	0.2473	0.232	0.2699

## Sheet: 2C left
Time (min)	WT	Motif#2	Motif#2,6	Motif#1,2	Motif#1,3	Motif#1,2,3	Motif#4,5,6
0	0.0248	0.0337	0.0441	0.0338	0.1773	0.0263	0.0275
20	0.0296	0.0374	0.0507	0.0396	0.2001	0.031	0.0315
40	0.0346	0.0413	0.0594	0.0463	0.2434	0.0361	0.0353
60	0.0421	0.048	0.0684	0.0543	0.2776	0.0439	0.0415
80	0.0506	0.0543	0.0804	0.0642	0.324	0.0508	0.0487
100	0.062	0.0627	0.0952	0.0759	0.3692	0.0609	0.0585
120	0.074	0.0733	0.112	0.0898	0.416	0.0734	0.0692
140	0.09	0.0848	0.1332	0.107	0.4624	0.0873	0.0828
160	0.1087	0.0986	0.1574	0.1273	0.51	0.1048	0.101
180	0.1321	0.1158	0.1868	0.1507	0.5551	0.128	0.1222
200	0.16	0.1337	0.2192	0.1779	0.6027	0.1513	0.1473
220	0.1922	0.1558	0.2568	0.2083	0.6446	0.1824	0.1778
240	0.2301	0.1804	0.2989	0.2423	0.689	0.2172	0.2128
260	0.2725	0.2089	0.3467	0.2801	0.7261	0.2556	0.2516
280	0.3188	0.2412	0.3921	0.3207	0.7624	0.2982	0.2942
300	0.367	0.2754	0.4417	0.3604	0.796	0.3441	0.3406
320	0.418	0.312	0.4913	0.4044	0.8246	0.3908	0.3866
340	0.4703	0.3514	0.5436	0.446	0.8535	0.4424	0.4371
360	0.5249	0.3936	0.5927	0.4893	0.8778	0.4949	0.489
380	0.5771	0.439	0.6424	0.5302	0.9022	0.5469	0.5381
400	0.6302	0.4841	0.6833	0.5742	0.924	0.5956	0.583
420	0.6756	0.5291	0.7257	0.6163	0.9425	0.6392	0.6243
440	0.7211	0.5782	0.7614	0.6552	0.9583	0.6793	0.6637
460	0.7606	0.6236	0.7949	0.6913	0.9669	0.7144	0.699
480	0.7965	0.6662	0.8247	0.7248	0.9738	0.7482	0.7296
500	0.8283	0.7064	0.8525	0.7533	0.978	0.7797	0.7597
520	0.8581	0.745	0.8761	0.7851	0.9796	0.8069	0.7855
540	0.8839	0.7776	0.8995	0.813	0.9806	0.8293	0.8091
560	0.9097	0.8085	0.9194	0.8383	0.9822	0.8525	0.8287
580	0.93	0.836	0.9377	0.8599	0.9823	0.8729	0.8502
600	0.9506	0.8621	0.9537	0.8817	0.9827	0.8915	0.8669
620	0.9688	0.8867	0.9654	0.9035	0.9833	0.9051	0.8817
640	0.985	0.9088	0.9755	0.9201	0.9834	0.9185	0.8949
660	0.9974	0.9283	0.9828	0.9367	0.9845	0.9275	0.9041
680	1.0093	0.9458	0.9909	0.9492	0.9842	0.9356	0.9119
700	1.018	0.9624	0.9943	0.9578	0.9849	0.9431	0.9173
720	1.0223	0.9774	0.9965	0.9642	0.9853	0.9469	0.9223
740	1.0257	0.9914	0.9992	0.9681	0.9855	0.9498	0.9258
760	1.0302	1.0033	1.0013	0.97	0.986	0.9523	0.9287
780	1.0313	1.0114	1.0031	0.9705	0.9854	0.9537	0.93
800	1.033	1.0175	1.0043	0.9725	0.9859	0.955	0.9318
820	1.0329	1.0223	1.0056	0.9726	0.9866	0.9572	0.9336
840	1.0344	1.0259	1.0069	0.9733	0.987	0.9584	0.9348
860	1.034	1.0281	1.0065	0.9736	0.9882	0.9602	0.9359
880	1.0347	1.0306	1.0078	0.9736	0.9886	0.9607	0.9377
900	1.0351	1.0309	1.0079	0.9745	0.9895	0.9626	0.938
920	1.036	1.033	1.0096	0.9745	0.9901	0.9632	0.9396
940	1.0367	1.0341	1.0109	0.9744	0.9903	0.9641	0.9411
960	1.037	1.0358	1.0119	0.9754	0.9913	0.965	0.9403
980	1.0375	1.0358	1.0129	0.9753	0.9917	0.9668	0.9419
1000	1.0399	1.0374	1.0148	0.978	0.9923	0.9651	0.9415
1020	1.0386	1.0375	1.0152	0.9773	0.9929	0.9681	0.9432
1040	1.0396	1.0383	1.017	0.9777	0.9932	0.9687	0.9445
1060	1.0401	1.039	1.0181	0.9776	0.9944	0.9696	0.9453
1080	1.0405	1.0396	1.019	0.9783	0.9942	0.9703	0.9467
1100	1.041	1.04	1.0191	0.9785	0.9946	0.9712	0.9479
1120	1.0419	1.0417	1.0206	0.9801	0.9955	0.9714	0.9485
1140	1.0418	1.0417	1.0214	0.9799	0.9959	0.972	0.95
1160	1.0426	1.0422	1.0221	0.9812	0.9962	0.9722	0.9507
1180	1.0431	1.0436	1.0227	0.9813	0.9969	0.9736	0.9512
1200	1.0436	1.0444	1.0239	0.9824	0.9976	0.9749	0.9521
1220	1.0448	1.0453	1.0245	0.9831	0.9983	0.9755	0.953
1240	1.045	1.0455	1.0254	0.9837	0.9988	0.9761	0.9538
1260	1.0455	1.0462	1.0261	0.9843	0.9997	0.9768	0.9543
1280	1.0456	1.0471	1.0269	0.9856	0.9997	0.9771	0.9546
1300	1.0457	1.0474	1.0279	0.9854	1.0002	0.9783	0.9553
1320	1.047	1.048	1.0286	0.9865	1.0007	0.9785	0.955
1340	1.0468	1.0482	1.0289	0.9866	1.0009	0.9796	0.9563
1360	1.0474	1.0498	1.0298	0.9872	1.0013	0.9808	0.9557
1380	1.048	1.0503	1.0302	0.9875	1.0022	0.9813	0.9567

## Sheet: 2C right
Time (min)		WT_1	WT_2	WT_3	#2_1	#2_2	#2_3	#2,6_1	#2,6_2	#2,6_3	#1,2_1	#1,2_2	#1,2_3	#1,2,3_1	#1,2,3_2	#1,2,3_3	#4,5,6_1	#4,5,6_2	#4,5,6_3
0		0.0209	0.0241	0.0183	0.029	0.0298	0.0233	0.0282	0.0414	0.0209	0.0268	0.0202	0.0213	0.0229	0.0239	0.0175	0.0182	0.0226	0.0336
20		0.0253	0.0276	0.02	0.0312	0.0338	0.0247	0.0314	0.0437	0.0242	0.0301	0.0224	0.023	0.0265	0.0254	0.018	0.0181	0.0266	0.0354
40		0.0263	0.0324	0.0259	0.0365	0.0394	0.0312	0.0377	0.0484	0.0289	0.0334	0.0273	0.0301	0.03	0.031	0.0206	0.022	0.0317	0.0435
60		0.033	0.0354	0.0305	0.0429	0.0435	0.0348	0.0436	0.0552	0.034	0.0387	0.0303	0.0351	0.0339	0.0359	0.0242	0.0259	0.0372	0.0508
80		0.039	0.0403	0.038	0.0494	0.0493	0.0393	0.0492	0.0618	0.0393	0.045	0.0358	0.0408	0.0399	0.0422	0.0289	0.0298	0.0436	0.0561
100		0.0465	0.047	0.0441	0.056	0.0537	0.0441	0.0554	0.069	0.0452	0.0509	0.0414	0.0474	0.0462	0.0477	0.0334	0.0344	0.0492	0.0644
120		0.0548	0.0541	0.0516	0.0622	0.0598	0.05	0.0627	0.0766	0.0517	0.0568	0.0466	0.0546	0.0529	0.0551	0.039	0.0401	0.0563	0.074
140		0.0628	0.061	0.0589	0.0668	0.065	0.0554	0.0702	0.0859	0.0587	0.0632	0.0528	0.0613	0.061	0.0633	0.0452	0.046	0.0638	0.0857
160		0.0714	0.0692	0.0677	0.0718	0.0707	0.061	0.0788	0.0963	0.0669	0.0706	0.0592	0.0697	0.0693	0.0726	0.0524	0.0526	0.0727	0.0994
180		0.0823	0.0789	0.0784	0.0775	0.0769	0.0657	0.0871	0.1058	0.0748	0.0779	0.0664	0.0784	0.0785	0.0831	0.0604	0.0594	0.0828	0.1138
200		0.0926	0.0887	0.089	0.0837	0.0844	0.0726	0.0959	0.1157	0.0843	0.0851	0.0731	0.0872	0.0866	0.0921	0.0686	0.0657	0.0919	0.1277
220		0.1032	0.0997	0.1019	0.0902	0.0922	0.0795	0.1041	0.1247	0.0933	0.0931	0.081	0.0969	0.0955	0.1023	0.0766	0.0719	0.102	0.1429
240		0.1133	0.111	0.1137	0.0974	0.0996	0.0861	0.1116	0.1337	0.1013	0.1011	0.088	0.1065	0.1033	0.1109	0.0849	0.078	0.1119	0.156
260		0.1236	0.122	0.1258	0.1045	0.1078	0.0928	0.1193	0.1425	0.1093	0.1092	0.096	0.1171	0.1111	0.1204	0.0929	0.0844	0.1215	0.1707
280		0.1334	0.1326	0.1377	0.1118	0.1156	0.1007	0.1268	0.1503	0.1176	0.118	0.1037	0.1276	0.1196	0.1288	0.1008	0.0909	0.1303	0.1837
300		0.1436	0.1429	0.1496	0.1192	0.1237	0.1073	0.1332	0.1584	0.1244	0.1283	0.1125	0.1386	0.1276	0.1376	0.1083	0.0968	0.1403	0.1968
320		0.1531	0.1535	0.1606	0.1264	0.1314	0.1156	0.1403	0.1663	0.1325	0.1383	0.122	0.1504	0.1357	0.1454	0.1151	0.103	0.149	0.209
340		0.1637	0.1641	0.1723	0.1335	0.139	0.1221	0.1472	0.1735	0.1397	0.148	0.1308	0.1621	0.1435	0.1548	0.123	0.1084	0.1586	0.2215
360		0.1749	0.1747	0.1843	0.1409	0.1468	0.1303	0.1533	0.1805	0.1476	0.1582	0.1405	0.1749	0.1516	0.1632	0.1301	0.114	0.168	0.2357
380		0.1859	0.1854	0.1958	0.1472	0.1539	0.1364	0.1589	0.1864	0.1537	0.1689	0.1511	0.1879	0.1598	0.1718	0.1377	0.1195	0.1755	0.2469
400		0.1969	0.1965	0.2091	0.1533	0.1614	0.1441	0.1655	0.1935	0.1601	0.1799	0.1619	0.2024	0.1685	0.181	0.1455	0.1246	0.1838	0.2608
420		0.2079	0.2093	0.2209	0.1596	0.1679	0.1509	0.1709	0.2003	0.1656	0.1924	0.173	0.2167	0.1779	0.1906	0.1533	0.1293	0.1921	0.2727
440		0.22	0.2209	0.2338	0.1647	0.1745	0.1568	0.177	0.2067	0.1726	0.2053	0.1845	0.2301	0.1867	0.2004	0.1615	0.1341	0.2003	0.2856
460		0.2329	0.2349	0.248	0.1705	0.1806	0.1615	0.1832	0.2127	0.1784	0.2177	0.1968	0.2437	0.1957	0.2095	0.1695	0.1395	0.2086	0.2979
480		0.2451	0.2477	0.2609	0.1756	0.1857	0.1685	0.1888	0.2184	0.1843	0.2317	0.2086	0.2597	0.2044	0.2204	0.1783	0.1455	0.2171	0.3101
500		0.2581	0.2615	0.276	0.1801	0.1906	0.1724	0.1934	0.2251	0.1894	0.2445	0.2214	0.2733	0.2146	0.2316	0.1878	0.15	0.2248	0.3239
520		0.2721	0.2749	0.2915	0.1834	0.1959	0.1779	0.2004	0.2311	0.1945	0.2583	0.235	0.2903	0.2249	0.2433	0.1989	0.1552	0.2331	0.3358
540		0.2861	0.289	0.3062	0.1886	0.2005	0.1817	0.2053	0.2367	0.2003	0.2741	0.2486	0.3059	0.2359	0.255	0.2079	0.1592	0.2407	0.3487
560		0.3013	0.3034	0.3222	0.1913	0.2046	0.1866	0.2104	0.2429	0.2063	0.289	0.264	0.3239	0.2467	0.2679	0.2177	0.1638	0.2481	0.3613
580		0.3158	0.3182	0.3387	0.1956	0.208	0.1892	0.2149	0.2472	0.2115	0.3051	0.279	0.3406	0.2581	0.2821	0.2272	0.1683	0.2557	0.3738
600		0.3332	0.3349	0.3552	0.1985	0.2113	0.1937	0.2205	0.252	0.2163	0.3189	0.2937	0.3588	0.2711	0.2945	0.2401	0.172	0.2634	0.3858
620		0.3489	0.3527	0.3743	0.202	0.2159	0.1966	0.2258	0.2578	0.2213	0.3369	0.3091	0.3755	0.2835	0.3094	0.2519	0.177	0.2708	0.3988
640		0.3653	0.368	0.3911	0.2042	0.2189	0.2018	0.231	0.2631	0.2268	0.3523	0.3259	0.3933	0.2976	0.3235	0.2644	0.1824	0.2784	0.4107
660		0.3848	0.3844	0.4092	0.2074	0.222	0.2037	0.2358	0.2686	0.2323	0.3711	0.342	0.4091	0.3093	0.3387	0.2781	0.1856	0.2864	0.4231
680		0.403	0.4028	0.4279	0.21	0.2251	0.2077	0.2412	0.2727	0.2373	0.3885	0.3585	0.429	0.3259	0.3568	0.2916	0.1901	0.2942	0.4349
700		0.4227	0.4216	0.4476	0.2135	0.2283	0.2098	0.2475	0.2793	0.2424	0.406	0.3765	0.4459	0.3416	0.3744	0.3069	0.1943	0.3006	0.4471
720		0.4422	0.4403	0.4657	0.2157	0.2315	0.2143	0.2531	0.2848	0.2486	0.4227	0.3951	0.4665	0.3595	0.3929	0.3231	0.1988	0.3081	0.4596
740		0.4642	0.46	0.4865	0.2177	0.2346	0.2161	0.2593	0.2905	0.2531	0.4432	0.4127	0.4836	0.377	0.4101	0.3371	0.2029	0.3163	0.4737
760		0.483	0.4789	0.5056	0.2193	0.2364	0.2195	0.2643	0.2956	0.2585	0.4611	0.4318	0.5021	0.3944	0.4286	0.3538	0.2081	0.3241	0.4894
780		0.5035	0.4996	0.5296	0.2223	0.24	0.2214	0.2706	0.3012	0.2633	0.4799	0.4493	0.5203	0.4139	0.4518	0.3704	0.2124	0.3334	0.5002
800		0.5211	0.5188	0.5517	0.2237	0.2421	0.2244	0.2765	0.3074	0.269	0.4985	0.4669	0.538	0.4332	0.4733	0.3888	0.2165	0.3413	0.512
820		0.5464	0.5421	0.57	0.2264	0.2451	0.2257	0.2816	0.3135	0.2746	0.5168	0.4867	0.5546	0.4529	0.4955	0.408	0.2206	0.3504	0.528
840		0.569	0.5637	0.5933	0.2276	0.247	0.2288	0.2894	0.32	0.2807	0.5384	0.506	0.5754	0.4741	0.5163	0.4284	0.226	0.3585	0.5381
860		0.5902	0.5873	0.616	0.2302	0.2494	0.2298	0.2956	0.3263	0.2859	0.5577	0.5255	0.5919	0.4923	0.5394	0.4475	0.2302	0.3677	0.5517
880		0.613	0.6087	0.637	0.2302	0.2508	0.2326	0.3023	0.3322	0.2931	0.5771	0.544	0.61	0.5171	0.5658	0.4692	0.2359	0.3771	0.5661
900		0.6377	0.6329	0.661	0.2326	0.2526	0.2337	0.3077	0.3393	0.3003	0.5961	0.5623	0.6288	0.538	0.5879	0.4904	0.2408	0.3885	0.5798
920		0.6624	0.6564	0.6852	0.2334	0.2546	0.236	0.3161	0.3465	0.3072	0.6138	0.5815	0.6474	0.5617	0.6128	0.5107	0.2481	0.3983	0.5933
940		0.6885	0.6806	0.7084	0.2353	0.2573	0.2373	0.323	0.3521	0.3134	0.6347	0.6023	0.6634	0.586	0.6365	0.5354	0.2538	0.4089	0.6077
960		0.7109	0.7061	0.7321	0.236	0.2588	0.24	0.3295	0.3607	0.3205	0.6528	0.6175	0.6819	0.6123	0.6637	0.5584	0.2587	0.4201	0.6229
980		0.7368	0.7286	0.7546	0.2381	0.2599	0.2415	0.338	0.3685	0.3285	0.6719	0.639	0.6987	0.6347	0.6876	0.5818	0.2647	0.4323	0.6345
1000		0.7589	0.7511	0.7781	0.2371	0.2624	0.2457	0.3467	0.3758	0.3378	0.6914	0.6565	0.7173	0.6606	0.7128	0.6085	0.2725	0.4395	0.6478
1020		0.785	0.7784	0.7992	0.2402	0.2636	0.2451	0.3545	0.3839	0.3442	0.7083	0.6758	0.7332	0.6819	0.737	0.6316	0.2783	0.4555	0.6614
1040		0.8077	0.7993	0.8191	0.2412	0.265	0.2465	0.3642	0.393	0.3534	0.7256	0.6925	0.7497	0.7086	0.7614	0.6542	0.2857	0.4669	0.675
1060		0.833	0.8219	0.8398	0.2431	0.2668	0.2469	0.3725	0.4022	0.3617	0.7453	0.7102	0.7651	0.7306	0.7845	0.6728	0.2924	0.4808	0.6887
1080		0.8519	0.8418	0.8561	0.2434	0.2691	0.2494	0.3822	0.4112	0.3721	0.7633	0.7259	0.7845	0.7547	0.8054	0.6954	0.3011	0.4949	0.6979
1100		0.876	0.8629	0.8743	0.2446	0.2699	0.2507	0.3925	0.4205	0.3807	0.7797	0.7452	0.7975	0.7763	0.8282	0.7151	0.3092	0.5086	0.7072
1120		0.8936	0.8799	0.8876	0.2459	0.2728	0.2523	0.4025	0.4312	0.3923	0.799	0.7617	0.8036	0.7984	0.8473	0.735	0.3178	0.5225	0.7137
1140		0.9123	0.8969	0.8992	0.2475	0.2743	0.253	0.4123	0.4419	0.3997	0.814	0.7751	0.8087	0.8172	0.867	0.7521	0.3247	0.5403	0.718
1160		0.9253	0.9079	0.9065	0.2479	0.276	0.2548	0.4248	0.4532	0.4109	0.8235	0.7822	0.8133	0.8359	0.8801	0.7682	0.3363	0.5524	0.7231
1180		0.936	0.9186	0.9128	0.2502	0.2778	0.2552	0.4354	0.4641	0.4214	0.8291	0.7881	0.8163	0.847	0.8914	0.7767	0.3441	0.5717	0.7266
1200		0.9445	0.9254	0.919	0.2507	0.2792	0.2567	0.4477	0.474	0.4326	0.8354	0.7909	0.8195	0.8586	0.9003	0.7865	0.3543	0.5882	0.7318
1220		0.9506	0.9305	0.9227	0.2523	0.2806	0.2578	0.4603	0.4867	0.4444	0.8393	0.7937	0.8197	0.8652	0.9076	0.7938	0.3643	0.6076	0.7328
1240		0.9546	0.934	0.9236	0.252	0.2826	0.259	0.4729	0.4985	0.4563	0.8409	0.7965	0.8231	0.8729	0.913	0.7986	0.377	0.6241	0.7348
1260		0.959	0.9364	0.9266	0.2537	0.2838	0.2605	0.4839	0.5109	0.4687	0.8439	0.7984	0.8242	0.878	0.9184	0.8036	0.3865	0.6424	0.7368
1280		0.9615	0.9391	0.9278	0.2543	0.2862	0.263	0.4989	0.5243	0.4825	0.8464	0.7989	0.8241	0.8829	0.9225	0.8076	0.4001	0.6607	0.7394
1300		0.9628	0.9409	0.9297	0.2554	0.2879	0.2633	0.5114	0.5363	0.4938	0.8478	0.8018	0.8251	0.8857	0.9251	0.8106	0.4121	0.6806	0.7409
1320		0.9648	0.9427	0.9315	0.2559	0.2896	0.2655	0.527	0.5503	0.5088	0.8498	0.8015	0.8274	0.8893	0.9269	0.8132	0.4252	0.6994	0.7419
1340		0.9656	0.9441	0.9326	0.2573	0.2906	0.2663	0.5397	0.5648	0.521	0.8503	0.8023	0.8281	0.8909	0.9295	0.8143	0.4365	0.7211	0.7425
1360		0.9657	0.9462	0.9325	0.2577	0.2925	0.2686	0.5541	0.5797	0.5375	0.8521	0.8028	0.828	0.8939	0.93	0.817	0.4508	0.7388	0.7442
1380		0.9676	0.9469	0.9334	0.2596	0.2945	0.2696	0.5693	0.5932	0.5507	0.853	0.8043	0.8279	0.8949	0.9306	0.8185	0.4649	0.7597	0.7453

## Sheet: 2F
WT	mad1Δ	#4-6
5.8651	42.9378	76.1478
2.05339	60.8974	44.0529
5.464	44.6194	97.95
3.73134	13.6719	216.374
3.73134	28.9672	211.538
3.83632	22.339	123.194
0.750751		135.246
