# Supplementary material for: The copy-number and varied strengths of MELT motifs in Spc105 balance the strength and responsiveness of the spindle assembly checkpoint
Source: eLife. 2020 Jun 1;9:e55096. doi: 10.7554/eLife.55096 (PMC7292645; doi:10.7554/eLife.55096)
Supplement: Figure 3—figure supplement 1—source data 1. — Individual pages were created in this file for each subfigure. [file elife-55096-fig3-figsupp1-data1.xlsx]

## Sheet: A_middle
N	222	455	709	C
-0.74202	-0.03682	0.223616	0.240573	0.376611
0.156594	0.232298	0.503132	0.203249	0.285992
-0.04348	0.288937	-0.0078	0.106513	0.931863
0.591116	-0.30462	0.020194	0.480556	0.636413
0.188677	0.322475	0.563292	0.68351	0.06804
-0.01979	-0.10064	0.089212	1.20748	0.865549
-0.32557	0.36765	-0.37949	0.411425	0.477783
-0.11891	-0.44256	-0.07696	0.424585	2.98612
0.553297	0.199914	0.289728	0.147228	-0.7282
-0.17685	-0.29883	0.699381	-0.19949	0.49341
0.701045	-0.6966	-0.27109	0.485837	0.416907
0.017429	0.033282	0.008282	-0.13861	0.347702
0.018129	0.106438	-0.07371	-0.31454	-0.27277
-0.02673	0.477153	-0.14073	0.365522	0.529557
0.002905	-0.1234	0.266299	0.491838	0.615931
-0.08328	-0.07406	0.11773	-0.16996	1.1943
-0.18769	0.162854	0.050144	1.0763	1.5494
-0.04599	0.354946	0.356392	0.22831	0.854513
-0.0621	-0.35291	-0.26705	0.163557	0.552407
0.231229	0.110743	0.104448	0.477913	0.722067
0.247711	0.16449	0.077909	0.264492	0.016281
-0.24208	0.636013	-0.21711	0.227961	-0.01798
0.242808	-0.16546	-0.11014	0.201675	0.833011
0.128935	0.048637	-0.05013	0.130297	0.771281
0.142302	0.339106	-0.00703	0.265142	0.164851
0.25386	-0.23955	-0.09415	0.397277	0.661433
-0.17789	0.032779	0.194311	0.502207	0.540167
-0.40908	-0.41108	-0.11423	0.715145	0.875368
-0.7586	0.10749	0.076457	0.609519	0.622478
-0.78503	0.433482	-0.31068	0.426887	0.598059
0.237795	-9.5e-05	-0.01201	-0.20586	0.866574
0.121642	0.118062	0.199771	0.179096	0.028627
-0.5302	-0.12018	-0.10444	0.576985	1.10571
0.39724	0.020495	0.045492	0.358028	0.854457
0.133148	-0.34049	-0.06993	0.130637	-0.21819
0.228123	-0.29515	0.285004	-0.27928	0.791689
-0.17504	0.319653	0.122658	0.604719	0.676908
-0.18203	0.014443	0.126884	0.080729	0.749001
0.036504	-0.02595	0.257974	0.843982	1.21559
-0.07659	0.148366	-0.30372	0.335173	1.39507
-0.1284	-0.19556	0.01213	0.224453	0.751698
0.065268	0.467037	-0.49975	0.174231	0.548871
0.327037	0.326712	-0.04952	-0.08856	1.47115
-0.19079	-0.32739	0.233459	0.257527	1.20146
0.296894	-0.21446	-0.09369	0.533923	0.485034
-0.44551	0.036524	0.001035	0.784654	1.13779
-0.20834	-0.11406	-0.38216	1.0691	1.17363
0.569252	0.007856	-0.58183	0.459422	0.76512
-0.03894	-0.21798	-0.26857	0.138508	-0.25344
-0.35412	0.069865	-0.15064	0.014447	1.23799
-0.79109	-0.28351	0.172817	0.489294	1.25343
-0.29156	0.141972	-0.77274	0.766685	0.801326
-0.10922	-0.12235	0.036471	0.325954	0.616696
0.789306	-0.08349	0.061443	0.800482	1.30476
-0.06228	0.145878	0.093699	0.270635	0.389456
-1.00319	0.177973	-0.24624	0.017943	1.05978
-0.25959	-0.01039	0.564522	0.202045	0.651515
0.076187	0.075353	0.293963	0.170446	0.309308
-0.42692	-0.37919	-0.45234	0.337941	1.66497
0.253572	0.357497	-0.1008	-0.05859	0.487682
0.08022	-0.31127	0.11696	0.921455	0.289945
0.28866	-0.24947	0.12531	0.116793	0.474263
-0.0373	0.011324	0.139955	-0.45606	1.16636
0.440608	0.3338	-0.70962	0.043783	0.395935
-0.17722	0.062806	-0.24376	0.278944	1.49724
-0.43815	-0.05525	-0.48906	0.220424	0.705815
-0.12159	0.324526	-0.12564	0.40773	0.753024
0.692874	0.104545	-0.35327	0.342068	0.821396
-0.25303	0.052658	-0.07801	0.064419	1.47877
-0.21992	-0.10703	0.026473	0.720136	0.493154
0.237339	0.002842	0.158417	0.324202	0.665914
-0.68215	0.23812	-0.01555	0.066466	0.758294
0.012832	0.23902	0.021401	0.812532	0.813875
-0.0496	-0.10118	-0.03266	0.378901	0.34778
	0.056118	-0.12315	0.600827	1.65009
	0.036587	0.366009	-0.32964	0.805641
	-0.30751	0.146185	0.232189	1.30641
	-0.10491	0.042831	-0.16076	1.81367
	0.05934	0.218746	0.64551	0.767748
	0.649607	0.087361	0.433853	0.578322
	-0.34025	0.319401	0.151823	0.557914
	-0.38178	0.022342	0.237184	0.368196
	0.174925	0.124608	0.42989	0.401785
	0.280512	0.052127	0.678422	0.758851
	0.011639	0.310973	-0.27626	0.888341
	0.252137	-0.31902	0.55383	1.12409
	0.174778	0.287165	0.652194	0.858013
	-0.33186	0.04075	0.313525	1.22778
	-0.05044	-0.23132	0.402497	1.15473
	0.078083	0.231585	0.433026	0.81034
	-0.21258	-0.06099	0.588546	0.654926
	-0.13101	-0.17515	0.524189	0.160283
	-0.18486	0.011667	0.317575	0.969127
	0.283831	-0.04471	0.846393	0.115284
	-0.10418	0.039036	-0.27466	1.09545
	0.445829	-0.08694	-0.31447	0.774691
	-0.18772	0.439665	0.357109	1.68298
	-0.21063	0.938519	-0.3996	0.159794
	-0.56626	-0.37672	0.210199	1.33853
	0.215393	0.12681	0.042005	2.02377
	0.451843	0.284776	0.317	0.97493
	-0.3105	0.026459	0.93289	0.429409
	0.031706	0.466588	-0.46654	1.02456
	0.278028	0.270924	0.646076
	0.378652	0.100155	0.548275
	0.121746	0.005326	0.280804
	0.340536	0.012193	-0.02128
	-0.02326	-0.34993	0.234079
	-0.14129	0.18654	-0.03467
	0.11818	-0.10178	0.179561
	0.288561	0.259662	-0.13051
	0.874368	-0.25985	0.380016
	-0.08164	-0.03217	0.471882
	-0.58134	-0.05706	0.762115
	-0.11154	0.302536	0.694728
	0.134995	0.08305	-0.25236
	-0.1575	0.086207	-0.09697
	-0.26168	0.099834	0.417791
	-0.3836	0.491923	0.246512
	-0.07593	-0.09171	0.057131
	0.173814	0.366914	0.287262
	-0.17056	0.409711	0.570853
	-0.0708	0.426251	0.120863
	0.394983	-0.40657	-0.19257
	0.444607	-0.58336	-0.63741
	-0.03938	-0.41079	0.055539
	-0.013	-0.52919	0.249126
	0.018227	-0.07799	1.45416
	-0.45875	-0.58214	0.27507
	0.364965	0.019334	0.249126
	-0.10571	-0.1321	0.612662
	0.019784	-0.1309	-0.16993
	0.324007	-0.3041	0.169647
	-0.03205	0.147409	0.264149
	0.201851	0.64726	0.193214
	0.365852	0.268336	0.126409
	0.030003	-0.24634	0.662456
	0.29347	-0.2631	0.579345
	0.185403	-0.32175	0.512056
	0.172342	-0.43097	0.942788
	-0.10171	-0.43549	0.484528
	-0.43726	-0.20165	0.723232
	-0.06354		0.619612
	-0.06915		0.406992
	-0.1227		0.36585
	-0.38622		0.222187
	0.231349		0.418036
	0.003939		0.900836
	-0.11311		0.399437
	-0.00485		0.583086
	0.430118		0.482378
	-0.08691		0.64568
	0.076404		0.188481
	-0.13366		0.393828
	-0.17249		-0.01171
	-0.38733		1.04794
	-0.08022		-0.03855
	0.41984		0.592708
	0.147336		0.314371
	-0.13905		0.483147
	0.082603		0.419787
	-0.35533		0.129662
	0.370227		0.569269
	0.393606		0.838629
	-0.07469		0.309792
			0.406207
			0.365339
			0.94476
			-0.44803
			0.235562
			0.498611
			0.640249
			0.471391
			-0.31372
			1.21275
			0.299458
			0.232787

## Sheet: A_right
N	222	455
-0.11009	0.782591	0.219026
0.13795	0.469226	-0.18654
0.306284	0.744004	-0.1963
0.121416	0.139539	-0.07017
-0.16614	-0.01731	-0.272
-0.11125	0.742957	-0.08696
-0.00838	0.323779	0.261028
0.014736	0.254574	-0.10124
0.114447	0.580513	0.186411
-0.27847	0.407829	0.175923
0.38525	-0.226052	0.065041
0.404279	0.088304	0.009167
-0.04743	0.192083	0.286594
-0.31437	0.108905	-0.05426
0.246357	0.326542	0.172087
0.07662	-0.288585	0.159426
0.095053	-0.325435	0.169591
0.123678	0.163108	-0.03409
0.012385	-0.048861	-0.14904
0.143597	0.608509	0.013737
0.080935	0.099558	0.056172
0.007155	0.566658	0.010627
0.361272	0.494685	0.101682
-0.0582	0.220824	0.109769
0.240591	1.03482	0.104643
-0.01034	-0.112235	-0.19185
-0.11955	0.055102	-0.4214
0.12079	-0.135436	0.402684
0.154736	-0.055041	-0.1005
-0.04048	0.093924	-0.19
0.428489	-0.054799	0.088355
0.109035	0.364546	0.184397
0.147035	0.295601	0.083105
0.115776	0.259895	-0.25391
0.296613	0.448414	-0.32894
0.064772	0.202635	-0.41707
-0.0373	0.276847	0.169584
0.204811	0.19322	-0.09135
-0.07133	0.507577	-0.0273
0.059272	0.143713	-0.21858
0.270742	0.24167	-0.04533
0.174891	-0.098315	-0.06322
-0.16079	0.1886	-0.07652
0.215948	-0.099691	-0.47202
-0.13685	0.065657	-0.24753
0.459298	-0.118462	0.041762
-0.08334	0.226685	-0.11682
0.040126	-0.293194	-0.02221
0.379736	0.221753	0.194717
-0.12592	0.342355	0.111393
-0.37734	0.299192	0.406967
0.232746	0.564896	0.220206
0.025901	0.191601	-0.2833
-0.03518	0.393333	0.031203
0.309102	0.083144	0.084807
-0.04309	-0.058622	0.238982
0.086855	-0.028907	0.11488
0.155655	-0.266532	-0.52159
-0.09662	-0.297923	-0.16448
0.167598	0.23517	0.393733
-0.15124	0.117502	0.061759
0.335208	-0.028853	-0.08134
-0.15434	0.800121	-0.16763
-0.25656	0.19535	0.014162
-0.39786	0.052836	-0.01043
-0.03494	0.460993	-0.14268
-0.21444	0.03015	-0.09934
0.092487	0.2274	0.113252
0.200446	0.428932	-0.03329
0.27972	0.165521	0.304651
-0.14184	-0.288611	0.044154
0.397696	-0.002751	0.394397
7e-06	0.372721	-0.10477
-0.06449	0.161566	-0.2259
0.419272	0.14793	0.062678
0.272758	0.17388	0.266134
0.089806	-0.012935	0.562609
0.254593	0.192738	0.071277
0.457099	-0.288387	0.119858
-0.37205	0.246528	0.209312
0.181435	0.606689	0.104518
0.232762	-0.09453	-0.49472
-0.01195	0.183171	0.017271
-0.17005	-0.023253	-0.46436
0.246353	0.159416	-0.2526
0.17365	0.244442	-0.00523
-0.0126	-0.124771	0.03198
0.033416	-0.021754	-0.01398
0.027791	-0.075753	-0.40726
-0.14848	0.306097	-0.25897
-0.0868	0.005588	0.112417
0.082303	-0.010326	-0.05648
0.027622	0.488579	-0.19284
0.108826	-0.079411	0.062169
0.292856	0.455323	-0.11627
0.160953	0.209735	-0.36406
-0.13184	0.271438	0.488221
-0.19258	0.219109	-0.37925
0.201593	0.327392	-0.14628
0.260892	0.208666	-0.13877
-0.06151	0.103071	0.008786
-0.12984	0.357678	0.010127
-0.10096	-0.086641	0.176564
0.093212	-0.484939	-0.606
0.348089	0.321562	0.03836
0.432992	0.032696	0.251113
-0.04985	0.925263	0.048546
-0.04376	0.762999	0.45979
0.000818	0.226716	-0.03651
0.387583	0.138926	0.071848
0.103696	0.304817	-0.15294
-0.05104	0.642933	0.161838
0.392616	0.052987	-0.10236
-0.11275	-0.078123	0.186136
	0.091884	0.010075
	0.231603	0.241919
	0.406227	0.064047
	0.436131	0.027765
	0.218121	0.107897
	0.100181	-0.00988
	0.089224	0.269346
	0.384807	-0.02491
	-0.161157	-0.3231
	0.366452	0.050787
	0.091298	-0.05616
	0.222593	-0.05853
	0.080717	0.16773
	0.030506	-0.2406
	-0.217162	-0.31845
	0.296103	0.077575
	0.061672	-0.08398
	-0.066982	-0.15249
	0.092054	0.290868
	0.229283	0.336846
		-0.08266
		0.3807
		-0.02796
		-0.28121
		-0.3171
		0.051594
		0.049684
		-0.03605
		-0.03581
		0.160764
		0.029836
		-0.35912
		0.05031
		-0.10149
		0.166972
		0.301894
		-0.19607
		-0.17434
		0.038348
		0.004378
		0.165092
		0.509811
		0.504129
		0.185574
		0.065584
		0.403235
		-0.00829
		-0.3084
		-0.65804
		-0.43212
		0.211442
		0.223392
		-0.01273
		-0.04673
		-0.04807
		0.126523
		-0.09309
		0.299751
		-0.10381
		0.303891
		0.359171
		-0.0667
		-0.17248
		0.123685
		-0.04481
		-0.17915
		0.002011
		0.118285
		0.06478
		-0.04465
		0.22098
		0.084849
		0.024153
		-0.01875
		-0.08421
		0.3903
		-0.05102
		0.014038
		0.071644
		-0.12203
		-0.02107
		-0.06273
		-0.20222
		0.276696
		-0.02459
		0.12703
		0.133362
		0.064493
		0.347374
		-0.21061
		-0.06536
		-0.0174
		0.088499
		0.361479
		-0.1332
		0.133116
		0.366448
		0.036047
		0.054695
		-0.04377
		0.138924
		0.34657
		0.041963
		0.567001
		0.030455
		0.076057
		0.242595
		0.163602
		0.13772
		0.243678

## Sheet: C
Spc34-C+(-PP1)	Ndc80-C+(-PP1)	Ndc80-C+(+PP1)	Spc24-C+(-PP1)	Spc24-C+(+PP1)	Mtw1-C+(-PP1)	Mtw1-C+(+PP1)
9289.43	6368.71	8950.2	11237.2	16314.4	1152.18	6526.44
4479.93	2985.09	14405.4	21798.2	5792	6747.5	5604.71
7052.05	5194.75	7358.83	16878.4	14024	3767.24	5639.64
9611.14	8132.84	2666.35	11418.7	4609.3	3662.07	14608.7
8173.56	6972.4	2896.15	11110.8	7812.5	4548.5	7676.56
5853.05	3637.6	4625.7	12187.5	4216.91	2633	3181.88
12292.9	4214	10249.1	9207.5	2179.67	5983.71	12916.3
4216.59	3639	4473.75	16419.4	7763.08	5794.91	9427.43
4951.04	11152.4	2949.91	10545.7	4003.68	3584.16	10662.8
8291.71	3839.29	5316.68	1913.22	5780.43	5493.8	4524
7316.1	2809.05	6369.94	11354.3	8174.86	1935.08	4976.1
5480.3	3740.13	3334	22420	5971.82	4943.18	3564.23
6888.75	5786.7	10027.3	12763.2	6819.74	2397.57	3245.5
9692.5	3076.27	4284.68	15946	5037.37	5525.15	7341.71
6898.12	4302.43	9162.45	7012.6	5070.84	4796.12	9634
6813.76	3882.5	5422.1	20948.1	4705	10058.1	8147.86
5242.18	4922	11521	13083.1	4676.39	9914.2	3729.45
9988.78	8125.14	8724.15	16874.9	8511.65	3651.45	3475.96
6545.41	3788	9052.8	21013.4	5065.88	2899.52	1825.41
6354.88	2520.5	7439.9	9994.5	7026.25	4587.12	3685.55
8032.43	4985.43	15270.7	9879.5	6201.05	4928	2173.2
7950.71	9253.57	18806.7	15331.7	16805.1	13809.7	24726.4
6190.74	8014.59	3643.5	23830.7	11906.9	1649.47	3637.77
5006.29	3387.35	4804.43	6365.43	4385.68	4842.2	7112.42
8949.3	2208.7	11453	8728.14	9069.05	2965.32	8751.59
7428.91	4727	4047.11	19299.7	5986.88	3545.71	5081.41
3611.36	2850.47	7841	15742.1	6805.88	1807.37	3620.63
6059.55	2534.5	5451.5	4700.55	3844.88	5913.89	6750.68
9055.32	3786.42	10845.2	6405.86	8938.35	15560	4020.14
8467.62	3435.88	8515.25	10422.7	7996.5	11356.8	2939.62
7444.68	8504.75	5767.2	13260	9317.05	8728.59	5677.5
6610.47	7642.05	11850.7	16363.3	4100.53	6012.17	15806.8
3225.24	4565.14	15971.1	7872	5644.1	17250.9	10388.7
7347.35	3481.57	4281.29	4090.14	4998.71	3263.57	8330.4
5764.44	4104.12	9654.24	5898.55	5004.14	6018	10641.4
5231	1581.53	9910.83	10525.7		9442.06	19271.4
6397.41	2671.4	7330.27	22909.4		9690.1	11757.8
5258.05	9579	9379.3	14457.7		14211.1	4531.73
2717.18	5801.5	14826	14731.1		7109.36	16745.9
7371.32	7773.05	13624	23610		3762.55	10280.5
5847.05	9414.75	13261	13482.7		3891.32	11448.4
3130.5	4641.5	4774.77	15477		7337.52	10724.2
	7013.06	5738.55	9064.71		9868.63	8462.43
	9763	11128.1	8942.3		2690.12	6906.31
	7156.7	6163.9	7464.14		11394.7	5310.86
	6752.35	7142.84			4699.89	23251.5
	6650.43	6745.57			10640	18823
	6252.38	8807.53			7577.77	14001.2
	4058.5	5782.5			11393.8	17105.7
	4614.56	11552			12704.3	16492.2
	5999.9	10381.7			7279.52	11967.5
	10833.8	22123.1			6861.5	12671.5
	4192.61	9613.12			6551.62	9102.63
	11327.1	4384.5			7109.86	5100.2
	7541.26	12914			2895.61	6294.07
	7765.38	8079.65			3765.35	4068.86
	7425.14	7761.9			4123.71	8469.15
	5122.87	7906			3702.48	9069.12
	5893.61	12496.1			5903.58	13545.3
	3437.71	10543.6			3697.65	19172.7
	4673.18	7843.42			17469.9	25401
	11286.1	22536.8			11181.3	16688
	9410.13	11290.5			4580.95	10522.7
	7034.47	14285.5			4467.39	12500.3
	4525.6	12734.8			4138.67	10051
	3579.68	7037			6569.68	3436.17
	4124.68	5519.5			6131.5	8096.35
	2567.65	18638.6			2011.52	8278.32
	3545	16346.1			3053.65	12894.2
	5294	4409.3			2394.3	14707
	16493.6	11263			4536.29
	8280	9097.6			3974
	11701.6	11796			4947.4
	4339.5	9488.05			6555.86
		4654.47			8691.09
		10918.5			6220.59
		7176.64			9548.7
		15639			3334.09
		10138.7			15873.5
		10014.9			9133
		6690.36			19639.9
		9712.41			4999.15
		9452.87			6986.08
		12366			14622
		10990.7			6016.1
		11296.2			7607
		11123			4632.37
		6385.15			4768.1
		12339.7			9008.5
		12208
		14231
		11421.8
		3268.14
		9399.71
		4440.74
		6960.5
		10264.7
		6262.2
		7798.7
		11841.4
		8299.14
		6140.57
		5097
		6159.79
		7336.89
		6467.9
		7987.15
		11444.2
		3076
		5641.5
		6878.5
		8811.57
		6751.14
		8972.76
		6505.4
		6863.15
		4320.5
		3208.2
		3041.14
		6011.14
		9523
		3006.29
		6426.8
		11419.5
		2115.35
		4631.59
		9508.71
		11760
		16961.1
		8116.82
		11743.1
		11265.1
		5239.29
		11399.8
		5254.1
		3941.29
		5469.95
		26451.5
		12698.4
		14433.5
		12121.2
		11166.1
		13560.7
		7772.75
		8957.27
		20050.3
		21412.6
		12755.6
		14681.3
		5122.88
		6574.18
		7768.57
		12586.4
		6178.84
		4270.71
		16117.5
		22854.6
		13407.5
		13180.4
		10324.6
		9602.12
		8276.25
		9957.25
		19309.4
		9955.86
		9235
		7229.12
		5845.14
		7194.57
		6093.35
		18847.7
		11923

## Sheet: D
Time (min)	WT_1	WT_2	WT_3		RASA,bub1-T453AT455A_1	RASA, bub1-T453AT455A_2	RASA, bub1-T453AT455A_3	RASA, bub1-T453AT455A_4	RASA, bub1-T453AT455A_5	RASA, bub1-T453AT455A_6
0	0.045	0.0232	0.0146		0.0135	0.0277	0.0576	0.019	0.043	0.0657
20	0.0229	0.0189	0.0191		0.0251	0.0344	0.0352	0.0233	0.04	0.037
40	0.026	0.0258	0.0219		0.0275	0.0285	0.0273	0.029	0.0431	0.0331
60	0.0219	0.0211	0.0262		0.0277	0.0348	0.0344	0.0302	0.0509	0.0413
80	0.0279	0.0279	0.0278		0.026	0.0398	0.0403	0.0327	0.06	0.0463
100	0.031	0.0316	0.0353		0.0276	0.0441	0.0447	0.035	0.0646	0.0508
120	0.036	0.0372	0.0393		0.0314	0.0501	0.0515	0.0391	0.0721	0.0576
140	0.0418	0.0428	0.0447		0.0344	0.0562	0.0558	0.0439	0.0802	0.0645
160	0.0469	0.049	0.0505		0.0389	0.0609	0.0633	0.0484	0.0901	0.071
180	0.0539	0.0554	0.0572		0.0435	0.0675	0.0707	0.0549	0.103	0.079
200	0.0623	0.0643	0.0649		0.0486	0.0756	0.08	0.0605	0.1152	0.0887
220	0.0707	0.0722	0.0731		0.0535	0.0835	0.0888	0.0667	0.1288	0.0978
240	0.0804	0.0814	0.0803		0.0591	0.0921	0.0984	0.0733	0.1419	0.108
260	0.0892	0.0889	0.0879		0.0649	0.1003	0.1071	0.0792	0.1549	0.1176
280	0.0964	0.0968	0.0942		0.07	0.1088	0.1157	0.0857	0.1665	0.1269
300	0.1033	0.1029	0.0997		0.0756	0.1174	0.1245	0.0922	0.1787	0.1358
320	0.1098	0.1084	0.1047		0.0809	0.1266	0.1356	0.0984	0.1908	0.1463
340	0.1161	0.1139	0.1089		0.0866	0.1345	0.1421	0.1045	0.2035	0.1546
360	0.1217	0.1188	0.114		0.0921	0.1428	0.1509	0.1109	0.215	0.1636
380	0.1274	0.1237	0.119		0.0977	0.1515	0.1589	0.1168	0.2266	0.1717
400	0.1333	0.1293	0.1231		0.1033	0.1593	0.1673	0.1235	0.2383	0.1808
420	0.1394	0.1332	0.1278		0.1086	0.1673	0.1756	0.1301	0.2493	0.1885
440	0.1448	0.1382	0.1319		0.1138	0.175	0.1827	0.1344	0.2606	0.1964
460	0.1509	0.1428	0.1363		0.1188	0.1836	0.1908	0.1406	0.2708	0.2047
480	0.156	0.1477	0.141		0.1239	0.1902	0.1986	0.1477	0.2798	0.2141
500	0.1604	0.1531	0.1451		0.1288	0.1978	0.2066	0.153	0.2897	0.2212
520	0.1661	0.1578	0.1497		0.1341	0.2044	0.2124	0.1586	0.2998	0.2297
540	0.1707	0.163	0.1538		0.1397	0.2121	0.2196	0.164	0.3087	0.2359
560	0.1769	0.1674	0.1584		0.1447	0.2184	0.2261	0.1695	0.3191	0.2426
580	0.1828	0.171	0.1616		0.1493	0.226	0.2332	0.1746	0.3274	0.2506
600	0.1879	0.1761	0.1662		0.1538	0.232	0.2409	0.1797	0.3384	0.2587
620	0.1935	0.1813	0.1705		0.1584	0.2405	0.2484	0.1862	0.346	0.2643
640	0.1991	0.1858	0.1745		0.1637	0.2456	0.2547	0.19	0.3553	0.2725
660	0.2035	0.1907	0.1778		0.1698	0.2513	0.2587	0.1969	0.3644	0.2791
680	0.2089	0.1957	0.1821		0.1733	0.2595	0.2658	0.2011	0.3712	0.2852
700	0.2142	0.202	0.186		0.1773	0.2662	0.2728	0.2063	0.3803	0.2909
720	0.221	0.2059	0.1905		0.1816	0.2717	0.2791	0.2111	0.3917	0.2988
740	0.2275	0.2113	0.1951		0.1856	0.2793	0.2865	0.217	0.4007	0.3065
760	0.2329	0.2158	0.1986		0.1919	0.2843	0.292	0.222	0.4105	0.3125
780	0.2386	0.2209	0.202		0.1952	0.2911	0.2982	0.2267	0.4176	0.3193
800	0.2447	0.2249	0.2059		0.2008	0.298	0.3055	0.2329	0.4274	0.3263
820	0.2512	0.2313	0.2104		0.2048	0.3069	0.3131	0.2398	0.435	0.3354
840	0.2571	0.2358	0.2142		0.2091	0.3129	0.3196	0.2452	0.4455	0.3427
860	0.2625	0.2425	0.2193		0.2162	0.3192	0.3252	0.2512	0.4561	0.3501
880	0.2689	0.2483	0.223		0.2192	0.3271	0.3329	0.2557	0.4656	0.3582
900	0.2768	0.253	0.2287		0.2248	0.3351	0.3404	0.2643	0.4774	0.3664
920	0.2834	0.2596	0.2334		0.231	0.3421	0.3473	0.2713	0.4867	0.3745
940	0.291	0.2658	0.2372		0.2355	0.3527	0.3551	0.278	0.4963	0.3831
960	0.2996	0.2716	0.2419		0.2417	0.3605	0.3632	0.2843	0.512	0.3912
980	0.3059	0.2781	0.2472		0.2475	0.3685	0.3726	0.2917	0.5235	0.4013
1000	0.3137	0.2854	0.2529		0.2539	0.3778	0.3807	0.2983	0.5368	0.4104
1020	0.321	0.2915	0.2587		0.2596	0.3895	0.3912	0.3072	0.5444	0.4213
1040	0.3292	0.2972	0.2631		0.2667	0.3975	0.4003	0.316	0.5638	0.4314
1060	0.3378	0.3048	0.268		0.2746	0.4106	0.4089	0.3226	0.5746	0.4406
1080	0.3452	0.3126	0.2738		0.2831	0.4182	0.419	0.3331	0.5917	0.451
1100	0.3547	0.3204	0.2806		0.2875	0.4289	0.4303	0.3404	0.6038	0.4617
1120	0.3646	0.3285	0.2844		0.2981	0.4386	0.4401	0.3509	0.6201	0.4744
1140	0.3736	0.3362	0.2923		0.3041	0.4517	0.4516	0.3578	0.6364	0.4851
1160	0.3848	0.3448	0.2997		0.3137	0.4618	0.4632	0.3701	0.6508	0.4986
1180	0.3948	0.3527	0.3073		0.3197	0.4771	0.4726	0.3808	0.6633	0.5088
1200	0.4049	0.3636	0.313		0.3313	0.4853	0.4839	0.3919	0.6808	0.5205
1220	0.4148	0.3702	0.3221		0.3405	0.4986	0.4944	0.4029	0.695	0.5344
1240	0.4241	0.3781	0.3314		0.3519	0.5116	0.5059	0.4157	0.7091	0.55
1260	0.4361	0.3876	0.3374		0.3581	0.5225	0.522	0.4256	0.7241	0.561
1280	0.4489	0.3983	0.3455		0.3658	0.5403	0.5388	0.4362	0.7352	0.5731
1300	0.4601	0.4076	0.3543		0.3755	0.5532	0.547	0.4477	0.7563	0.5891
1320	0.4733	0.4207	0.3623		0.3885	0.566	0.5598	0.4614	0.7758	0.6015
1340	0.4831	0.4297	0.3724		0.3967	0.5823	0.5731	0.4708	0.7884	0.616
1360	0.4969	0.4406	0.3787		0.4093	0.5936	0.5877	0.4852	0.806	0.632
1380	0.5101	0.4485	0.3912		0.4181	0.6069	0.6035	0.4962	0.8193	0.6454
1400	0.5229	0.4606	0.4013		0.4379	0.6237	0.6177	0.507	0.8352	0.6598
1420	0.5372	0.4718	0.4107		0.4482	0.6351	0.6311	0.5248	0.8547	0.677
1440	0.5522	0.488	0.4194		0.4599	0.6521	0.6443	0.533	0.8647	0.6893
1460	0.5653	0.4967	0.4318		0.4699	0.6634	0.6541	0.5478	0.8843	0.7057
1480	0.5798	0.5096	0.441		0.4711	0.6854	0.6748	0.562	0.8909	0.7176
1500	0.5971	0.5282	0.4495		0.4935	0.6914	0.6819	0.5783	0.9144	0.7323
1520	0.6094	0.5385	0.4652		0.4991	0.7074	0.6964	0.5897	0.9231	0.7463
1540	0.624	0.5514	0.4757		0.5103	0.7239	0.7068	0.5995	0.9359	0.7627
1560	0.6419	0.5649	0.4887		0.5245	0.7377	0.7258	0.6135	0.9504	0.7735
1580	0.6581	0.5853	0.4988		0.5292	0.7523	0.7367	0.6257	0.9637	0.7905
1600	0.672	0.5949	0.5133		0.5466	0.7616	0.7532	0.6384	0.9757	0.8028
1620	0.6875	0.6141	0.5251		0.5559	0.7765	0.7654	0.6533	0.9895	0.817
1640	0.6983	0.6229	0.5424		0.5673	0.7893	0.7776	0.666	1.0011	0.8312
1660	0.7067	0.6405	0.5563		0.5917	0.799	0.7892	0.6785	1.0145	0.845
1680	0.7149	0.6622	0.568		0.5983	0.8186	0.8065	0.6849	1.0226	0.8535
1700	0.7188	0.6697	0.5838		0.6132	0.8256	0.8131	0.6954	1.038	0.8699
1720	0.7245	0.6917	0.595		0.614	0.8403	0.8239	0.6999	1.0466	0.8829
1740	0.7267	0.706	0.6108		0.6136	0.8557	0.8362	0.702	1.0509	0.8947
1760	0.7285	0.7113	0.6298		0.6181	0.8675	0.8578	0.705	1.0554	0.9041
1780	0.7299	0.7235	0.6455		0.6356	0.8667	0.8603	0.7126	1.0668	0.9209
1800	0.7324	0.7391	0.6586		0.6341	0.8727	0.8698	0.7121	1.0693	0.9298
1820	0.7332	0.7435	0.6751		0.6421	0.8741	0.8769	0.7159	1.0736	0.9394
1840	0.733	0.7424	0.6944		0.6379	0.8786	0.8848	0.7159	1.0739	0.9423
1860	0.7346	0.7447	0.7102		0.645	0.8798	0.8893	0.7205	1.078	0.9475
1880	0.7337	0.7482	0.7281		0.644	0.8853	0.8945	0.7127	1.0782	0.9503
1900	0.7332	0.7492	0.7437		0.6319	0.8902	0.8989	0.719	1.0751	0.9517
1920	0.7354	0.7558	0.7509		0.6447	0.8877	0.8961	0.718	1.0801	0.9573
1940	0.7336	0.7502	0.7631		0.6475	0.8868	0.8976	0.7224	1.0831	0.96
1960	0.7339	0.7575	0.7671		0.6435	0.8889	0.9007	0.721	1.0825	0.9598
1980	0.7331	0.7513	0.7748		0.6395	0.8936	0.9049	0.7224	1.0828	0.9596
2000	0.7334	0.7516	0.7793		0.6454	0.8916	0.904	0.7236	1.0845	0.9621
2020	0.7343	0.7523	0.783		0.6403	0.8944	0.9072	0.7243	1.084	0.9631
2040	0.7337	0.7519	0.7854		0.6472	0.8931	0.9063	0.7245	1.0852	0.9653
2060	0.7349	0.7587	0.7847		0.6436	0.8969	0.9092	0.7243	1.0843	0.9669
2080	0.7346	0.7526	0.7885		0.649	0.8932	0.9076	0.7247	1.0869	0.9676
2100	0.7344	0.7587	0.7853		0.6451	0.8973	0.9113	0.7243	1.0856	0.9663
2120	0.736	0.7582	0.786		0.6491	0.8949	0.9117	0.7257	1.0877	0.9683
2140	0.736	0.7522	0.79		0.6539	0.8947	0.9099	0.7269	1.0896	0.9711
2160	0.7366	0.7601	0.7865		0.6504	0.8969	0.9126	0.7258	1.0886	0.9717
