# Supplementary material for: The copy-number and varied strengths of MELT motifs in Spc105 balance the strength and responsiveness of the spindle assembly checkpoint
Source: eLife. 2020 Jun 1;9:e55096. doi: 10.7554/eLife.55096 (PMC7292645; doi:10.7554/eLife.55096)
Supplement: Figure 3—source data 1. — Individual pages were created in this excel file for each subfigure. [file elife-55096-fig3-data1.xlsx]

## Sheet: 3Bleft
Spc34-C+(-PP1)	Ndc80-C+(-PP1)	Ndc80-C+(+PP1)	Spc24-C+(-PP1)	Spc24-C+(+PP1)	Mtw1-C+(-PP1)	Mtw1-C+(+PP1)
0.94366	0.77064	0.393617	0.389474	0.33097	0.150943	0.1229

## Sheet: 3Bright
Spc34-C+(-PP1)	Ndc80-C+(-PP1)	Ndc80-C+(+PP1)	Spc24-C+(-PP1)	Spc24-C+(+PP1)	Mtw1-C+(-PP1)	Mtw1-C+(+PP1)
1.20293	1.86124	1.16482	0.046254	1.02182	-0.92345	-0.04463
1.01889	0.108143	1.49707	-0.08534	0.617915	-0.90391	1.0228
1.24039	1.40521	0.491531	-0.3101	0.225081	-0.8443	-0.37003
0.796417	0.773616	0.665798	-0.28404	0.679805	-0.82378	-0.40814
1.72345	1.66221	-0.32541	0.056352	-0.2899	-0.79023	0.636156
2.48176	2.15407	-0.14723	-0.13941	0.230293	-0.7785	-0.07915
1.51075	1.61759	0.484691	0.385342	0.167101	-0.67459	0.140391
1.02932	1.83713	-0.23485	0.591205	0.185342	-0.63453	-0.26091
0.664495	1.35603	0.48013	0.014658	0.004235	-0.61596	0.338111
1.50195	0.496091	1.10684	0.290554	0.166775	-0.58502	0.049511
0.425733	0.542345	0.20684	-0.37134	0.358958	-0.5798	0.139414
0.498046	-0.09544	0.496743	0.229967	0.328013	-0.56775	0.137459
0.780456	0.1	-0.24951	0.181107	0.00456	-0.55765	-0.69739
1.45114	0.266775	-0.09967	0.345603	0.075244	-0.55375	-1.05147
1.40847	0.217264	0.826059	-0.22606	-0.11987	-0.54951	0.014984
0.877524	-0.35114	1.41629	-0.06254	0.206515	-0.54723	0.377199
-0.14007	0.557003	-0.17818	-0.16384	-0.2987	-0.53648	0.236482
0.125081	0.108143	0.532248	0.242997	0.030945	-0.52117	-0.32932
0.368078	0.565472	0.543648	-0.20293	0.107166	-0.51042	0.108469
0.767101	-0.30651	0.051792	-0.04039	0.253746	-0.49544	0.500651
0.361889	0.12215	-0.20326	-1.07948	-0.40228	-0.49381	0.403583
0.254397	0.355375	-0.27687	-0.36124	-0.10033	-0.49055	0.171661
1.26352	0.107492	0.093811	-0.56645	-0.54137	-0.47264	-0.11466
0.827362	0.132248	0.036482	-0.03062	-0.74593	-0.46319	0.116287
1.51824	0.539088	0.417915	-0.19055	0.078176	-0.43388	-0.51336
1.17948	0.181433	-0.33094	0.182736	0.537459	-0.43127	-0.5101
0.59316	0.378827	0.385993	0.164495	0.081107	-0.42541	0.016287
0.842345	0.427362	0.454072	0.152117	-0.34332	-0.4228	0.603583
1.84886	-0.01792	0.169055	0.545928	0.352443	-0.41987	-0.27915
1.02313	0.991857	0.250489	0.242345	-0.05896	-0.41466	-0.2101
1.9684	0.037134	-0.31531	1.26547	0.045928	-0.41075	0.03127
0.887948	0.399349	-0.04137	0.726384	-0.51531	-0.40456	-0.21987
0.269707	0.191857	0.639739	0.516938	0.409121	-0.39642	0.318241
1.45244	0.697068	0.196417	0.713355	-0.30391	-0.39544	-0.23225
0.465472	0.219218	0.513355	0.25798	-0.66873	-0.39251	0.701303
0.660261	-0.20195	-0.01596	0.414984	-0.53713	-0.38567	-0.00065
1.06515	-0.03713	0.356678	0.78013	-0.52345	-0.37622	0.282085
0.952443	0.267752	0.760912	0.356352	0.525081	-0.34853	0.557655
0.572638	0.436808	1.93876	0.527036	0.447883	-0.33909	-0.31726
1.41922	2.65375	2.71661	0.498697	-0.32345	-0.3316	-0.09088
0.565147	0.564169	0.475244	0.690554	0.95342	-0.32769	-0.05407
-0.26938	1.21107	1.41792	0.207492	0.330619	-0.32573	-0.44919
1.79511	0.580782	0.218567	0.371661	-0.0798	-0.31303	0.112704
1.6342	1.2886	0.517915	0.292834	0.012052	-0.31042	-0.62736
1.443	0.314332	-0.04984	0.264495	0.048534	-0.30814	-0.33876
1.3759	0.064495	0.483062	-0.21792	0.034528	-0.30651	-0.06287
1.29316	0.584365	0.377199	0.330619	-0.89609	-0.30293	0.046906
	0.650163	0.590554	0.016287	0.305537	-0.29479	0.507818
	0.67785	1.32834	-0.06482	0.338762	-0.29316	-0.0684
	-0.00782	1.44169	-0.17915	0.103257	-0.28306	0.053746
	-0.24007	0.359283	-0.01303	0.106189	-0.2645	-0.43941
	0.134853	0.553746	0.056352	0.274919	-0.25896	0.443974
	0.578176	2.79805	-0.10065	-0.02248	-0.257	0.053746
	0.811726	1.74365	0.035831	-0.10651	-0.25635	0.242345
	1.00163	0.1	0.350489	-0.24886	-0.25603	-0.31303
	1.0241	0.401629	-0.24625	0.420521	-0.25179	0.059609
	-0.01401	-0.11792	-0.33844	0.57329	-0.23225	-0.06743
	0.05342	-0.24821	0.456352	0.664169	-0.20391	0.40228
	0.527036	0.022801	0.158958	0.07101	-0.19577	0.001954
	0.624104	0.057003	0.204886	0.078827	-0.17101	0.307818
	0.666775	0.942997	-0.20195	0.102932	-0.16906	-0.08893
	-0.19316	0.485342	0.190879	0.14886	-0.16319	0.247557
	0.477199	-0.57818	-0.00717	0.366124	-0.15049	-0.12182
	0.078827	-0.68371	0.364821	-0.23029	-0.14853	0.125407
	0.275896	0.295765	0.017264	-0.12248	-0.13941	-0.0342
	-0.33648	0.660586	0.171987	-0.3355	-0.13062	0.203257
	0.186319	-0.03453	-0.13388	0.589902	-0.12704	-0.23941
	0.054072	1.1228	-0.04332	0.013355	-0.10912	0.398697
	0.167427	-0.02997	-0.02638	0.217264	-0.10586	0.237785
	0.208469	0.282085	0.369055	-0.08795	-0.08925	-0.47101
	0.309446	-0.05635	0.24886	0.087296	-0.0886	-0.18404
	0.357655	0.059935	-0.08176	-0.6342	-0.0873	-0.15244
	0.903257	0.671336	0.257003	0.214658	-0.08469	0.117264
	0.895765	0.227036	-0.17231	-0.16906	-0.08306	0.134853
	0.230293	-0.82736	0.192508	0.681433	-0.07362	-0.11042
	0.230945	0.09544	0.692508	0.353746	-0.05993	0.442671
	0.020847	-0.60945	0.790554	1.03811	-0.05342	0.128339
	0.605212	0.190554	0.453094	0.441042	-0.04365	0.295765
	0.02215	0.465798	-0.08046	0.531596	-0.04072	-0.19935
	0.214984	-0.0645	0.428664	1.06417	-0.03257	0.25342
	0.454397	0.266124	0.287622	0.359609	-0.03029	-0.29674
	0.256678	0.591205	0.109772	0.242997	-0.02704	0.029967
	0.542671	0.092834	0.092182	0.482736	-0.01596	0.158958
	0.565147	1.09739	-0.41042	0.558632	-0.00879	0.410098
	0.891531	0.627036	0.09316	0.525407	-0.00521	-0.21857
	0.634853	0.458958	0.218567	-0.07231	0.000326	0.003909
	0.063518	-0.01336	0.399023	0.02443	0.001303	-0.18893
	-0.02638	0.478176	0.533876	0.405212	0.002932	-0.08046
	0.25798	-0.56319	0.057329	-0.18013	0.00456	0.012052
	-0.03616	-0.19707	0.331596	0.01987	0.009772	0.396091
	-0.02182	-0.03192	-0.33127	0.158632	0.015961	-0.10945
	0.181433	-0.4645	0.128013	0.310423	0.021824	-0.41824
	0.689577	0.00684	-0.04853	0.133876	0.02899	-0.07068
	0.515309	-0.53062	-0.06906	0.238111	0.04658	0.020521
	0.598697	-0.17264	-1.01368	0.141694	0.059609	0.259935
	0.66873	-0.04691	-0.18306	-0.16938	0.060261	-0.0114
	-0.06775	-0.22671	-0.1	0.158958	0.067101	-0.06482
	1.1316	0.449511	-0.73192	0.359609	0.07101	-0.09609
	0.449186	0.062215	0.010749	0.085342	0.074919	-0.18208
	0.838436	0.09772	0.815961	0.367101	0.07785	0.010098
	0.543974	0.522801	-0.14202	-0.43779	0.079805	-0.14267
	0.877524	-0.21466	0.990554	-0.10228	0.081759	0.070358
	0.379805	-0.18274	0.065147	0.998046	0.104235	0.339414
	0.529316	-0.04169	0.445277	-0.21401	0.105863	0.135505
	2.40163	0.735179	0.093485	-0.29414	0.132573
	2.22997	0.681107	0.550163	0.610098	0.136482
	2.46938	0.291531	0.083388	0.220195	0.154723
	3.37068	0.849186	0.345277	0.288925	0.184691
	2.57818	0.386971	0.515635	0.735505	0.187622
	2.48762	0.319544	0.212378	0.350814	0.189251
	1.94332	0.278502	0.937785	0.543648	0.191857
	1.14658	0.259283	1.0013	0.325407	0.192834
	1.56124	-0.0658	-0.27915	0.099674	0.199349
	3.89218	-0.17492	0.473941	1.05309	0.208469
	0.778176	0.327036		0.30684	0.224756
	0.400651	0.475244		-0.13876	0.228013
	1.03485	-0.28632		1.13062	0.228339
	2.99186	1.17362		0.28241	0.236482
	1.75668	0.57329		0.245603	0.237459
	0.879153	0.191205		0.028013	0.241694
	-0.07524	0.225407		0.128013	0.243974
	2.04756	0.178827		0.090228	0.252769
	1.65505	0.32215		-0.06417	0.267752
	0.533876	1.27329		0.660912	0.273616
	0.62443	0.205863		0.825081	0.276873
	1.23485	-0.08632		0.222801	0.277199
	2.55147	-0.19935		-0.03583	0.277524
	2.35342	0.46873		-0.14495	0.279805
	2.56254	0.436808		0.542671	0.28013
	0.873616	-0.35179		-0.17557	0.280782
	1.71792	0.027687		0.126384	0.28241
	2.0987	0.063192		-0.04397	0.310749
	3.02866	0.134528		-0.16059	0.316287
	0.74658	2.14235		-0.00098	0.352117
	1.6342	1.22964		-0.03844	0.358632
	1.88437	0.327036		0.023127	0.360261
	1.51694	-0.04365		0.160261	0.37329
	1.63225	-0.20977		0.216287	0.378827
	0.578502	0.32899		-0.40456	0.409121
	2.06384	0.598046		-0.57818	0.410749
	1.09349	0.548534		-0.66482	0.41759
	0.491205	-0.39967		0.27785	0.436482
	0.531922	-0.46775		0.010749	0.438436
	1.49544	0.163192		-0.03453	0.448208
	0.558632	-0.16254		0.677524	0.45342
	0.191205	0.990228		0.24202	0.473616
	0.403909	0.635505		-0.0456	0.477199
	2.2443	0.532899		1.06612	0.500977
	2.46938	0.679479		0.540717	0.507818
	2.20814	0.171336		0.398046	0.52215
	0.536156	0.283062		-0.01336	0.526059
	1.20717	-0.1785		-0.03746	0.543648
	1.61433	0.353746		0.66873	0.582085
	1.21564			0.419544	0.588599
	0.928013				0.603909
	1.87394				0.74202
	2.51759				0.755375
	0.874593				0.762866
	0.771987				0.768078
					0.993485
					1.16287
					1.34528
					1.44951
					2.01107
					0.28013
					0.500977
					-0.30293
					-0.54723
					-0.53648
					1.44951
					0.199349
					-0.00521
					-0.49381

## Sheet: 3Cleft
Rap before CDC20 depletion	Rap after cdc20 depletion
0.691953	0.442683
0.551316	0.52285
1.40391	0.194799
1.57717	0.422834
0.909371	0.374981
0.919988	0.356055
0.754885	1.14618
1.01985	0.298815
1.05862	0.369903
0.894291	0.1988
1.08986	0.801662
1.26189	0.385752
0.707186	0.193107
0.370672	0.0735498
0.499154	0.191722
0.536698	0.216495
1.42145	0.900138
0.992153	0.558701
0.630405	0.20757
1.19203	0.184952
1.54116	0.474227
1.27389	0.821973
0.804739	0.104016
0.312971	0.301431
0.201569	0.729343
1.47561	0.240652
0.908755	0.141406
1.08294	0.353747
1.33974	0.537467
0.880289	0.743807
1.58655	0.212648
0.903216	0.157101
0.648254	0.854593
1.8209	0.428527
0.918757	0.497153
0.633328	1.02262
1.72026	0.0923219
1.10463	0.789506
1.50885	0.51808
0.939837	0.151408
1.13725	0.239114
0.285582	0.561163
0.290968	0.144176
1.3499	0.157563
0.581012	0.34513
1.02862
1.28512
1.39191
1.10648
0.861979
1.90429
0.684721

## Sheet: 3C_right
Rap before CDC20 depletion	Rap after cdc20 depletion
1.71249	0.745437
0.727898	0.620526
1.24176	0.636407
1.43446	1.34463
1.98246	1.79592
1.69851	0.594217
1.10784	2.39204
1.74046	1.78052
1.12112	0.749704
0.291064	0.748993
0.212136	1.80517
2.2183	1.38374
1.61982	0.796397
0.575966	0.744726
1.50747	1.11069
1.01944	0.513155
1.22185	1.96326
0.972742	0.687604
0.635222	0.897843
1.40839	0.805641
0.423086	0.051434
0.707514	0.415027
0.892392	0.701588
0.726712	1.65205
1.58331	0.575966
1.72529	0.795686
0.354823	0.326855
0.563641	1.77412
0.923442	0.461484
0.790946	0.99763
0.572174	0.694477
0.716521	0.712491
0.353401	1.19436
2.11022	0.335625
1.91823	0.480683
0.407917	1.10547
1.81489	0.284665
0.763214	0.54539
0.898791	0.619578
0.914909	0.798056
0.667694	0.565063
0.535909	1.02157
0.948092	0.52548
1.20052	0.34155
-0.00687	0.544205
0.594217
0.602038
0.123726
0.174923
0.303389
2.53804
0.710121

## Sheet: 3D
Ask1-C	Ndc80-C
0.9214	0.0909
