# Supplementary material for: The copy-number and varied strengths of MELT motifs in Spc105 balance the strength and responsiveness of the spindle assembly checkpoint
Source: eLife. 2020 Jun 1;9:e55096. doi: 10.7554/eLife.55096 (PMC7292645; doi:10.7554/eLife.55096)
Supplement: Figure 4—source data 1. — Individual pages were created in this file for each subfigure. [file elife-55096-fig4-data1.xlsx]

## Sheet: 4B_bottom left
WT_noc	RASA,mad2Δ_noc	WT_meta	RASA, madΔ_meta
0.901218	0.530058	0.109935	0.546573
0.764099	1.2165	-0.05304	0.98567
1.19051	1.25381	-0.05753	1.1818
2.05106	1.08828	0.143086	0.683777
0.461219	0.973158	0.129077	0.896268
1.68727	0.390702	0.051652	0.921613
0.579836	1.6543	0.100631	0.870174
0.751058	0.807507	0.103091	0.461448
0.510556	0.576443	0.026307	1.19313
0.378321	0.757614	0.053363	-0.40669
1.28646	0.203247	0.057213	0.646669
1.6269	0.501387	-0.11186	0.448508
0.254324	1.10861	0.068656	0.341889
0.257459	2.0631	0.066945	0.441129
0.39076	0.768354	0.019035	0.536092
1.43718	1.20378	-0.09261	0.398139
1.92701	0.369834	0.086194	0.693402
0.551351	0.886283	0.219121	0.863544
0.555173	0.905144	-0.08962	0.364453
0.662218	0.412265	-0.04951	1.06481
0.485986	1.05635	-0.03433	0.610416
0.681799	0.678386	0.119346	0.831462
1.01239	0.406208	0.047588	0.683029
0.849979	0.407917	0.199765	0.698856
0.24723	0.124509	0.159769	0.441878
2.0777	1.42288	0.127152	0.204898
1.39801	1.78849	-0.18383	0.711368
0.769704	0.683173	-0.02449	1.2204
0.773425	0.759956	0.172174	0.78922
0.540677	1.48068	-0.0586	1.83253
0.741983	1.19875	0.103732	0.486686
0.888247	1.56774	0.127687	0.472249
0.570614	0.699887	0.19784	0.757566
1.2128	1.49191	-0.15132	0.518875
0.748094	1.46696	0.322746	0.16779
1.05326	1.34168	0.216234	0.637258
1.47377	1.65332	0.091113	0.415143
1.17179	1.10111		0.33975
0.909454	2.31868		-0.00406
0.706994	0.672695		0.117848
0.527909	0.938627		0.493209
1.55911	1.04225		0.453107
0.901091	1.90925		0.376323
0.683617	1.46694		0.409368
1.01531	1.6095		0.311197
1.26901	1.37099		0.630735
1.46408	1.77538		0.345418
1.19858	1.30121		0.145653
0.846172	0.892564		0.465084
2.05836	0.592824		0.425623
0.89549	0.963717		0.847396
1.74047	1.56138		0.709122
1.01658	0.916085		0.245214
0.792057	1.3123		0.648594
0.863386	0.651695		0.54037
0.70874	0.882812		0.410972
0.454564	0.30286		0.200834
1.91261	0.775165		0.150037
1.7812	0.682265		0.394931
1.02251	0.937738		0.704631
0.760715	0.805684		0.873276
1.16246	0.818075		0.58336
0.963612	0.62095		0.509036
1.68629	0.63704		0.782055
0.940783	1.91867		0.249599
0.708511	1.9006		0.236124
0.945127	0.884488		0.50262
1.70916	1.59509		0.439846
0.988237	2.08951		0.546893
1.29225	0.857392		0.805903
1.79117	0.75613		0.275265
1.01163	1.55857		0.216661
1.98336	1.44199		0.453321
0.709508	0.740761		0.344669
2.01108	0.778329		0.590204
0.715752	1.19537		0.585178
0.971661	0.386113		0.630521
0.750558	0.419141
0.674104	0.922259
0.644658	0.523901
0.607903	0.677267
0.99013	0.579056
0.845724	0.343615
0.975217	0.660229
	0.844829
	0.380975
	0.357643
	0.697001
	0.710328
	0.841146
	1.49465
	0.61721
	1.64017
	0.796033
	1.14858
	0.833641
	0.603371
	0.686718
	0.761181
	0.308019
	1.16841
	0.79954
	0.879598
	1.13376
	0.726578
	0.941838
	1.1674

## Sheet: 4B_bottom right
WT_noc	RASA,mad3Δ_noc	WT_meta	RASA, mad3Δ_meta
1.67787	1.16651	0.157406	0.420529
1.75942	1.12936	0.053827	0.105049
2.33252	1.27401	-0.06024	0.205423
1.25848	0.932783	0.106585	0.226459
0.836812	1.18736	0.094163	0.267798
1.27017	1.20093	0.025244	0.339388
1.60269	0.596195	-0.02725	0.227327
0.891545	1.26883	0.305262	0.715507
0.642747	1.58268	0.085548	0.772873
1.11377	0.886183	-0.27561	0.204888
0.966704	0.721613	0.073394	0.218445
0.424242	1.1158	-0.04995	0.374048
0.568352	0.777729	0.094831	0.599706
0.474222	0.825598	0.047282	0.705957
1.08739	1.25538	0.079338	0.419661
0.282566	0.675678	0.350073	0.263857
1.945	0.773329	-0.00154	0.8653
0.903067	0.924565	0.233071	0.279084
1.44239	0.513726	0.107119	0.156805
1.55896	1.37736	0.172499	0.172633
0.166664	1.13206	-0.12809	0.351743
0.252808	0.982169	-0.29531	1.03292
0.235066	0.719163	0.085348	1.01022
0.385034	0.381517	-0.08308	0.369707
0.184261	0.770834	0.294978	0.23434
0.202514	0.520977	0.151796	0.260184
0.320208	0.718097	-0.16348	0.643649
0.805092	0.884573	-0.49559	0.311941
1.37617	1.07978	-0.0026	0.14051
1.00969	1.13316	-0.09523	0.16896
0.701638	1.38762	0.028249	-0.15714
0.350293	0.427441	-0.1182	0.162882
1.05403	0.778071	0.104047	1.11133
1.24037	0.835028		1.04194
0.531986	1.96611		0.79618
0.187452	1.82892		0.554895
1.02446	0.08862		0.45559
0.688642	2.23347		0.441899
0.985948	0.785036		0.363564
0.438984	1.77522		0.201483
0.194981	0.740984		0.514759
1.24447	0.775602		0.339923
0.851155	1.54287		0.444504
0.869754	0.504015		0.239081
1.03531	1.29161		0.794911
1.24252	0.529549		0.714639
0.813382	0.896754		0.538467
0.921674	1.3398		0.793776
0.638674	0.859461		-0.01302
0.899956	0.180306		0.170162
0.29418	0.407681		0.257914
0.882869	0.491023		0.317751
1.28147	0.918316		0.596901
1.19638	1.5221		0.464205
1.02452	0.835966		0.716509
1.27738	1.18342		0.770669
0.465655	0.791191		0.402097
0.438852	1.04952		0.110391
0.753047	0.836542		0.364565
1.13753			0.225658
1.20789			0.262321
0.621832			0.4037
0.549616			0.114665
0.705016			0.077334
0.62313			0.401296
1.52553			0.029317
0.444217			0.268265
0.737148			0.616936
0.959752			0.381061
0.515814			1.14725
1.50362			0.669494
1.88685			0.538934
0.322228			0.317016
1.54287			0.566181
0.504015			0.314011
1.29161			0.144116
0.529549			0.124149
0.896754			-0.11767
1.3398			0.068586
0.859461			0.134366
0.180306			0.000735
0.407681			-0.11239
0.491023			0.956458
0.918316			0.0575
1.5221			-0.05069
0.835966			-0.02852
1.18342			0.138974
0.791191			0.489582
1.04952			0.252972
0.836542			0.525244
			0.215106
			0.264325
			-0.09236
			0.539669
			0.578069
			0.246294
			0.187659
			0.634433
			0.459463
			0.655603
			0.493589
			0.477828
			0.114532
			0.217043
			-0.14505
			0.069988
			0.100107
			0.637839
			0.162882
			0.445639
			0.60171

## Sheet: 4C_2nd from right
WT		Bub1-T453AT455A
1.85447		0.351491
1.94461		0.31159
2.57803		0.041202
1.39094		0.966718
0.924891		0.528017
1.40386		0.396838
1.77138		0.278616
0.985385		0.329293
0.7104		0.187988
1.231		1.24345
1.06845		1.58077
0.468896		0.129856
0.628174		0.171398
0.524136		0.070205
1.20184		0.192567
0.312308		0.874846
2.14972		0.84216
0.99812		0.635257
1.59421		0.345341
1.72305		0.650107
0.184207		0.858798
0.279417		0.771793
0.259808		0.245734
0.425561		0.455552
0.203656		0.312118
0.22383		0.520446
0.353912		0.935869
0.889832		0.369981
1.52103		0.113548
1.11597		0.835961
0.775489		0.099535
0.387164		0.197114
1.16497		0.297572
2.99243		0.237757
1.37092		0.340528
0.58798		0.684322
0.207183		0.097616
1.13229		0.139652
0.761125		0.611378
1.08972		0.221095
0.48519		0.031583
0.215504		0.178228
1.37546		0.081193
0.940744		0.077158
0.961301		0.18988
1.14428		0.257234
1.3733		0.453093
0.898995		0.035103
1.01869		0.351219
0.705898
0.994681
0.325144
0.975796
1.41635
1.32231
1.13235
1.41183
0.514668
0.485043
0.832309
1.25726
1.33503
0.687284
0.607467
0.779223
0.688718
1.68609
0.490973
0.814736
1.06077
0.570106
1.66189
2.08545
0.356144

## Sheet: 4C_right
WT	bub1-T453AT455A	RASA, bub1-T453AT455A
139.689	134.209	177.599
140.406	131.225	181.016
142.736	124.341	171.332
	149.025	173.604
	155.571	185.478
	138.596	163.337
