# Supplementary material for: The copy-number and varied strengths of MELT motifs in Spc105 balance the strength and responsiveness of the spindle assembly checkpoint
Source: eLife. 2020 Jun 1;9:e55096. doi: 10.7554/eLife.55096 (PMC7292645; doi:10.7554/eLife.55096)
Supplement: Figure 5—figure supplement 1—source data 1. — Individual pages were created in this file for each subfigure. [file elife-55096-fig5-figsupp1-data1.xlsx]

## Sheet: A left
WT	AllMelt
0.28402	0.5555
0.1428	0.5

## Sheet: A right
Time (min)	WT_1	WT_2	WT-3	WT_4	WT_5	WT_6	WT_7	WT_8	WT_9		AllMelt_1	AllMelt_2	AllMelt_3	AllMelt_4	AllMelt_5	AllMelt_6	AllMelt_7	AllMelt_8	AllMelt_9	AllMelt_10	AllMelt_11	AllMelt_12
0	0.007	0.0071	0.006	0.0183	0.0174	0.0128	0.0206	0.026	0.0241		0.0419	0.0241	0.0074	0.0163	0.0253	0.0162	0.022	0.0231	0.0259	0.0146	0.0123	0.0203
20	0.0139	0.0162	0.0165	0.0197	0.0242	0.0092	0.0248	0.0254	0.0232		0.0229	0.0252	0.0205	0.0171	0.0195	0.0134	0.0231	0.0221	0.0361	0.0138	0.0101	0.0269
40	0.0191	0.0191	0.023	0.0242	0.0275	0.0155	0.0296	0.0327	0.0385		0.0165	0.0251	0.0236	0.0124	0.0171	0.0187	0.0245	0.0182	0.0398	0.0161	0.0106	0.0315
60	0.0223	0.0185	0.0275	0.0279	0.032	0.0222	0.0352	0.0395	0.0421		0.0258	0.0281	0.0245	0.0188	0.0203	0.0209	0.0304	0.0263	0.039	0.0172	0.0117	0.0305
80	0.0283	0.0255	0.0304	0.0288	0.0342	0.025	0.0413	0.0464	0.0502		0.0326	0.0311	0.0278	0.0209	0.0249	0.0243	0.0408	0.034	0.0437	0.0245	0.0174	0.0315
100	0.034	0.0286	0.0394	0.0348	0.0416	0.0291	0.048	0.0535	0.0606		0.038	0.0332	0.0301	0.0243	0.0296	0.0278	0.0543	0.0448	0.0528	0.0304	0.0221	0.0346
120	0.0397	0.0317	0.0458	0.042	0.0493	0.0375	0.0564	0.0617	0.0747		0.0425	0.039	0.0393	0.0277	0.0322	0.0292	0.0648	0.0518	0.0654	0.0366	0.0281	0.0407
140	0.0481	0.039	0.0545	0.0484	0.0597	0.0448	0.0662	0.072	0.0924		0.0485	0.0459	0.0461	0.0322	0.0395	0.0369	0.078	0.0627	0.0786	0.0439	0.0339	0.0483
160	0.0567	0.0453	0.0655	0.0582	0.0705	0.0549	0.079	0.0836	0.1067		0.0572	0.0545	0.0534	0.0383	0.0468	0.045	0.0926	0.0745	0.0926	0.0522	0.0401	0.0572
180	0.067	0.0551	0.0781	0.0688	0.0854	0.066	0.0924	0.098	0.1241		0.0685	0.0641	0.0635	0.0457	0.0549	0.0516	0.1087	0.0877	0.1062	0.0605	0.0462	0.0675
200	0.0807	0.0652	0.0953	0.0811	0.1021	0.0789	0.1092	0.1138	0.1451		0.0809	0.0774	0.075	0.0549	0.0664	0.0615	0.1254	0.1018	0.1241	0.0698	0.0533	0.0782
220	0.0975	0.0779	0.1149	0.0984	0.1241	0.0965	0.1277	0.1327	0.1699		0.0968	0.0919	0.0882	0.0658	0.0786	0.0746	0.1445	0.1181	0.1443	0.0808	0.0624	0.0899
240	0.1185	0.0946	0.1396	0.1187	0.1518	0.1173	0.1499	0.1553	0.1977		0.1159	0.11	0.106	0.0791	0.0951	0.0884	0.166	0.1371	0.1681	0.0925	0.0723	0.1029
260	0.1433	0.1155	0.1688	0.1435	0.1819	0.1419	0.1752	0.1819	0.2307		0.14	0.1313	0.1277	0.0956	0.1139	0.107	0.1916	0.158	0.1952	0.1056	0.0833	0.1183
280	0.1717	0.1391	0.2024	0.1718	0.2188	0.1701	0.2042	0.2114	0.2663		0.1655	0.1574	0.1513	0.1151	0.1376	0.1259	0.22	0.1828	0.2266	0.1205	0.0969	0.1364
300	0.2062	0.1686	0.2398	0.2058	0.2611	0.2049	0.2374	0.2443	0.3069		0.1985	0.1848	0.1811	0.1382	0.1646	0.1525	0.2531	0.21	0.2623	0.1383	0.111	0.1576
320	0.246	0.2021	0.2823	0.2432	0.3048	0.2443	0.2726	0.2809	0.3488		0.2343	0.219	0.2126	0.1652	0.1952	0.1835	0.2886	0.2417	0.2996	0.1584	0.1272	0.1826
340	0.2868	0.2404	0.3266	0.2837	0.3499	0.2853	0.3132	0.3191	0.3926		0.2765	0.2569	0.2513	0.196	0.2308	0.2135	0.3275	0.2753	0.3413	0.1831	0.1456	0.21
360	0.3332	0.2804	0.3715	0.3279	0.4008	0.3271	0.351	0.357	0.4348		0.3163	0.2955	0.2895	0.2313	0.2676	0.2479	0.3659	0.3114	0.3832	0.2098	0.1675	0.2426
380	0.3783	0.322	0.42	0.3732	0.449	0.3748	0.3908	0.3976	0.4778		0.3628	0.3347	0.3303	0.2661	0.3085	0.289	0.4047	0.3487	0.4244	0.2395	0.1917	0.2771
400	0.4292	0.3683	0.4654	0.4206	0.5036	0.4219	0.431	0.4362	0.5207		0.4077	0.38	0.3745	0.305	0.3492	0.3278	0.4459	0.387	0.4661	0.2731	0.2202	0.3155
420	0.4755	0.4174	0.5126	0.4701	0.5569	0.4744	0.4706	0.4778	0.5617		0.4558	0.4215	0.419	0.3476	0.3955	0.3729	0.4871	0.4265	0.5067	0.3088	0.252	0.3575
440	0.5248	0.4634	0.5611	0.5191	0.6064	0.5225	0.5112	0.5193	0.5996		0.4982	0.4663	0.4624	0.3911	0.4389	0.4137	0.5225	0.4647	0.5436	0.3448	0.2855	0.3997
460	0.573	0.5124	0.6071	0.5678	0.652	0.571	0.5484	0.5556	0.6377		0.5455	0.5068	0.5079	0.4324	0.486	0.4617	0.56	0.5025	0.5803	0.3822	0.3219	0.4408
480	0.6171	0.558	0.6526	0.6104	0.6959	0.6148	0.5845	0.5895	0.6698		0.5894	0.5519	0.5527	0.4753	0.5275	0.5008	0.5938	0.5383	0.6145	0.4215	0.3562	0.4839
500	0.6583	0.6015	0.689	0.6526	0.734	0.6542	0.6164	0.6208	0.6991		0.6347	0.591	0.5964	0.5159	0.569	0.5431	0.6253	0.5722	0.645	0.4599	0.3945	0.5228
520	0.6987	0.6379	0.7265	0.687	0.7686	0.6884	0.6457	0.6495	0.7268		0.6688	0.6314	0.6332	0.5548	0.6064	0.5809	0.6537	0.6028	0.6719	0.4987	0.4305	0.5616
540	0.7349	0.6734	0.7567	0.7225	0.8009	0.7228	0.668	0.6742	0.7499		0.7079	0.6679	0.671	0.5908	0.6404	0.6167	0.6767	0.6308	0.6946	0.536	0.469	0.5978
560	0.7671	0.7056	0.7887	0.7528	0.8295	0.7518	0.6906	0.6961	0.7689		0.7425	0.6967	0.7047	0.6256	0.6729	0.6459	0.6963	0.6541	0.7139	0.5701	0.5035	0.6303
580	0.7966	0.7373	0.8167	0.7786	0.8565	0.7809	0.7111	0.7151	0.788		0.7722	0.7246	0.7373	0.6526	0.7	0.6772	0.7142	0.6745	0.7329	0.6016	0.5397	0.6608
600	0.8227	0.7642	0.8412	0.804	0.881	0.8042	0.7265	0.7323	0.8038		0.7988	0.7564	0.7639	0.6796	0.7262	0.7025	0.7305	0.6931	0.747	0.6297	0.5723	0.6863
620	0.8482	0.7896	0.8636	0.8272	0.9014	0.8268	0.7401	0.7469	0.8171		0.8275	0.7801	0.7909	0.7034	0.7509	0.7274	0.7438	0.7095	0.76	0.6538	0.6018	0.7107
640	0.8718	0.815	0.8826	0.8496	0.9231	0.8477	0.7535	0.7595	0.8296		0.8519	0.8051	0.8144	0.73	0.7744	0.7489	0.7546	0.7229	0.773	0.6778	0.6289	0.7317
660	0.8924	0.8352	0.9047	0.8699	0.9429	0.8687	0.7646	0.7708	0.8407		0.874	0.8268	0.8382	0.7496	0.7951	0.7705	0.7644	0.735	0.7841	0.696	0.6523	0.7491
680	0.9133	0.8559	0.9233	0.8879	0.9614	0.8855	0.7756	0.7823	0.8502		0.8927	0.8478	0.8581	0.7756	0.8139	0.7897	0.7721	0.7472	0.7929	0.7138	0.6722	0.7639
700	0.9336	0.8727	0.9382	0.906	0.9794	0.9048	0.7848	0.7917	0.8595		0.9146	0.8702	0.8773	0.7915	0.8359	0.8107	0.7802	0.7569	0.801	0.7276	0.6894	0.7774
720	0.9458	0.8867	0.9505	0.9224	0.9958	0.9217	0.7935	0.8007	0.8681		0.9314	0.8857	0.8937	0.8089	0.8534	0.8234	0.7871	0.7649	0.8087	0.7401	0.707	0.7893
740	0.9585	0.9008	0.9589	0.9386	1.0111	0.9364	0.8004	0.8072	0.8753		0.9469	0.9002	0.909	0.8216	0.871	0.8437	0.7936	0.7736	0.8149	0.7511	0.7209	0.7999
760	0.9668	0.9118	0.9688	0.9511	1.0237	0.9504	0.8059	0.8121	0.8808		0.9583	0.9119	0.9206	0.8379	0.8864	0.8593	0.7992	0.7804	0.8197	0.7608	0.733	0.8095
780	0.9723	0.919	0.9739	0.9623	1.0337	0.9618	0.8114	0.8157	0.8851		0.9693	0.919	0.9288	0.8529	0.899	0.8697	0.805	0.7848	0.8244	0.7694	0.7449	0.8187
800	0.9775	0.9237	0.9767	0.9731	1.0414	0.9708	0.8153	0.8194	0.8886		0.9748	0.9264	0.9356	0.8656	0.9097	0.8775	0.807	0.7905	0.8274	0.7782	0.7549	0.8265
820	0.98	0.9294	0.9809	0.9797	1.0478	0.98	0.8176	0.8215	0.8899		0.982	0.9306	0.9405	0.8728	0.9174	0.8882	0.8085	0.7926	0.83	0.7846	0.7631	0.8332
840	0.9827	0.9309	0.9812	0.9852	1.0536	0.986	0.8198	0.824	0.8916		0.986	0.9335	0.9444	0.8799	0.9247	0.8958	0.8109	0.7965	0.8315	0.7918	0.7714	0.8401
860	0.9831	0.9323	0.9824	0.9888	1.0565	0.9906	0.8214	0.8257	0.8926		0.9874	0.9343	0.9483	0.8885	0.9296	0.9005	0.8126	0.7981	0.8321	0.7962	0.7791	0.8452
880	0.9845	0.9327	0.9828	0.9911	1.0589	0.994	0.8222	0.8261	0.8934		0.9868	0.9371	0.9494	0.8904	0.9331	0.9075	0.8144	0.7997	0.8331	0.8008	0.7844	0.8486
900	0.9857	0.9328	0.9834	0.9934	1.0604	0.9953	0.8234	0.8273	0.8948		0.9889	0.9372	0.9506	0.8971	0.9346	0.908	0.8141	0.8011	0.8337	0.8048	0.7893	0.8526
920	0.9871	0.9352	0.984	0.9962	1.0633	0.996	0.8256	0.8278	0.8952		0.9889	0.9392	0.9518	0.9026	0.9369	0.9088	0.8152	0.8014	0.8342	0.8077	0.7918	0.8559
940	0.9872	0.9363	0.9842	0.9976	1.0637	0.9985	0.826	0.8288	0.8962		0.9913	0.9384	0.9539	0.9038	0.939	0.9128	0.8162	0.8025	0.8351	0.8103	0.7947	0.8575
960	0.9886	0.9359	0.9837	0.9997	1.0652	0.9985	0.826	0.8291	0.8967		0.9895	0.939	0.9536	0.9068	0.9403	0.9123	0.8166	0.803	0.8363	0.8112	0.7974	0.8589
980	0.989	0.9375	0.984	1.0005	1.0655	1	0.8269	0.8303	0.8967		0.9905	0.9405	0.9542	0.9066	0.9412	0.9151	0.8169	0.8036	0.8357	0.8118	0.7993	0.8592
1000	0.9889	0.9374	0.9843	1.001	1.0667	1	0.8278	0.8301	0.8981		0.9904	0.9411	0.9543	0.9095	0.9438	0.9148	0.8186	0.8032	0.8369	0.8119	0.7995	0.8598
1020	0.9891	0.9389	0.9851	1.0014	1.0663	1.0005	0.8278	0.8299	0.8978		0.9911	0.9408	0.9558	0.9088	0.9439	0.9176	0.8181	0.8034	0.8371	0.8137	0.8007	0.8607
1040	0.9894	0.9392	0.9856	1.0022	1.0681	0.9994	0.8278	0.8308	0.8986		0.991	0.9417	0.9552	0.9109	0.9453	0.9174	0.8201	0.8047	0.8376	0.8135	0.8009	0.8615
1060	0.9904	0.9399	0.9854	1.003	1.0679	1.001	0.828	0.8314	0.8994		0.992	0.9431	0.9558	0.9115	0.9466	0.9193	0.8211	0.8043	0.8382	0.8155	0.8024	0.8618
1080	0.9903	0.9414	0.9863	1.005	1.0693	1.0013	0.8273	0.8323	0.8992		0.992	0.9428	0.9547	0.9142	0.9475	0.9185	0.8224	0.8051	0.8383	0.8149	0.8039	0.8619
1100	0.9908	0.9415	0.9864	1.0052	1.0693	1.0024	0.8283	0.8323	0.8994		0.9926	0.9422	0.9569	0.9142	0.9484	0.9212	0.8239	0.805	0.8387	0.8156	0.805	0.8624
1120	0.9922	0.9426	0.9864	1.0063	1.0703	1.0023	0.8285	0.8326	0.9002		0.9922	0.9438	0.9554	0.9165	0.9491	0.9209	0.8257	0.8065	0.8396	0.8165	0.8061	0.8632
1140	0.9932	0.9434	0.987	1.0064	1.071	1.0033	0.8298	0.8329	0.9005		0.9938	0.9441	0.9569	0.9163	0.9498	0.9234	0.827	0.8078	0.8396	0.8172	0.8071	0.8635
1160	0.9944	0.9433	0.9866	1.0075	1.0712	1.0029	0.8298	0.8338	0.9012		0.9956	0.9457	0.9566	0.9193	0.9511	0.9221	0.8281	0.8087	0.8404	0.8178	0.8083	0.8645
1180	0.9945	0.9432	0.9873	1.0075	1.0709	1.0033	0.8296	0.8343	0.9019		0.9953	0.9467	0.9584	0.9189	0.9515	0.9237	0.8291	0.8091	0.841	0.8183	0.8099	0.865
1200	0.995	0.944	0.9882	1.0084	1.072	1.0037	0.8298	0.8348	0.9027		0.9964	0.946	0.9581	0.9215	0.9529	0.9239	0.8309	0.8094	0.8411	0.8195	0.8108	0.8653
1220	0.9955	0.9453	0.9893	1.0093	1.0724	1.0042	0.8309	0.8351	0.9031		0.9968	0.9458	0.9598	0.9206	0.9529	0.9256	0.8319	0.8106	0.8416	0.8206	0.8121	0.8658
1240	0.9965	0.945	0.9895	1.0097	1.0734	1.004	0.8311	0.8347	0.904		0.9972	0.9473	0.9591	0.9228	0.9541	0.9249	0.833	0.8106	0.8417	0.8219	0.8118	0.8657
1260	0.997	0.9462	0.9897	1.0106	1.0734	1.0056	0.8311	0.8355	0.9052		0.9982	0.9484	0.9601	0.9222	0.955	0.9274	0.8318	0.8096	0.843	0.8217	0.8131	0.867
1280	0.9977	0.9466	0.9896	1.0112	1.0743	1.0055	0.8318	0.836	0.9054		0.9992	0.9481	0.9602	0.9245	0.956	0.9272	0.8328	0.8103	0.8422	0.8229	0.8125	0.8666
1300	0.9973	0.9471	0.9908	1.011	1.074	1.0065	0.8321	0.8356	0.9062		0.9992	0.9497	0.9613	0.9238	0.9571	0.9296	0.8318	0.8112	0.8431	0.8237	0.813	0.8673
1320	0.9983	0.9473	0.9911	1.012	1.0753	1.0074	0.8322	0.8369	0.9069		0.9998	0.9494	0.9614	0.9258	0.9584	0.9302	0.8326	0.8105	0.8437	0.8244	0.8132	0.8681
1340	0.9983	0.9477	0.9913	1.0122	1.0747	1.0077	0.8328	0.8372	0.9077		0.9988	0.9503	0.9627	0.9249	0.9589	0.9317	0.8303	0.8116	0.8445	0.8256	0.814	0.8683
1360	0.9992	0.949	0.9917	1.0132	1.0755	1.0085	0.8328	0.8377	0.9083		1.0005	0.9501	0.9624	0.9272	0.9604	0.9317	0.8314	0.8119	0.8447	0.8271	0.8143	0.8692
1380	0.9986	0.9503	0.9925	1.0132	1.0759	1.0096	0.8331	0.8387	0.9092		0.9996	0.9503	0.964	0.9271	0.9614	0.9344	0.8252	0.8138	0.845	0.8278	0.814	0.8694
1400	1.0003	0.9506	0.9923	1.0126	1.0762	1.0104	0.8332	0.8389	0.9091		1.001	0.9509	0.9634	0.9263	0.9622	0.9363	0.8249	0.8146	0.8448	0.829	0.8148	0.8695
1420	1	0.9512	0.9924	1.0132	1.077	1.01	0.8338	0.8391	0.9102				0.9647	0.9271	0.9626	0.9377	0.8256	0.8152	0.8457	0.83	0.8155	0.8701
1440	1.0008	0.9515	0.9924				0.8341	0.8397	0.9105				0.9642				0.8264	0.816	0.8456	0.8295	0.8161	0.8702
1460	1.001	0.9521	0.9926				0.8344	0.8401	0.9118				0.9646				0.8251	0.8109	0.8467	0.8308	0.8165	0.8709
1480	1.0012	0.9525	0.9943				0.8346	0.8406	0.912				0.9648				0.8248	0.8112	0.8469	0.8293	0.8164	0.8711
1500	1.0017	0.9528	0.9936				0.8348	0.8411	0.9125				0.9652				0.8218	0.8117	0.8471	0.8301	0.8179	0.8714
1520	1.0026	0.9533	0.9939				0.8356	0.8411	0.9133
1540	1.0018	0.9544	0.9942				0.8356	0.8419	0.9133
1560	1.0043	0.9541	0.9943				0.8352	0.8417	0.9143
1580	1.0039	0.955	0.9948				0.835	0.8424	0.9151
1600	1.0045	0.9553	0.9948				0.836	0.8426	0.9156
1620	1.0032	0.9558	0.9959				0.8359	0.8432	0.9165
1640	1.0057	0.9568	0.9955				0.8363	0.8434	0.9171
1660	1.0048	0.9571	0.9967				0.8362	0.8443	0.9177
1680	1.0053	0.9573	0.997				0.837	0.8447	0.9184
1700	1.0058	0.957	0.9964				0.8369	0.8449	0.9193
1720	1.0063	0.9583	0.9974				0.8375	0.8449	0.9201
1740	1.007	0.9581	0.9966				0.8381	0.8451	0.9214
1760	1.0077	0.9589	0.9969				0.8384	0.8458	0.9212
1780	1.0076	0.96	0.9979				0.8382	0.8459	0.9224
1800	1.0082	0.9602	0.9976				0.8381	0.846	0.9235
							0.839	0.8464	0.9245
							0.8392	0.8472	0.9252
							0.8393	0.8478	0.9257
							0.8395	0.8484	0.9268
							0.8392	0.8488	0.927
							0.8401	0.8492	0.9283
							0.8396	0.8497	0.9287
							0.8404	0.85	0.9299
							0.8413	0.8499	0.9306
							0.8414	0.851	0.9315
							0.8406	0.8509	0.9321
							0.8411	0.8513	0.9329
							0.8416	0.8519	0.9342
							0.8422	0.8521	0.9351
							0.8419	0.8528	0.9358
							0.8427	0.8526	0.9368
							0.8428	0.8533	0.9379
							0.843	0.8532	0.9388
							0.843	0.8541	0.939
							0.8433	0.8543	0.9406
							0.8432	0.8545	0.9407
							0.8439	0.8551	0.9425
							0.8442	0.8557	0.9432
							0.8442	0.8558	0.9438
							0.8446	0.8559	0.944
							0.8444	0.8561	0.9456
							0.8448	0.857	0.9464
							0.8452	0.857	0.9471
							0.8455	0.857	0.948
							0.8457	0.8579	0.9488
							0.8455	0.858	0.9493
							0.8462	0.8587	0.9505
							0.8462	0.8591	0.9511
							0.8466	0.859	0.9517
							0.8472	0.8596	0.9525

## Sheet: B left
Time(min)	WT	WT	WT	WT	WT	WT	WT, prGal1-Bub1	WT, prGal1-Bub1	WT, prGal1-Bub1	WT, prGal1-Bub1	WT, prGal1-Bub1	WT, prGal1-Bub1	ALLMelt	ALLMelt	ALLMelt	ALLMelt	ALLMelt	ALLMelt	AllMELT, prGal1-Bub1_1	AllMELT, prGal1-Bub1_1	AllMELT, prGal1-Bub1_1	AllMELT, prGal1-Bub1_1	AllMELT, prGal1-Bub1_1	AllMELT, prGal1-Bub1_1	AllMELT, prGal1-Bub1_2	AllMELT, prGal1-Bub1_2	AllMELT, prGal1-Bub1_2	AllMELT, prGal1-Bub1_2	AllMELT, prGal1-Bub1_2		AllMELT, prGal1-Bub1_2
0	0.0229	0.0183	0.0265	0.0169	0.0188	0.0172	0.0444	0.0409	0.0376	0.027	0.0273	0.0176	0.0462	0.0414	0.0396	0.0302	0.0339	0.0226	0.0431	0.0418	0.0419	0.0427	0.0721	0.0186	0.0461	0.0383	0.0406	0.0407	0.0305	0.0191
20	0.0214	0.0193	0.0283	0.0174	0.0201	0.0159	0.0212	0.0319	0.0312	0.0188	0.0166	0.0184	0.0308	0.0239	0.0307	0.0217	0.0199	0.0223	0.025	0.0282	0.0248	0.0214	0.0514	0.021	0.0271	0.0263	0.0329	0.018	0.0194	0.0182
40	0.0233	0.0305	0.0294	0.0218	0.0221	0.0219	0.03	0.0311	0.0274	0.0243	0.0222	0.0194	0.0304	0.0219	0.0298	0.0208	0.0254	0.0226	0.0221	0.0245	0.0226	0.02	0.0519	0.0212	0.0247	0.0301	0.0271	0.0173	0.0207	0.0186
60	0.0325	0.032	0.0323	0.0261	0.0301	0.0237	0.0311	0.0278	0.0339	0.0224	0.0192	0.0208	0.0272	0.0285	0.0311	0.0223	0.0214	0.0256	0.0242	0.0294	0.029	0.0193	0.0527	0.0245	0.0319	0.032	0.0304	0.016	0.0247	0.0226
80	0.0325	0.0324	0.0383	0.0264	0.0317	0.0269	0.0296	0.0292	0.0318	0.0223	0.0168	0.021	0.0258	0.0296	0.0313	0.0237	0.0177	0.0288	0.0239	0.0254	0.0241	0.0195	0.0505	0.0259	0.0322	0.0293	0.0307	0.0139	0.0201	0.0248
100	0.0392	0.0387	0.0407	0.0337	0.0382	0.0323	0.0283	0.0381	0.0334	0.0251	0.0177	0.024	0.0346	0.0339	0.039	0.0263	0.0177	0.0331	0.0229	0.0272	0.023	0.0209	0.0511	0.0318	0.0335	0.0272	0.0302	0.0144	0.0197	0.0296
120	0.0431	0.042	0.0473	0.0376	0.0431	0.0342	0.0302	0.0383	0.0363	0.0278	0.0185	0.0291	0.0377	0.0363	0.0379	0.0279	0.0201	0.0376	0.0241	0.0289	0.0244	0.0238	0.0523	0.0309	0.036	0.0291	0.0321	0.0161	0.0205	0.0313
140	0.0477	0.0467	0.0514	0.0435	0.0493	0.0374	0.0331	0.0411	0.0379	0.031	0.0202	0.0297	0.0358	0.0377	0.04	0.031	0.0234	0.0425	0.0248	0.0297	0.0251	0.0243	0.0554	0.0373	0.0378	0.0328	0.0347	0.0174	0.0226	0.0354
160	0.0529	0.0519	0.0528	0.048	0.0553	0.0449	0.0339	0.0438	0.0411	0.0332	0.0218	0.0341	0.0401	0.0392	0.0453	0.0351	0.0263	0.048	0.027	0.0329	0.0272	0.0275	0.0569	0.0399	0.0402	0.0364	0.0374	0.0203	0.0244	0.0396
180	0.0586	0.0574	0.0596	0.0538	0.06	0.0496	0.0385	0.0483	0.0453	0.0368	0.025	0.038	0.0461	0.0444	0.0492	0.0398	0.0295	0.0553	0.0296	0.0345	0.0305	0.0303	0.0602	0.0434	0.0437	0.0363	0.039	0.022	0.0281	0.0435
200	0.0646	0.063	0.0639	0.0591	0.0674	0.0561	0.0422	0.0534	0.0511	0.0411	0.0278	0.0441	0.0519	0.0492	0.0537	0.0454	0.0334	0.0612	0.0323	0.0378	0.0318	0.0341	0.0624	0.0486	0.0477	0.0389	0.0438	0.0244	0.0317	0.0493
220	0.0712	0.07	0.0698	0.0668	0.0734	0.0611	0.0461	0.0584	0.0556	0.0461	0.0307	0.0467	0.0567	0.0546	0.0594	0.0515	0.0379	0.0673	0.0343	0.0403	0.0333	0.0368	0.0659	0.0521	0.0503	0.0428	0.0468	0.0268	0.0351	0.0528
240	0.0796	0.0779	0.0772	0.0749	0.0822	0.0696	0.0504	0.0643	0.0615	0.0515	0.0345	0.0534	0.063	0.0613	0.0668	0.0583	0.0431	0.0742	0.0372	0.0435	0.0363	0.0414	0.0685	0.0582	0.0547	0.047	0.0509	0.0297	0.0381	0.0595
260	0.0891	0.0869	0.0863	0.0849	0.093	0.0784	0.0565	0.071	0.0687	0.0584	0.0401	0.0596	0.07	0.0681	0.0745	0.0655	0.0503	0.083	0.0401	0.0457	0.0391	0.0448	0.0741	0.0645	0.0587	0.0507	0.0554	0.0325	0.044	0.0655
280	0.0983	0.0964	0.0959	0.0937	0.1031	0.0892	0.0627	0.0784	0.0762	0.064	0.0447	0.0672	0.0773	0.0758	0.0828	0.0729	0.056	0.0927	0.0422	0.0492	0.0428	0.0512	0.0773	0.0714	0.0637	0.0554	0.0601	0.0366	0.048	0.0722
300	0.11	0.1079	0.1065	0.1075	0.1159	0.0982	0.0695	0.087	0.085	0.073	0.051	0.0726	0.0863	0.0857	0.0931	0.0814	0.0641	0.1016	0.046	0.054	0.0469	0.0549	0.0836	0.077	0.0682	0.0599	0.0649	0.0399	0.0536	0.0769
320	0.123	0.1197	0.1179	0.1162	0.1285	0.1113	0.0778	0.0963	0.0941	0.0796	0.057	0.0816	0.0958	0.0955	0.1047	0.0911	0.0719	0.1137	0.0499	0.0587	0.0513	0.0622	0.0886	0.0854	0.0741	0.0659	0.071	0.0456	0.0589	0.0843
340	0.1354	0.1324	0.1295	0.1312	0.1414	0.1217	0.0863	0.1064	0.1035	0.089	0.0634	0.0893	0.107	0.1064	0.1161	0.1016	0.08	0.1251	0.0543	0.0639	0.0565	0.0678	0.0947	0.0924	0.0803	0.0715	0.0772	0.0505	0.0647	0.0906
360	0.1487	0.1462	0.1427	0.1424	0.1578	0.138	0.0955	0.1173	0.115	0.0985	0.0707	0.1017	0.1188	0.1189	0.1298	0.1147	0.0895	0.1396	0.0587	0.0694	0.0618	0.0752	0.1006	0.1031	0.0862	0.0779	0.0837	0.0559	0.0708	0.1016
380	0.163	0.1609	0.1568	0.1579	0.1721	0.1478	0.1054	0.1298	0.1269	0.1099	0.0784	0.1089	0.1317	0.1326	0.143	0.1267	0.0995	0.1529	0.0639	0.0755	0.0673	0.081	0.1075	0.1109	0.0943	0.0853	0.0923	0.0613	0.0767	0.1084
400	0.1778	0.1749	0.1711	0.1713	0.1889	0.1624	0.1151	0.141	0.1382	0.1189	0.0868	0.122	0.1433	0.1437	0.1564	0.1393	0.1094	0.1688	0.0678	0.0805	0.0721	0.0891	0.1142	0.1222	0.1011	0.0918	0.0995	0.0678	0.0836	0.1192
420	0.1948	0.1933	0.1876	0.1895	0.2066	0.1767	0.1282	0.1566	0.1531	0.134	0.0971	0.1323	0.1596	0.1609	0.174	0.1557	0.1234	0.1844	0.075	0.0891	0.0802	0.0971	0.1231	0.1317	0.1108	0.1024	0.1105	0.0735	0.0919	0.1287
440	0.2125	0.2097	0.2035	0.2045	0.2263	0.1977	0.1407	0.1713	0.1673	0.1453	0.1078	0.1489	0.1749	0.1762	0.1899	0.1713	0.1366	0.2042	0.0812	0.096	0.0878	0.1068	0.132	0.1467	0.1206	0.1122	0.1214	0.0814	0.1003	0.1435
460	0.2298	0.2272	0.2213	0.2263	0.2446	0.2109	0.1533	0.1863	0.1835	0.1622	0.1183	0.1617	0.1912	0.193	0.2074	0.1882	0.1502	0.2221	0.0886	0.1042	0.0957	0.1156	0.141	0.1579	0.1318	0.1234	0.1328	0.0872	0.1107	0.1551
480	0.2475	0.2457	0.2398	0.2444	0.2623	0.2325	0.1674	0.2021	0.1988	0.1761	0.1285	0.178	0.2076	0.2113	0.2229	0.2054	0.1621	0.2424	0.0961	0.1129	0.105	0.127	0.1505	0.1727	0.1427	0.1345	0.1451	0.0966	0.1197	0.1713
500	0.2666	0.2656	0.2593	0.2622	0.284	0.2485	0.1822	0.2185	0.2149	0.1896	0.1436	0.1926	0.2249	0.228	0.2432	0.2203	0.1799	0.2613	0.1034	0.1226	0.114	0.1376	0.1621	0.186	0.1544	0.1469	0.1566	0.1059	0.1325	0.1845
520	0.2861	0.2853	0.2784	0.2829	0.3016	0.2719	0.1978	0.2352	0.2325	0.2052	0.1542	0.2119	0.2443	0.2466	0.2634	0.2411	0.1915	0.2854	0.112	0.1343	0.1235	0.1505	0.1715	0.2036	0.1679	0.1596	0.1708	0.1168	0.1429	0.2039
540	0.3035	0.3038	0.2955	0.3009	0.3208	0.287	0.2138	0.2518	0.2488	0.2198	0.1693	0.2237	0.2606	0.2637	0.2804	0.2592	0.2106	0.304	0.1201	0.1421	0.133	0.1631	0.1841	0.2148	0.1809	0.172	0.1842	0.1271	0.1568	0.2164
560	0.3249	0.3247	0.3172	0.323	0.3439	0.3112	0.2302	0.2714	0.2672	0.2365	0.1828	0.2452	0.2811	0.2845	0.3033	0.2786	0.2279	0.3278	0.1313	0.1554	0.1462	0.1764	0.197	0.235	0.1961	0.1879	0.2006	0.1385	0.1699	0.237
580	0.3442	0.3448	0.3368	0.3426	0.3637	0.3303	0.2463	0.2891	0.2868	0.2533	0.2012	0.2616	0.3008	0.3043	0.3232	0.297	0.2484	0.3477	0.1421	0.1677	0.1592	0.1906	0.2113	0.2506	0.2116	0.2034	0.2171	0.1508	0.1866	0.2526
600	0.3643	0.3636	0.3551	0.3665	0.3846	0.356	0.2652	0.3085	0.3064	0.2735	0.2131	0.2838	0.3188	0.3246	0.3428	0.3179	0.2616	0.3728	0.1535	0.181	0.1723	0.2034	0.2227	0.2725	0.2263	0.2195	0.2332	0.1638	0.1992	0.2752
620	0.3846	0.3847	0.3768	0.3891	0.408	0.3782	0.2819	0.3284	0.3254	0.2915	0.2313	0.3034	0.3381	0.3441	0.3639	0.3362	0.2826	0.3947	0.165	0.1941	0.1844	0.2178	0.2371	0.2913	0.2428	0.236	0.25	0.176	0.2146	0.2967
640	0.4059	0.4051	0.3944	0.4067	0.4277	0.3974	0.2977	0.3488	0.3437	0.3075	0.2464	0.3231	0.3574	0.3643	0.3849	0.3548	0.3008	0.4147	0.1769	0.208	0.1988	0.2351	0.2524	0.311	0.2595	0.2526	0.2679	0.1923	0.2333	0.3165
660	0.4228	0.422	0.4159	0.4269	0.4458	0.416	0.3175	0.3678	0.3626	0.3259	0.2639	0.3412	0.3772	0.3837	0.4061	0.3763	0.3183	0.4341	0.1894	0.2215	0.2134	0.2503	0.2686	0.3289	0.2739	0.2699	0.2852	0.2072	0.2481	0.3356
680	0.4411	0.4425	0.4336	0.4464	0.4698	0.439	0.3357	0.3859	0.3825	0.3416	0.2801	0.3627	0.3974	0.4016	0.4262	0.3938	0.3336	0.4536	0.2023	0.2365	0.2286	0.267	0.2828	0.3515	0.292	0.2882	0.3036	0.2233	0.2653	0.3592
700	0.4606	0.4621	0.4532	0.4675	0.4862	0.4577	0.3534	0.405	0.4018	0.3634	0.2989	0.3795	0.4158	0.4212	0.4451	0.4136	0.3546	0.4731	0.216	0.2524	0.2442	0.2848	0.2981	0.3711	0.31	0.3073	0.3234	0.2373	0.2842	0.3783
720	0.4771	0.4786	0.469	0.4855	0.5089	0.4769	0.3697	0.4262	0.4213	0.3812	0.3136	0.4003	0.433	0.4395	0.4628	0.4321	0.3708	0.493	0.2308	0.2681	0.2606	0.3022	0.3142	0.3931	0.3292	0.3257	0.3414	0.253	0.3007	0.4011
740	0.4925	0.4962	0.4874	0.504	0.5259	0.4939	0.3893	0.4431	0.44	0.3987	0.3302	0.4175	0.4498	0.4589	0.4803	0.4496	0.389	0.5109	0.2445	0.2844	0.2777	0.3191	0.33	0.4156	0.3467	0.3449	0.3625	0.2709	0.3173	0.4241
760	0.5118	0.5144	0.5055	0.524	0.5439	0.5158	0.405	0.4618	0.4604	0.418	0.3488	0.4378	0.4671	0.4762	0.4986	0.4676	0.4077	0.5295	0.2598	0.3005	0.2937	0.3348	0.348	0.435	0.365	0.3648	0.3813	0.2872	0.3366	0.4487
780	0.5278	0.5329	0.5241	0.5369	0.559	0.5291	0.4227	0.4799	0.4774	0.4338	0.3638	0.4526	0.4857	0.4929	0.5157	0.4847	0.4212	0.5454	0.2769	0.3182	0.3109	0.3519	0.3635	0.4554	0.3812	0.3836	0.4013	0.3045	0.3547	0.467
800	0.5438	0.5486	0.541	0.5532	0.5741	0.5442	0.4398	0.4972	0.4957	0.4507	0.3787	0.4685	0.4999	0.5082	0.5324	0.5009	0.4344	0.5602	0.2923	0.3359	0.3283	0.3688	0.3801	0.4757	0.402	0.4028	0.4191	0.3209	0.3709	0.4907
820	0.5567	0.5625	0.5537	0.5685	0.59	0.5598	0.4552	0.5124	0.5115	0.467	0.3948	0.4848	0.5155	0.5235	0.549	0.5163	0.4499	0.5755	0.3097	0.3507	0.3462	0.3865	0.3951	0.4976	0.4209	0.4217	0.4389	0.3393	0.3893	0.5136
840	0.569	0.5772	0.5698	0.578	0.6023	0.5724	0.4705	0.5306	0.5276	0.4824	0.4099	0.4983	0.5288	0.536	0.5635	0.5306	0.4646	0.5865	0.3242	0.3682	0.3621	0.4055	0.4106	0.5127	0.4381	0.4404	0.457	0.3592	0.4074	0.5323
860	0.5814	0.5907	0.5821	0.5962	0.6165	0.5814	0.4868	0.5452	0.542	0.5004	0.4241	0.5076	0.5424	0.5497	0.5769	0.5411	0.4772	0.5968	0.3412	0.3844	0.3792	0.418	0.4265	0.5264	0.4552	0.4592	0.474	0.3712	0.4219	0.5494
880	0.5945	0.6025	0.5959	0.6047	0.6268	0.5963	0.5013	0.5601	0.558	0.5132	0.4399	0.5261	0.5562	0.5648	0.5908	0.5573	0.492	0.6113	0.3581	0.4032	0.3978	0.4352	0.4415	0.5477	0.4741	0.4788	0.4935	0.3915	0.4439	0.573
900	0.604	0.6136	0.6057	0.6147	0.6398	0.6093	0.5126	0.5741	0.5718	0.5288	0.4533	0.5411	0.5662	0.5748	0.6023	0.5702	0.5046	0.6238	0.3749	0.4209	0.415	0.454	0.4568	0.5686	0.4886	0.4959	0.5115	0.4082	0.4621	0.5938
920	0.6166	0.6248	0.6186	0.6237	0.6496	0.6188	0.5255	0.5856	0.5857	0.5397	0.4661	0.5513	0.5774	0.5879	0.6129	0.5797	0.5131	0.6327	0.3886	0.4377	0.4315	0.4702	0.4676	0.5812	0.5042	0.5118	0.5268	0.4259	0.4779	0.6081
940	0.6262	0.6353	0.6289	0.6357	0.6581	0.6289	0.5396	0.5983	0.5977	0.5559	0.4791	0.5645	0.5888	0.6	0.6275	0.5919	0.5267	0.644	0.4048	0.454	0.4492	0.4835	0.4858	0.5955	0.524	0.529	0.5441	0.4385	0.4958	0.6274
960	0.6358	0.6439	0.6404	0.6419	0.6646	0.6368	0.55	0.6127	0.6126	0.5651	0.4901	0.5726	0.5996	0.6102	0.637	0.6004	0.535	0.6511	0.4208	0.4692	0.4666	0.4982	0.4971	0.6076	0.5365	0.5445	0.5599	0.4561	0.5084	0.6406
980	0.6459	0.653	0.6505	0.6513	0.6748	0.6458	0.5613	0.622	0.6228	0.5772	0.5045	0.5873	0.609	0.6212	0.6467	0.6114	0.5468	0.6608	0.4354	0.4856	0.4816	0.5088	0.5109	0.6226	0.5515	0.5587	0.5742	0.4681	0.5278	0.658
1000	0.6547	0.661	0.6586	0.6595	0.6798	0.6519	0.5731	0.6341	0.6347	0.5887	0.5137	0.595	0.6202	0.6303	0.6568	0.6213	0.5548	0.6657	0.4502	0.4992	0.4942	0.5224	0.52	0.633	0.5665	0.5742	0.5872	0.4805	0.54	0.6698
1020	0.6604	0.6688	0.6647	0.6661	0.6897	0.6604	0.5838	0.6433	0.6464	0.6014	0.5262	0.6054	0.6282	0.6397	0.6641	0.6279	0.5659	0.6757	0.4646	0.5124	0.5109	0.5352	0.5334	0.647	0.5783	0.5853	0.5999	0.4953	0.5554	0.6838
1040	0.6674	0.676	0.6718	0.6726	0.6955	0.6658	0.5916	0.6526	0.6552	0.6102	0.5348	0.612	0.6351	0.6473	0.6724	0.6347	0.5729	0.6821	0.4773	0.5271	0.5248	0.5485	0.5427	0.6565	0.5888	0.5974	0.6107	0.512	0.568	0.6936
1060	0.674	0.6821	0.679	0.6797	0.7017	0.6707	0.6011	0.661	0.6631	0.6179	0.5447	0.6209	0.6427	0.6536	0.6788	0.6424	0.5822	0.6876	0.4903	0.5402	0.5378	0.5604	0.5546	0.6643	0.5991	0.6095	0.6211	0.52	0.579	0.7028
1080	0.6806	0.6882	0.6862	0.6839	0.7073	0.6753	0.611	0.6701	0.6719	0.6255	0.5497	0.6262	0.6514	0.662	0.6865	0.6473	0.5863	0.6916	0.5031	0.5518	0.5508	0.5719	0.5617	0.6711	0.6091	0.6222	0.6317	0.5362	0.59	0.7118
1100	0.6872	0.6961	0.6918	0.6886	0.7119	0.681	0.6204	0.6783	0.6802	0.6355	0.5604	0.6357	0.6572	0.6682	0.6916	0.6543	0.5943	0.6981	0.513	0.5607	0.5632	0.5804	0.5733	0.6804	0.619	0.6311	0.6406	0.5432	0.6014	0.7215
1120	0.6921	0.7021	0.6961	0.6912	0.7163	0.6859	0.6274	0.686	0.6878	0.64	0.5679	0.6437	0.6633	0.674	0.6979	0.6605	0.6012	0.7045	0.5232	0.5757	0.5759	0.5902	0.5815	0.6902	0.6256	0.6395	0.6497	0.5533	0.6087	0.7303
1140	0.6963	0.7072	0.7017	0.6957	0.721	0.6861	0.6343	0.6938	0.6959	0.6461	0.5727	0.6456	0.6706	0.6798	0.7055	0.6664	0.6034	0.7064	0.536	0.5866	0.5855	0.5975	0.5874	0.6926	0.633	0.6481	0.6554	0.5599	0.6128	0.7328
1160	0.7015	0.7117	0.7077	0.6996	0.723	0.6928	0.6415	0.7	0.7028	0.6522	0.5816	0.655	0.6754	0.6863	0.71	0.6721	0.6115	0.7135	0.545	0.597	0.5954	0.6081	0.5971	0.705	0.6396	0.6556	0.6651	0.5707	0.6233	0.7446
1180	0.7061	0.7166	0.7136	0.7032	0.7264	0.6968	0.6486	0.7066	0.7085	0.6595	0.5899	0.6605	0.679	0.6913	0.7147	0.6762	0.62	0.7169	0.5538	0.6051	0.6059	0.6145	0.6023	0.7109	0.6472	0.6637	0.674	0.5758	0.6325	0.7518
1200	0.7108	0.7205	0.7163	0.706	0.7291	0.7003	0.6549	0.7127	0.7154	0.6642	0.5937	0.6656	0.6819	0.6957	0.7211	0.6804	0.6209	0.7193	0.5617	0.6114	0.6148	0.6216	0.6066	0.7147	0.6544	0.6717	0.6789	0.5837	0.6385	0.7541
1220	0.7136	0.7257	0.721	0.7079	0.7336	0.704	0.6611	0.718	0.7218	0.6694	0.6039	0.6684	0.6858	0.7001	0.7252	0.686	0.6294	0.7238	0.5703	0.6217	0.6238	0.6279	0.6142	0.7192	0.6589	0.6793	0.6845	0.5901	0.6452	0.7611
1240	0.7174	0.7289	0.7242	0.7106	0.7359	0.7059	0.6667	0.7237	0.7254	0.6723	0.6075	0.6738	0.6901	0.7052	0.7281	0.6887	0.631	0.7275	0.5804	0.6289	0.633	0.6357	0.6191	0.7247	0.6638	0.6841	0.6911	0.5976	0.6482	0.766
1260	0.7199	0.7323	0.7277	0.7138	0.7384	0.7077	0.6705	0.7285	0.7297	0.6789	0.6133	0.6762	0.6944	0.7082	0.7324	0.6924	0.6363	0.7299	0.5877	0.6368	0.6393	0.6393	0.6247	0.7269	0.6704	0.6876	0.6969	0.6017	0.6549	0.7682
1280	0.7236	0.734	0.7315	0.7167	0.7406	0.7111	0.6758	0.7335	0.7349	0.6822	0.6165	0.6809	0.698	0.7116	0.737	0.6957	0.6399	0.7348	0.5961	0.6461	0.6456	0.6469	0.6308	0.7322	0.6749	0.6935	0.7019	0.6077	0.6592	0.7728
1300	0.7258	0.7375	0.7342	0.7181	0.7428	0.7108	0.6782	0.7376	0.7395	0.6867	0.6221	0.6828	0.7006	0.714	0.7402	0.6999	0.6429	0.7357	0.6021	0.6514	0.6528	0.6516	0.6359	0.7362	0.6786	0.6977	0.7048	0.613	0.6638	0.775
1320	0.7289	0.7412	0.7377	0.7204	0.7444	0.7144	0.6819	0.7407	0.7425	0.6909	0.6265	0.6868	0.7045	0.7179	0.7442	0.7019	0.645	0.7378	0.6093	0.6576	0.6571	0.6554	0.6399	0.7395	0.6829	0.7025	0.7078	0.6177	0.6665	0.7775
1340	0.7317	0.7436	0.7393	0.7233	0.7467	0.7162	0.6849	0.7452	0.7469	0.6946	0.6325	0.6912	0.7091	0.7212	0.747	0.7046	0.6502	0.7397	0.6129	0.6627	0.6621	0.6607	0.6444	0.742	0.6886	0.7069	0.7115	0.6206	0.6727	0.7809
1360	0.7355	0.7469	0.7426	0.725	0.7482	0.7196	0.6898	0.7483	0.7516	0.697	0.6345	0.695	0.7098	0.7236	0.7494	0.7062	0.652	0.7417	0.6183	0.6689	0.6681	0.6629	0.6497	0.7469	0.691	0.7103	0.7154	0.6259	0.6742	0.7838
1380	0.7383	0.7498	0.7454	0.7279	0.7516	0.7191	0.6929	0.7524	0.755	0.7016	0.637	0.6961	0.7138	0.7274	0.7522	0.7098	0.6547	0.7422	0.6245	0.6734	0.6737	0.6668	0.651	0.7482	0.6941	0.7145	0.7191	0.6254	0.6738	0.7837
1400	0.7399	0.7519	0.747	0.7281	0.7523	0.7215	0.6961	0.7556	0.7578	0.7023	0.6397	0.7008	0.7163	0.7305	0.7544	0.7117	0.6572	0.7446	0.6274	0.6775	0.6802	0.6713	0.6561	0.7515	0.6965	0.7167	0.7216	0.6314	0.6792	0.7872
1420	0.7412	0.7547	0.7503	0.7308	0.7548	0.7208	0.6989	0.7584	0.7611	0.7071	0.6425	0.7002	0.7187	0.7341	0.7576	0.7133	0.6594	0.7451	0.6319	0.6821	0.6819	0.6716	0.6581	0.7524	0.6994	0.7195	0.7236	0.63	0.6801	0.7853
1440	0.7437	0.7568	0.7526	0.7307	0.755	0.7239	0.7017	0.7632	0.7641	0.7086	0.6468	0.7055	0.7217	0.7362	0.7585	0.7161	0.6624	0.75	0.6366	0.6861	0.6865	0.6767	0.6611	0.7568	0.7022	0.7231	0.7277	0.6356	0.6852	0.7907
1460	0.7459	0.7585	0.7538	0.7323	0.7545	0.7249	0.7046	0.765	0.7669	0.7127	0.6504	0.7064	0.7251	0.739	0.7613	0.7202	0.666	0.7501	0.6401	0.69	0.69	0.6793	0.6644	0.7578	0.7053	0.7253	0.7301	0.6354	0.6887	0.791
1480	0.747	0.76	0.7556	0.7327	0.7571	0.7247	0.7089	0.7684	0.7707	0.7142	0.653	0.7097	0.727	0.7406	0.7624	0.7228	0.6671	0.7509	0.6462	0.6933	0.6939	0.6838	0.6663	0.758	0.7069	0.7284	0.7328	0.6403	0.6893	0.7915
1500	0.7487	0.7629	0.7574	0.7341	0.7581	0.7256	0.7111	0.7714	0.7736	0.7169	0.6561	0.7109	0.729	0.7431	0.7651	0.7238	0.6691	0.7524	0.6492	0.6962	0.697	0.6854	0.6694	0.7599	0.7086	0.7289	0.7358	0.6401	0.6918	0.7937
1520	0.7497	0.7643	0.7589	0.7347	0.7571	0.7269	0.7128	0.774	0.7761	0.7171	0.6574	0.7128	0.7312	0.7468	0.7671	0.7241	0.6698	0.7531	0.6524	0.6997	0.6994	0.6873	0.6716	0.7625	0.7101	0.7321	0.7373	0.6426	0.6942	0.7952
1540	0.7524	0.7649	0.762	0.7362	0.7592	0.7276	0.7158	0.7762	0.7781	0.7202	0.6617	0.713	0.7328	0.7486	0.769	0.7277	0.6744	0.7545	0.6571	0.7024	0.7035	0.6902	0.6746	0.7627	0.7129	0.7342	0.7392	0.644	0.6978	0.795
1560	0.753	0.7667	0.7625	0.7371	0.7588	0.7295	0.7187	0.7782	0.7811	0.7217	0.6622	0.7169	0.7344	0.7498	0.7702	0.7286	0.6748	0.7554	0.6605	0.7037	0.7082	0.6915	0.6763	0.7656	0.7134	0.7361	0.7407	0.6447	0.6978	0.7974
1580	0.7536	0.7684	0.7639	0.7372	0.7595	0.7296	0.7211	0.7804	0.7821	0.7232	0.665	0.7178	0.7356	0.7509	0.7715	0.7305	0.6789	0.7576	0.6644	0.7072	0.7096	0.695	0.6781	0.7666	0.7159	0.7378	0.7429	0.6466	0.7021	0.799
1600	0.7545	0.7694	0.7654	0.7379	0.7601	0.7298	0.7238	0.7827	0.7835	0.7224	0.6655	0.7181	0.7371	0.7521	0.7725	0.7305	0.6795	0.7575	0.6662	0.7108	0.7131	0.698	0.6796	0.7663	0.717	0.7406	0.7457	0.6513	0.7009	0.7982
1620	0.7572	0.7703	0.7677	0.7392	0.761	0.7297	0.7241	0.7838	0.7847	0.7265	0.6684	0.7187	0.7396	0.7541	0.7758	0.7336	0.6812	0.7581	0.667	0.7126	0.7164	0.6988	0.6807	0.767	0.7197	0.7413	0.7466	0.65	0.704	0.7967
1640	0.7592	0.772	0.7698	0.7398	0.7623	0.732	0.7271	0.7868	0.7878	0.7277	0.67	0.7224	0.7412	0.7562	0.7754	0.7351	0.6835	0.7617	0.669	0.7146	0.7178	0.7006	0.6833	0.7706	0.7213	0.744	0.748	0.6515	0.7047	0.8
1660	0.76	0.7732	0.7705	0.7405	0.7629	0.7311	0.7303	0.7874	0.7896	0.73	0.6716	0.7218	0.7433	0.7584	0.7787	0.7351	0.6846	0.7613	0.6709	0.7178	0.7207	0.702	0.6846	0.7688	0.7224	0.745	0.7482	0.6538	0.7051	0.7986
1680	0.7609	0.7752	0.7712	0.7406	0.764	0.7322	0.7303	0.7895	0.7914	0.7289	0.673	0.7233	0.744	0.7601	0.78	0.7355	0.6874	0.7627	0.6739	0.7193	0.7212	0.7051	0.6858	0.769	0.7228	0.7467	0.7504	0.658	0.7064	0.7999
1700	0.7621	0.7758	0.7718	0.7422	0.765	0.7338	0.7315	0.7922	0.7935	0.7324	0.6746	0.7249	0.7451	0.7611	0.782	0.7376	0.6902	0.7646	0.6748	0.721	0.7239	0.705	0.6877	0.7712	0.7253	0.7478	0.7521	0.6558	0.7084	0.8007
1720	0.7625	0.777	0.7729	0.7427	0.7657	0.7335	0.7332	0.7932	0.7953	0.7326	0.6746	0.7254	0.7465	0.763	0.783	0.7386	0.6887	0.7649	0.6778	0.7233	0.7254	0.7075	0.6882	0.7697	0.7275	0.7493	0.754	0.6594	0.707	0.7996
1740	0.7641	0.779	0.7738	0.7445	0.7658	0.7324	0.7347	0.7943	0.7975	0.7354	0.6759	0.7242	0.7496	0.7647	0.7845	0.7399	0.6886	0.764	0.6787	0.7258	0.7298	0.7073	0.6884	0.7682	0.7275	0.7498	0.7558	0.6564	0.7074	0.7981
1760	0.7647	0.7802	0.776	0.7428	0.7664	0.7338	0.7365	0.7955	0.7992	0.7363	0.6797	0.7288	0.7509	0.7657	0.7864	0.7409	0.6922	0.7657	0.6817	0.7278	0.7298	0.7102	0.6903	0.7706	0.7287	0.7513	0.757	0.661	0.7114	0.8014
1780	0.7653	0.7801	0.7765	0.7444	0.7679	0.7354	0.739	0.7983	0.8005	0.7391	0.6819	0.7289	0.7518	0.7674	0.7874	0.7424	0.6948	0.7672	0.6828	0.729	0.7314	0.7116	0.6921	0.7713	0.7295	0.7517	0.7585	0.6599	0.7117	0.8007
1800	0.7654	0.7809	0.7773	0.7437	0.7686	0.7356	0.7393	0.7991	0.8025	0.7384	0.6817	0.7295	0.7541	0.7689	0.7887	0.7431	0.6936	0.7679	0.6839	0.7309	0.7315	0.7121	0.6932	0.7706	0.7303	0.7533	0.7592	0.6629	0.7118	0.8006
1820	0.7669	0.7819	0.7793	0.7442	0.7689	0.7367	0.7415	0.8009	0.8045	0.7404	0.6829	0.7309	0.7545	0.7702	0.7895	0.7433	0.697	0.7687	0.6859	0.7316	0.733	0.7136	0.6936	0.7725	0.7322	0.7547	0.7601	0.6636	0.7134	0.8018
1840	0.7677	0.7829	0.7808	0.7438	0.7678	0.7367	0.7439	0.8015	0.8047	0.7408	0.6828	0.7306	0.7559	0.7706	0.7906	0.7442	0.6963	0.7695	0.6877	0.7338	0.7343	0.7158	0.6944	0.7725	0.7323	0.7567	0.7604	0.6682	0.7138	0.8009
1860	0.7682	0.7829	0.7814	0.7463	0.7697	0.7359	0.7449	0.8026	0.8066	0.7434	0.6871	0.7299	0.757	0.772	0.7911	0.746	0.6992	0.7683	0.6904	0.7345	0.7361	0.716	0.696	0.7702	0.7341	0.7571	0.7611	0.6636	0.7161	0.8
1880	0.769	0.7841	0.7811	0.7469	0.7706	0.7372	0.7455	0.8039	0.8074	0.7446	0.6866	0.7331	0.7591	0.7737	0.7939	0.7469	0.6998	0.7691	0.6905	0.7362	0.7367	0.7174	0.696	0.7726	0.7351	0.7582	0.7613	0.6646	0.7146	0.8019
1900	0.7704	0.7856	0.7827	0.7464	0.7707	0.7373	0.7483	0.8055	0.8083	0.7448	0.6888	0.7307	0.7588	0.7751	0.7929	0.7482	0.7022	0.7689	0.691	0.7367	0.7372	0.7179	0.697	0.7696	0.735	0.7596	0.7629	0.667	0.7176	0.7993
1920	0.7713	0.7866	0.7827	0.7474	0.7705	0.7396	0.7487	0.8063	0.8098	0.7439	0.6894	0.7361	0.7613	0.7761	0.795	0.7482	0.7022	0.7714	0.6922	0.7394	0.7387	0.7173	0.6992	0.7742	0.7367	0.7613	0.7638	0.6678	0.7179	0.8038
1940	0.7711	0.787	0.7844	0.7477	0.7715	0.7399	0.7505	0.8072	0.8128	0.7451	0.6918	0.7367	0.761	0.7771	0.7951	0.7505	0.7055	0.773	0.693	0.7397	0.7411	0.7165	0.699	0.7758	0.7372	0.762	0.7646	0.6667	0.7194	0.8046
1960	0.7724	0.7873	0.7841	0.7482	0.7717	0.7397	0.7518	0.8087	0.8132	0.7456	0.6928	0.737	0.7613	0.7781	0.7947	0.7508	0.7046	0.7733	0.6949	0.7402	0.7434	0.7187	0.6996	0.7751	0.7385	0.7628	0.7667	0.6702	0.7174	0.804
1980	0.7734	0.7891	0.7863	0.7489	0.7722	0.7382	0.7526	0.811	0.8143	0.7476	0.6926	0.7341	0.7614	0.7796	0.7966	0.7515	0.7046	0.7725	0.6959	0.7414	0.7425	0.719	0.6991	0.7727	0.7386	0.7635	0.7663	0.6689	0.7147	0.8008
2000	0.7747	0.7893	0.787	0.7497	0.7725	0.7406	0.7534	0.8111	0.8145	0.7472	0.6967	0.7383	0.7644	0.7808	0.7985	0.753	0.7082	0.775	0.6961	0.7422	0.7434	0.7202	0.7004	0.7768	0.7414	0.7639	0.7666	0.6722	0.7194	0.8038

## Sheet: B right
Time (min)	WT	WT	WT	WT,prgal1-Bub1	WT,prgal1-Bub1	WT,prgal1-Bub1	AllMELT	AllMELT	AllMELT	ALLMelt, prgal1-Bub1_1	ALLMelt, prgal1-Bub1_1	ALLMelt, prgal1-Bub1_1	AllMelt, prGal1-Bub1_2	AllMelt, prGal1-Bub1_2	AllMelt, prGal1-Bub1_2
0	0.0283	0.0262	0.0263	0.0294	0.0234	0.0256	0.0339	0.0269	0.0217	0.0346	0.0255	0.0242	0.0286	0.0286	0.0278	0.0262
20	0.0332	0.0311	0.0319	0.0317	0.031	0.0326	0.0318	0.0334	0.0293	0.0297	0.03	0.0295	0.0311	0.0311	0.0324	0.029
40	0.0355	0.0318	0.0347	0.0368	0.0293	0.0233	0.0262	0.0309	0.0331	0.0252	0.0246	0.0273	0.0269	0.0269	0.0264	0.0256
60	0.0297	0.0303	0.0332	0.0354	0.03	0.0285	0.0238	0.0332	0.0259	0.0259	0.0241	0.0252	0.0177	0.0177	0.0209	0.0306
80	0.0337	0.0389	0.0321	0.034	0.0238	0.0287	0.0266	0.029	0.0261	0.0222	0.0262	0.0276	0.0219	0.0219	0.0212	0.0298
100	0.0351	0.0412	0.0365	0.032	0.0285	0.0273	0.0304	0.0303	0.0293	0.0238	0.0269	0.0246	0.0228	0.0228	0.0215	0.0255
120	0.0361	0.0474	0.0345	0.0294	0.0293	0.0342	0.0292	0.0302	0.031	0.0238	0.0275	0.0262	0.0262	0.0262	0.024	0.0289
140	0.0405	0.0504	0.0399	0.0315	0.032	0.0307	0.0319	0.0353	0.0318	0.0251	0.0295	0.0254	0.0251	0.0251	0.0274	0.0254
160	0.0428	0.0522	0.0412	0.0337	0.0349	0.0311	0.0317	0.0379	0.0321	0.0247	0.0306	0.0282	0.0269	0.0269	0.0285	0.0291
180	0.0449	0.0521	0.0446	0.0333	0.0385	0.0312	0.0324	0.0412	0.0328	0.0256	0.0336	0.0277	0.0275	0.0275	0.0279	0.0311
200	0.0479	0.0565	0.0481	0.0375	0.0402	0.0342	0.0343	0.0423	0.0349	0.0258	0.035	0.0276	0.0278	0.0278	0.0283	0.0336
220	0.0505	0.0555	0.0505	0.039	0.0419	0.0361	0.0359	0.0446	0.0371	0.027	0.0372	0.0281	0.0297	0.0297	0.03	0.0352
240	0.0526	0.0604	0.0521	0.0378	0.044	0.0356	0.0385	0.0473	0.0395	0.027	0.0394	0.0299	0.0309	0.0309	0.032	0.0373
260	0.0555	0.0626	0.0555	0.0388	0.0465	0.0373	0.0402	0.0495	0.0412	0.0279	0.0417	0.0303	0.0324	0.0324	0.0335	0.0385
280	0.0581	0.0644	0.0585	0.0413	0.0486	0.0391	0.0427	0.0519	0.0439	0.0289	0.0433	0.0307	0.0343	0.0343	0.0361	0.0406
300	0.0608	0.0668	0.061	0.043	0.0505	0.0408	0.0449	0.0543	0.0463	0.0305	0.0457	0.0322	0.0358	0.0358	0.0367	0.0421
320	0.0632	0.0695	0.0637	0.0455	0.0531	0.0432	0.0475	0.0568	0.0486	0.0321	0.0476	0.0334	0.0381	0.0381	0.0394	0.0449
340	0.0659	0.0715	0.0657	0.0477	0.0547	0.0453	0.05	0.0594	0.0508	0.0339	0.0506	0.0349	0.0396	0.0396	0.0409	0.0467
360	0.0682	0.0739	0.0683	0.0492	0.0568	0.0473	0.0523	0.0622	0.0532	0.0357	0.0521	0.0363	0.0415	0.0415	0.0427	0.0486
380	0.0709	0.0761	0.0701	0.0513	0.0593	0.0494	0.0547	0.0649	0.0562	0.0376	0.0548	0.0381	0.0435	0.0435	0.0447	0.0507
400	0.0723	0.0775	0.0713	0.0521	0.0599	0.0499	0.0556	0.0659	0.0569	0.0379	0.0556	0.0384	0.0442	0.0442	0.0455	0.0517
420	0.0761	0.0816	0.0753	0.0553	0.0634	0.0536	0.0594	0.0701	0.061	0.0408	0.0583	0.0411	0.0474	0.0474	0.049	0.0555
440	0.0791	0.0845	0.0783	0.0577	0.0658	0.0559	0.0617	0.0723	0.0627	0.0428	0.0609	0.0428	0.0492	0.0492	0.0509	0.0576
460	0.0816	0.0869	0.0809	0.0599	0.0682	0.0585	0.0642	0.0749	0.0659	0.0444	0.0634	0.0445	0.0511	0.0511	0.0533	0.0598
480	0.0846	0.0897	0.0838	0.0621	0.0708	0.0606	0.0664	0.0768	0.0677	0.0462	0.0646	0.0461	0.0529	0.0529	0.0553	0.0621
500	0.0875	0.0922	0.0862	0.0635	0.0728	0.0626	0.0688	0.0795	0.0706	0.0478	0.0671	0.0479	0.0551	0.0551	0.0572	0.0641
520	0.0904	0.0954	0.0891	0.0657	0.0753	0.0648	0.0711	0.0822	0.0732	0.0495	0.0697	0.0495	0.057	0.057	0.0595	0.0663
540	0.0917	0.0967	0.0902	0.0665	0.0763	0.0653	0.0721	0.0831	0.0734	0.0499	0.0703	0.0498	0.0579	0.0579	0.06	0.0671
560	0.096	0.1006	0.094	0.0699	0.0802	0.0688	0.076	0.0875	0.0774	0.0531	0.074	0.0531	0.0609	0.0609	0.063	0.0701
580	0.0985	0.1037	0.098	0.0727	0.083	0.0714	0.0782	0.0897	0.0796	0.0547	0.0761	0.0546	0.0628	0.0628	0.0654	0.0727
600	0.101	0.1063	0.1003	0.0747	0.0853	0.0734	0.0808	0.0925	0.082	0.0562	0.0778	0.0561	0.0645	0.0645	0.0672	0.0746
620	0.104	0.1092	0.103	0.0768	0.0877	0.0757	0.0833	0.0949	0.0845	0.0578	0.0796	0.0581	0.0665	0.0665	0.0692	0.0765
640	0.1067	0.1123	0.1056	0.0781	0.0901	0.0774	0.0858	0.098	0.0874	0.0594	0.0817	0.0602	0.0686	0.0686	0.0714	0.0786
660	0.1102	0.1152	0.1084	0.0802	0.0925	0.0795	0.088	0.1004	0.0898	0.0612	0.0837	0.0621	0.0705	0.0705	0.0732	0.0807
680	0.1131	0.1182	0.1106	0.0825	0.0951	0.0817	0.0908	0.1032	0.0925	0.0632	0.0857	0.0644	0.0722	0.0722	0.0751	0.0827
700	0.1156	0.1207	0.1138	0.0856	0.0981	0.0843	0.0934	0.1058	0.0949	0.0645	0.0872	0.066	0.0741	0.0741	0.0769	0.0847
720	0.1187	0.1237	0.117	0.0882	0.1009	0.0868	0.0959	0.1089	0.0968	0.066	0.0883	0.0675	0.0756	0.0756	0.079	0.0866
740	0.1216	0.1267	0.1203	0.0902	0.1032	0.0892	0.0984	0.1119	0.0996	0.0675	0.0903	0.0698	0.0777	0.0777	0.0807	0.0889
760	0.1246	0.1298	0.1221	0.0922	0.1063	0.0915	0.1009	0.1144	0.1026	0.0693	0.0926	0.0718	0.0793	0.0793	0.0822	0.0909
780	0.1288	0.1331	0.1249	0.0939	0.1086	0.0936	0.1034	0.1175	0.1056	0.0706	0.0943	0.0738	0.0813	0.0813	0.0839	0.0929
800	0.1314	0.1362	0.1279	0.0959	0.1111	0.0958	0.1063	0.1197	0.108	0.0725	0.0964	0.0759	0.0827	0.0827	0.0857	0.0949
820	0.1339	0.1394	0.1306	0.0981	0.1136	0.0984	0.109	0.1224	0.111	0.074	0.0986	0.0776	0.0843	0.0843	0.0874	0.0966
840	0.1376	0.1428	0.1337	0.1003	0.1164	0.1007	0.1116	0.1257	0.114	0.0759	0.1003	0.0796	0.0862	0.0862	0.0892	0.0992
860	0.1409	0.146	0.1368	0.1029	0.1197	0.1034	0.1146	0.1283	0.1168	0.0773	0.1023	0.0814	0.0876	0.0876	0.091	0.1013
880	0.1442	0.1491	0.1396	0.1057	0.1225	0.1059	0.1173	0.1306	0.1197	0.0791	0.1043	0.0834	0.0892	0.0892	0.0929	0.1034
900	0.1466	0.1523	0.143	0.1086	0.1253	0.1085	0.12	0.1335	0.1226	0.0806	0.1058	0.0848	0.091	0.091	0.0952	0.1057
920	0.15	0.1559	0.1459	0.111	0.1281	0.1113	0.1229	0.1368	0.1252	0.0822	0.1078	0.0869	0.0928	0.0928	0.097	0.1077
940	0.1537	0.1592	0.1485	0.1136	0.1306	0.1139	0.126	0.1403	0.1283	0.0839	0.11	0.0889	0.0943	0.0943	0.0989	0.1099
960	0.157	0.1621	0.1528	0.1161	0.1331	0.1166	0.1288	0.1431	0.1304	0.085	0.1112	0.0903	0.0962	0.0962	0.1014	0.1119
980	0.1608	0.1657	0.1548	0.1183	0.1359	0.119	0.1317	0.1459	0.1332	0.0868	0.1137	0.0925	0.0981	0.0981	0.1027	0.1135
1000	0.1642	0.1691	0.158	0.1209	0.139	0.1221	0.1349	0.1488	0.136	0.0885	0.116	0.0946	0.0999	0.0999	0.1047	0.1159
1020	0.1672	0.172	0.162	0.1239	0.1417	0.1252	0.1373	0.1518	0.1385	0.0897	0.1175	0.0963	0.1018	0.1018	0.1068	0.1179
1040	0.1707	0.1763	0.1646	0.1264	0.1448	0.1275	0.1406	0.1548	0.142	0.0917	0.12	0.0982	0.1036	0.1036	0.1085	0.1203
1060	0.1737	0.179	0.1682	0.1296	0.1477	0.1301	0.1433	0.1578	0.1447	0.0933	0.1212	0.1	0.105	0.105	0.1107	0.1226
1080	0.1775	0.1821	0.1713	0.1319	0.1504	0.1326	0.1467	0.1606	0.1474	0.0951	0.1235	0.1024	0.1073	0.1073	0.1125	0.1249
1100	0.1808	0.1851	0.1745	0.1344	0.1534	0.135	0.1496	0.1638	0.1504	0.0967	0.1257	0.1041	0.109	0.109	0.1145	0.127
1120	0.1848	0.1896	0.1782	0.1372	0.1568	0.1377	0.1531	0.167	0.1532	0.0984	0.1276	0.1065	0.1111	0.1111	0.1164	0.1292
1140	0.1883	0.1928	0.1815	0.1399	0.1593	0.1408	0.1555	0.1702	0.1562	0.0996	0.1293	0.1077	0.1125	0.1125	0.1186	0.1314
1160	0.1916	0.1962	0.1848	0.1428	0.1616	0.1437	0.1591	0.1734	0.1592	0.1013	0.1312	0.1096	0.1142	0.1142	0.1205	0.1334
1180	0.195	0.1997	0.1876	0.1465	0.1642	0.1458	0.1625	0.1761	0.1628	0.1037	0.1337	0.1118	0.1164	0.1164	0.1223	0.1355
1200	0.1988	0.2028	0.1916	0.1491	0.1671	0.1488	0.1654	0.1789	0.1654	0.1049	0.135	0.1134	0.1182	0.1182	0.1246	0.1379
1220	0.2027	0.2058	0.194	0.1513	0.1701	0.1522	0.1686	0.1819	0.169	0.107	0.1374	0.1158	0.1201	0.1201	0.1263	0.1401
1240	0.2056	0.2086	0.1981	0.1542	0.1727	0.1549	0.1723	0.1849	0.1711	0.1084	0.1387	0.117	0.1216	0.1216	0.1292	0.1422
1260	0.2092	0.2131	0.2015	0.1569	0.175	0.1576	0.1754	0.1882	0.1745	0.1103	0.1409	0.1194	0.1234	0.1234	0.131	0.1445
1280	0.2123	0.2164	0.2043	0.159	0.1782	0.1608	0.1786	0.1918	0.1781	0.1128	0.1432	0.1218	0.1258	0.1258	0.1335	0.147
1300	0.2162	0.2199	0.208	0.1617	0.1808	0.1629	0.1819	0.1948	0.1814	0.1146	0.1454	0.124	0.1275	0.1275	0.1358	0.149
1320	0.2203	0.224	0.2117	0.1646	0.1837	0.1661	0.1856	0.1973	0.1839	0.1162	0.1472	0.1259	0.1296	0.1296	0.1374	0.1515
1340	0.2247	0.2272	0.215	0.1669	0.1862	0.1692	0.1884	0.2008	0.1875	0.1179	0.1491	0.128	0.1314	0.1314	0.1396	0.1532
1360	0.2284	0.2302	0.2174	0.1698	0.1893	0.172	0.1913	0.2038	0.1906	0.1193	0.1517	0.1299	0.1336	0.1336	0.1415	0.1556
1380	0.2316	0.2334	0.2212	0.1731	0.1925	0.1745	0.1946	0.2071	0.1939	0.1212	0.154	0.1317	0.136	0.136	0.1436	0.1579
1400	0.2355	0.2372	0.2241	0.1764	0.1951	0.177	0.1985	0.2101	0.1967	0.1232	0.1562	0.1333	0.1372	0.1372	0.1457	0.1601
1420	0.2391	0.2407	0.2277	0.1789	0.1975	0.1798	0.2018	0.2138	0.2005	0.1249	0.1584	0.1359	0.139	0.139	0.1482	0.1619
1440	0.2436	0.2441	0.2317	0.1812	0.2007	0.1828	0.2045	0.2164	0.2032	0.1267	0.1606	0.1381	0.1415	0.1415	0.1505	0.164
1460	0.2467	0.2482	0.2338	0.1836	0.2029	0.1852	0.2082	0.2202	0.2073	0.1286	0.1632	0.1405	0.1437	0.1437	0.152	0.166
1480	0.2511	0.2512	0.2371	0.1872	0.206	0.1887	0.2119	0.2236	0.2103	0.13	0.1649	0.1418	0.1461	0.1461	0.155	0.1681
1500	0.2551	0.2542	0.2402	0.1898	0.2089	0.1917	0.2147	0.2266	0.2139	0.1319	0.1665	0.1441	0.1482	0.1482	0.1566	0.1699
1520	0.2585	0.2588	0.2439	0.1931	0.2129	0.1936	0.2179	0.2298	0.2165	0.1337	0.169	0.146	0.15	0.15	0.1588	0.1715
1540	0.2617	0.261	0.2463	0.196	0.2151	0.1963	0.2215	0.2334	0.2198	0.1355	0.1707	0.1481	0.1518	0.1518	0.161	0.1736
1560	0.265	0.2654	0.2489	0.1991	0.2181	0.1989	0.2251	0.2356	0.2219	0.1372	0.1725	0.1498	0.1541	0.1541	0.1628	0.1757
1580	0.2686	0.2681	0.2525	0.2024	0.2199	0.2027	0.2282	0.2386	0.2256	0.1385	0.1742	0.152	0.1563	0.1563	0.1653	0.1779
1600	0.2711	0.2725	0.2556	0.2058	0.2233	0.205	0.232	0.2428	0.229	0.1403	0.1768	0.1539	0.1583	0.1583	0.1672	0.1798
1620	0.2755	0.2747	0.2592	0.2085	0.2255	0.2084	0.2355	0.2461	0.2322	0.141	0.1782	0.1553	0.1604	0.1604	0.1696	0.181
1640	0.279	0.2788	0.2632	0.2114	0.2287	0.2113	0.2395	0.2486	0.2346	0.1425	0.1804	0.1573	0.1625	0.1625	0.172	0.1832
1660	0.2831	0.282	0.2665	0.2145	0.2312	0.214	0.2429	0.2516	0.2377	0.1437	0.1825	0.1591	0.1645	0.1645	0.1735	0.1849
1680	0.2854	0.2858	0.2694	0.2178	0.2335	0.2168	0.2465	0.2554	0.2411	0.1454	0.1846	0.1611	0.1665	0.1665	0.1759	0.1866
1700	0.2891	0.2896	0.2722	0.2208	0.2368	0.2203	0.2503	0.2584	0.2445	0.147	0.187	0.1626	0.1684	0.1684	0.178	0.1886
1720	0.2929	0.2928	0.2752	0.224	0.2397	0.2231	0.2536	0.2622	0.2474	0.148	0.1886	0.1642	0.1698	0.1698	0.1803	0.1906
1740	0.2974	0.296	0.2785	0.2261	0.2418	0.226	0.257	0.2657	0.2518	0.1503	0.1911	0.1666	0.1724	0.1724	0.1818	0.1925
1760	0.301	0.2979	0.2822	0.2294	0.2446	0.2285	0.2604	0.2681	0.2537	0.1512	0.1926	0.1679	0.1743	0.1743	0.1845	0.1947
1780	0.3047	0.3017	0.2854	0.2314	0.2476	0.2315	0.2635	0.2719	0.2579	0.1527	0.1941	0.1698	0.1764	0.1764	0.1868	0.1959
1800	0.3078	0.3052	0.2874	0.2351	0.2505	0.2348	0.268	0.2755	0.2608	0.1546	0.196	0.1707	0.1783	0.1783	0.1887	0.1981
1820	0.3118	0.3092	0.2922	0.2378	0.2531	0.2372	0.2712	0.2791	0.2638	0.1561	0.1989	0.1725	0.1804	0.1804	0.1909	0.1998
1840	0.3145	0.3125	0.2953	0.2416	0.256	0.2406	0.2744	0.2823	0.2678	0.1574	0.2009	0.1744	0.1823	0.1823	0.1932	0.2017
1860	0.3184	0.3147	0.2978	0.2436	0.2575	0.2431	0.2775	0.285	0.2704	0.1592	0.2031	0.1763	0.1844	0.1844	0.195	0.2035
1880	0.32	0.3202	0.3005	0.2463	0.2603	0.2457	0.2818	0.2883	0.2748	0.1614	0.2059	0.1787	0.1859	0.1859	0.1969	0.2057
1900	0.3243	0.3226	0.3028	0.2506	0.2629	0.249	0.2851	0.2912	0.2775	0.1618	0.2075	0.1791	0.1883	0.1883	0.199	0.2068
1920	0.3273	0.3254	0.3058	0.2525	0.2652	0.2528	0.289	0.2954	0.2808	0.1635	0.2094	0.1826	0.1907	0.1907	0.2005	0.2087
1940	0.3302	0.3295	0.3103	0.2565	0.2683	0.255	0.2917	0.2987	0.2834	0.1645	0.2105	0.183	0.1924	0.1924	0.2025	0.2105
1960	0.3338	0.3313	0.3128	0.2593	0.2701	0.2581	0.2958	0.3021	0.2867	0.1663	0.2131	0.1846	0.1939	0.1939	0.2045	0.2125
1980	0.3367	0.3349	0.3156	0.2625	0.2734	0.2614	0.3003	0.3039	0.2904	0.1678	0.2151	0.1862	0.1961	0.1961	0.2063	0.2143
2000	0.3402	0.3385	0.3187	0.2645	0.2767	0.2632	0.3032	0.3063	0.2925	0.1694	0.2172	0.1883	0.1977	0.1977	0.2085	0.2161
2020	0.3428	0.3408	0.322	0.2677	0.2788	0.2667	0.3076	0.3101	0.2959	0.1712	0.2189	0.1895	0.1997	0.1997	0.2109	0.2181
2040	0.3459	0.3449	0.3256	0.2714	0.2816	0.2687	0.3118	0.3149	0.299	0.1722	0.2208	0.1918	0.2012	0.2012	0.2131	0.2196
2060	0.3479	0.3458	0.3278	0.274	0.2828	0.2706	0.3144	0.3159	0.3016	0.1731	0.2217	0.1931	0.2019	0.2019	0.2129	0.2199
2080	0.351	0.3485	0.3293	0.2765	0.2851	0.2733	0.3179	0.3194	0.3041	0.174	0.2229	0.1941	0.2043	0.2043	0.2157	0.2225
2100	0.3557	0.3552	0.334	0.2807	0.2891	0.2774	0.3219	0.3243	0.3096	0.1773	0.2269	0.197	0.208	0.208	0.2191	0.2253
2120	0.3584	0.358	0.3386	0.2843	0.2924	0.28	0.3259	0.3261	0.3126	0.1783	0.2278	0.1987	0.2096	0.2096	0.221	0.227
2140	0.362	0.3606	0.3421	0.2882	0.294	0.2829	0.3294	0.3304	0.315	0.1802	0.2299	0.1999	0.2117	0.2117	0.2234	0.2284
2160	0.3651	0.364	0.3437	0.2901	0.2969	0.286	0.3325	0.3338	0.3192	0.1815	0.2322	0.2017	0.214	0.214	0.2253	0.2308
2180	0.3683	0.3672	0.3469	0.2935	0.2998	0.2889	0.3367	0.3369	0.3226	0.1832	0.2341	0.2029	0.2155	0.2155	0.2273	0.2336
2200	0.3705	0.3697	0.3485	0.2964	0.3021	0.2915	0.3403	0.3398	0.3243	0.1846	0.2359	0.2042	0.2178	0.2178	0.2285	0.2353
2220	0.373	0.3726	0.3525	0.2987	0.3052	0.2942	0.3441	0.3433	0.3277	0.1866	0.2382	0.2063	0.2195	0.2195	0.2312	0.2372
2240	0.3768	0.3762	0.3561	0.3018	0.308	0.2976	0.3494	0.347	0.331	0.1874	0.2403	0.208	0.2214	0.2214	0.233	0.238
2260	0.3797	0.38	0.3591	0.3056	0.3114	0.3001	0.3512	0.3493	0.334	0.1886	0.2424	0.2088	0.2237	0.2237	0.2348	0.2399
2280	0.3821	0.3823	0.3617	0.3083	0.3128	0.302	0.3555	0.3533	0.3372	0.1904	0.2438	0.2095	0.2259	0.2259	0.2366	0.242
2300	0.3863	0.3861	0.3641	0.3123	0.3163	0.3057	0.3585	0.3554	0.3408	0.1925	0.2472	0.2123	0.2269	0.2269	0.2383	0.2437
2320	0.3904	0.3876	0.368	0.3154	0.3171	0.3095	0.3628	0.3574	0.343	0.1938	0.2481	0.2132	0.229	0.229	0.2404	0.245
2340	0.3922	0.3919	0.3716	0.3177	0.3196	0.3123	0.3676	0.36	0.3467	0.1956	0.2491	0.2148	0.2308	0.2308	0.2427	0.2465
2360	0.3958	0.3939	0.3729	0.3218	0.3217	0.3152	0.3706	0.364	0.3498	0.1968	0.2508	0.2164	0.2328	0.2328	0.245	0.2483
2380	0.3989	0.3972	0.3766	0.3243	0.3252	0.3171	0.3735	0.3667	0.3524	0.1984	0.2535	0.2179	0.2343	0.2343	0.2465	0.2494
2400	0.4013	0.401	0.3789	0.3267	0.3278	0.3201	0.3775	0.3718	0.3564	0.2	0.2563	0.2196	0.2364	0.2364	0.2479	0.2512
2420	0.4044	0.4047	0.3823	0.3295	0.3302	0.3236	0.3798	0.3743	0.3594	0.201	0.2574	0.22	0.2389	0.2389	0.2509	0.2536
2440	0.4058	0.4078	0.3855	0.3323	0.3326	0.3265	0.3832	0.377	0.3627	0.2035	0.2589	0.2221	0.2406	0.2406	0.2518	0.2557
2460	0.41	0.4096	0.3885	0.3353	0.3345	0.3291	0.3887	0.3787	0.3649	0.2047	0.2596	0.2227	0.2424	0.2424	0.254	0.257
2480	0.4126	0.412	0.3918	0.3377	0.3368	0.3316	0.3919	0.381	0.3685	0.2067	0.2613	0.2247	0.2442	0.2442	0.256	0.2579
2500	0.4155	0.4154	0.3947	0.3407	0.3408	0.3347	0.3965	0.385	0.3718	0.2084	0.2628	0.2256	0.2456	0.2456	0.2574	0.2601
2520	0.4176	0.4189	0.3973	0.3441	0.3433	0.3377	0.3996	0.387	0.374	0.2098	0.265	0.2273	0.2477	0.2477	0.2592	0.2623
2540	0.4203	0.4218	0.3995	0.3473	0.3449	0.3406	0.4022	0.3895	0.3776	0.2111	0.2674	0.2283	0.2496	0.2496	0.262	0.2642
2560	0.4244	0.4251	0.4036	0.3498	0.3471	0.3437	0.4062	0.3933	0.3802	0.2135	0.2685	0.2299	0.2515	0.2515	0.2645	0.2656
2580	0.4259	0.428	0.4057	0.3522	0.3497	0.347	0.4081	0.3976	0.3845	0.2145	0.2719	0.2321	0.2542	0.2542	0.2658	0.2675
2600	0.4283	0.4291	0.4089	0.3558	0.3526	0.35	0.4127	0.3995	0.3858	0.2154	0.2732	0.2332	0.2555	0.2555	0.2676	0.2686
2620	0.4319	0.4322	0.4103	0.359	0.3537	0.3525	0.4156	0.4017	0.39	0.2172	0.2747	0.2346	0.2578	0.2578	0.2702	0.2697
2640	0.4343	0.4349	0.4134	0.3637	0.3562	0.3556	0.4198	0.4052	0.3923	0.2188	0.276	0.2363	0.2593	0.2593	0.2721	0.2717
2660	0.4363	0.4367	0.4151	0.365	0.3584	0.3568	0.4233	0.4083	0.3944	0.2197	0.2778	0.2383	0.2607	0.2607	0.2735	0.2728
2680	0.4382	0.4392	0.4185	0.3679	0.3617	0.3597	0.4254	0.4101	0.3977	0.2215	0.281	0.2396	0.2621	0.2621	0.2753	0.2744

## Sheet: D
WT_1_noc	WT_2_noc		RASA, mad2Δ_noc_1	RASA, mad2Δ_noc_2		#4-6,RASA_noc_1	#4-6,RASA_noc_2		#4-6in1-3,RASA_noc_1	#4-6in1-3,RASA_noc_2
0.901218	0.901091		0.530058	1.90925		0.952907	0.917097		0.668801	1.0437
0.764099	0.683617		1.2165	1.46694		1.39537	0.918551		1.01961	0.552998
1.19051	1.01531		1.25381	1.6095		0.979633	0.565212		0.712499	1.6178
2.05106	1.26901		1.08828	1.37099		1.39956	1.0083		0.645692	0.74624
0.461219	1.46408		0.973158	1.77538		0.342432	0.78119		0.329697	1.02205
1.68727	1.19858		0.390702	1.30121		1.21064	0.720845		0.643335	1.1174
0.579836	0.846172		1.6543	0.892564		1.31609	0.93375		1.19982	1.8014
0.751058	2.05836		0.807507	0.592824		0.578191	1.40311		0.92544	0.92812
0.510556	0.89549		0.576443	0.963717		0.802267	0.720167		1.23524	0.616488
0.378321	1.74047		0.757614	1.56138		0.863452	1.36011		1.06766	0.340619
1.28646	1.01658		0.203247	0.916085		0.789954	1.75607		1.05727	1.09346
1.6269	0.792057		0.501387	1.3123		0.57427	1.40155		0.891851	0.540798
0.254324	0.863386		1.10861	0.651695		1.35917	1.20024		0.567465
0.257459	0.70874		2.0631	0.882812		0.499916	0.745988		0.658567
0.39076	0.454564		0.768354	0.30286			0.849029
1.43718	1.91261		1.20378	0.775165			1.02374
1.92701	1.7812		0.369834	0.682265			1.37252
0.551351	1.02251		0.886283	0.937738			1.20501
0.555173	0.760715		0.905144	0.805684			0.643046
0.662218	1.16246		0.412265	0.818075
0.485986	0.963612		1.05635	0.62095
0.681799	1.68629		0.678386	0.63704
1.01239	0.940783		0.406208	1.91867
0.849979	0.708511		0.407917	1.9006
0.24723	0.945127		0.124509	0.884488
2.0777	1.70916		1.42288	1.59509
1.39801	0.988237		1.78849	2.08951
0.769704	1.29225		0.683173	0.857392
0.773425	1.79117		0.759956	0.75613
0.540677	1.01163		1.48068	1.55857
0.741983	1.98336		1.19875	1.44199
0.888247	0.709508		1.56774	0.740761
0.570614	2.01108		0.699887	0.778329
1.2128	0.715752		1.49191	1.19537
0.748094	0.971661		1.46696	0.386113
1.05326	0.750558		1.34168	0.419141
1.47377	0.674104		1.65332	0.922259
1.17179	0.644658		1.10111	0.523901
0.909454	0.607903		2.31868	0.677267
0.706994	0.99013		0.672695	0.579056
0.527909	0.845724		0.938627	0.343615
1.55911	0.975217		1.04225	0.660229
	0.93584		0.844829	0.761181
	1.67587		0.380975	0.308019
	0.61194		0.357643	1.16841
	0.879878		0.697001	0.79954
	0.914127		0.710328	0.879598
	0.743035		0.841146	1.13376
	0.636456		1.49465	0.726578
	0.517204		0.61721	0.941838
			1.64017	1.1674
			0.796033
			1.14858
			0.833641
			0.603371
			0.686718

## Sheet: E
WT_1	WT_2		#4-6RASA_1	#4-6RASA_2
0.854473	1.37546		0.331623	0.913738
1.94461	0.940744		0.623681	1.17398
2.57803	0.961301		0.266861	1.25937
1.39094	1.14428		0.175919	0.822018
0.924891	1.3733		0.927541	0.821521
1.40386	0.898995		0.606926	0.837224
1.77138	1.01869		0.85403	0.402746
0.985385	0.705898		0.916238	1.58765
0.7104	0.994681		0.816515	0.788936
1.231	0.325144		1.43111	0.335587
1.06845	0.975796		0.850199	0.3454
0.468896	1.41635		0.471819	0.258045
0.628174	1.32231		0.746329	1.40989
0.524136	1.13235		0.30837	2.49624
1.20184	1.41183		0.670113	0.747749
0.312308	0.514668		0.389905	0.386566
2.14972	0.485043		0.886268	0.514162
0.99812	0.832309		0.627399	0.14079
1.59421	1.25726			0.799524
1.72305	1.33503			0.791154
0.184207	0.687284			0.884743
0.279417	0.607467			0.540965
0.259808	0.779223			0.517702
0.425561	0.688718			0.407098
0.203656	1.68609
0.22383	0.490973
0.353912	0.814736
0.889832	1.06077
1.52103	0.570106
1.11597	1.66189
0.775489	2.08545
0.387164	0.356144
1.16497
2.99243
1.37092
0.58798
0.207183
1.13229
0.761125
1.08972
0.48519
0.215504

## Sheet: F
Time (min)	WT										#4-6										#4-6RASA
0	0.0026	0.0031	0.0035	0.0107	0.0067	0.0058	0.0332	0.0176			0.0221	0.0232	0.0234	0.0326	0.0234	0.0103	0.0509	0.0364			0.0215	0.0226	0.0238	0.0269	0.0261	0.027	0.0478	0.0434	0.0525	0.0397
20	0.0028	0.0035	0.0023	0.0075	0.0058	0.0049	0.0189	0.0157			0.004	0.005	0.0058	0.0106	0.0074	0.0091	0.0176	0.0188			0.0038	0.0049	0.0034	0.0083	0.0056	0.0235	0.017	0.0177	0.0122	0.0115
40	0.0022	0.0033	0.0032	0.0098	0.0049	0.0045	0.0303	0.0228			0.0046	0.006	0.0072	0.0139	0.0087	0.0086	0.0244	0.0172			0.0064	0.0069	0.0057	0.0112	0.007	0.0266	0.0129	0.0139	0.0092	0.0072
60	0.0044	0.0052	0.0049	0.011	0.0084	0.0066	0.0249	0.0232			0.0054	0.0053	0.0082	0.0163	0.0115	0.0089	0.0237	0.0228			0.0058	0.0075	0.0063	0.0091	0.0074	0.0279	0.0233	0.0152	0.0182	0.0111
80	0.0055	0.0075	0.0052	0.0123	0.0099	0.008	0.0333	0.025			0.0064	0.0046	0.0069	0.018	0.0096	0.0096	0.0264	0.0228			0.006	0.0071	0.005	0.01	0.0064	0.0275	0.0264	0.0202	0.0234	0.0154
100	0.0072	0.0088	0.0068	0.0136	0.0121	0.0093	0.039	0.0301			0.0077	0.0055	0.0086	0.0181	0.0109	0.0125	0.0297	0.0266			0.0062	0.0081	0.0062	0.0125	0.0054	0.0304	0.0306	0.0258	0.028	0.0175
120	0.0092	0.0114	0.0086	0.0168	0.0147	0.0116	0.0486	0.0353			0.0082	0.007	0.0103	0.0217	0.0115	0.0152	0.0353	0.0309			0.0078	0.0099	0.0075	0.0154	0.0059	0.0327	0.0367	0.0292	0.0338	0.0214
140	0.0104	0.014	0.0105	0.0211	0.0174	0.0144	0.0568	0.0411			0.0096	0.0089	0.0117	0.0242	0.0143	0.0178	0.0421	0.0366			0.0098	0.0114	0.0086	0.0173	0.0066	0.0345	0.0456	0.0349	0.0415	0.0263
160	0.0143	0.0177	0.0135	0.0269	0.0226	0.0175	0.0698	0.0501			0.0118	0.0107	0.0145	0.0295	0.017	0.0211	0.0506	0.0437			0.012	0.0143	0.0103	0.0217	0.0078	0.0367	0.0557	0.0425	0.0511	0.0329
180	0.0178	0.022	0.0165	0.0322	0.0294	0.022	0.0842	0.0588			0.0143	0.0135	0.0182	0.034	0.0218	0.0258	0.0616	0.0523			0.0149	0.0177	0.0115	0.0252	0.0105	0.0396	0.0674	0.0498	0.063	0.0398
200	0.022	0.0271	0.0208	0.0396	0.0357	0.0267	0.1029	0.0724			0.0176	0.0159	0.0229	0.0394	0.027	0.0309	0.075	0.0629			0.0183	0.0211	0.0138	0.0286	0.0119	0.0439	0.0805	0.0597	0.0766	0.0487
220	0.027	0.0342	0.0267	0.048	0.0426	0.0328	0.1257	0.0878			0.0215	0.0197	0.0294	0.0461	0.0312	0.0372	0.0898	0.0754			0.0226	0.0263	0.0181	0.0326	0.0134	0.0475	0.0963	0.071	0.094	0.0593
240	0.035	0.0415	0.033	0.0576	0.0517	0.0397	0.1535	0.1091			0.0278	0.0234	0.036	0.0548	0.0376	0.0437	0.1093	0.091			0.0291	0.0306	0.0219	0.0381	0.0153	0.0521	0.1169	0.0854	0.1145	0.0727
260	0.0428	0.0508	0.0406	0.0705	0.0625	0.0486	0.1853	0.1332			0.0333	0.0283	0.0439	0.0653	0.045	0.0523	0.1323	0.1105			0.0353	0.036	0.0264	0.0443	0.0176	0.0587	0.1397	0.1025	0.1395	0.0878
280	0.0516	0.0617	0.0493	0.0858	0.0763	0.0596	0.2245	0.1612			0.0398	0.0337	0.0528	0.0794	0.0536	0.0626	0.1604	0.1325			0.0408	0.0418	0.0316	0.0522	0.0204	0.0657	0.1669	0.1231	0.1673	0.1067
300	0.0635	0.0751	0.0596	0.1045	0.0925	0.0744	0.2647	0.1952			0.0483	0.0407	0.0641	0.0953	0.0645	0.0766	0.1918	0.1588			0.0477	0.049	0.0376	0.0613	0.0238	0.0745	0.196	0.1469	0.2005	0.1279
320	0.0776	0.0921	0.0734	0.1283	0.1129	0.0911	0.309	0.2297			0.0586	0.0488	0.0767	0.1152	0.0773	0.0923	0.2277	0.1871			0.0558	0.0574	0.0443	0.0717	0.0277	0.0835	0.2296	0.1723	0.2375	0.1526
340	0.0954	0.1122	0.0882	0.1508	0.1351	0.1074	0.3538	0.2693			0.0715	0.0586	0.0944	0.1412	0.0918	0.1096	0.2663	0.2216			0.0649	0.0672	0.0527	0.0863	0.0324	0.0942	0.265	0.2032	0.276	0.1813
360	0.1161	0.1374	0.1083	0.1867	0.1665	0.1338	0.4025	0.3139			0.0863	0.0713	0.114	0.166	0.1126	0.135	0.3085	0.2577			0.0758	0.079	0.0621	0.1	0.0377	0.109	0.3037	0.2362	0.3149	0.2125
380	0.1416	0.1668	0.132	0.2229	0.2003	0.162	0.4564	0.3603			0.1049	0.0858	0.1381	0.1979	0.1355	0.1614	0.3529	0.2962			0.089	0.093	0.0731	0.1172	0.044	0.1248	0.3434	0.272	0.3572	0.246
400	0.1717	0.1997	0.1581	0.2607	0.2382	0.1911	0.5077	0.4085			0.1284	0.1024	0.1684	0.2372	0.1611	0.1921	0.3992	0.3368			0.1039	0.1079	0.0863	0.1383	0.052	0.144	0.3849	0.3092	0.4014	0.2831
420	0.2066	0.2419	0.1919	0.3092	0.2829	0.2325	0.5565	0.4563			0.1554	0.1261	0.199	0.2754	0.1927	0.2302	0.4495	0.3812			0.1218	0.1273	0.1005	0.1594	0.0604	0.1653	0.4232	0.3471	0.4457	0.3206
440	0.2466	0.2854	0.2269	0.3569	0.3299	0.2748	0.6054	0.5035			0.1874	0.151	0.2399	0.3216	0.2299	0.2706	0.4963	0.4256			0.1411	0.1483	0.1173	0.1853	0.0704	0.1889	0.4638	0.3865	0.4878	0.3598
460	0.2876	0.3306	0.2676	0.4047	0.3767	0.3211	0.6463	0.5493			0.2224	0.1799	0.2806	0.3681	0.2696	0.3159	0.542	0.4687			0.1614	0.1695	0.1361	0.2111	0.0806	0.2164	0.5073	0.4275	0.5292	0.4006
480	0.3316	0.3779	0.3122	0.4536	0.4265	0.3644	0.6861	0.5853			0.2616	0.2135	0.327	0.4173	0.3126	0.3615	0.5884	0.5096			0.1861	0.1941	0.1578	0.2403	0.0934	0.2448	0.5467	0.4647	0.5742	0.441
500	0.3766	0.4258	0.3576	0.505	0.4745	0.4156	0.7219	0.6239			0.3047	0.2507	0.3723	0.4618	0.3561	0.4128	0.6305	0.5533			0.212	0.2247	0.1809	0.2703	0.1089	0.2797	0.5854	0.5057	0.6094	0.4809
520	0.4227	0.4771	0.4022	0.5511	0.524	0.4603	0.752	0.6567			0.3499	0.2906	0.4235	0.5158	0.4002	0.4579	0.667	0.5908			0.2378	0.2515	0.2064	0.3048	0.1265	0.3123	0.6239	0.5441	0.6455	0.5171
540	0.4686	0.5275	0.4509	0.6015	0.5734	0.5188	0.7804	0.6867			0.3955	0.3347	0.4719	0.561	0.4494	0.5132	0.7013	0.6233			0.2681	0.284	0.2332	0.3346	0.1449	0.3483	0.6549	0.5789	0.6788	0.5553
560	0.5152	0.5725	0.4971	0.6424	0.6176	0.5579	0.8063	0.7117			0.4443	0.378	0.5279	0.6125	0.4935	0.556	0.7312	0.6529			0.2949	0.3106	0.263	0.3703	0.168	0.3796	0.6884	0.6131	0.7092	0.588
580	0.5589	0.6183	0.5489	0.6847	0.6615	0.6061	0.8309	0.7379			0.491	0.4253	0.5745	0.6571	0.543	0.6059	0.7564	0.6802			0.3246	0.3437	0.2912	0.4045	0.1879	0.4206	0.7183	0.6454	0.7387	0.6193
600	0.5997	0.6607	0.5915	0.728	0.7019	0.6549	0.8502	0.754			0.5351	0.4729	0.6211	0.6943	0.5906	0.6532	0.7812	0.7019			0.3563	0.3762	0.3219	0.4361	0.211	0.4567	0.7465	0.6714	0.768	0.6463
620	0.6394	0.7014	0.6344	0.7627	0.7379	0.6941	0.8672	0.7749			0.5808	0.5201	0.6657	0.7342	0.6336	0.6929	0.8021	0.7265			0.3854	0.4035	0.3541	0.468	0.2351	0.491	0.7712	0.699	0.7922	0.6742
640	0.6731	0.7366	0.6722	0.7948	0.7686	0.7292	0.885	0.7923			0.6181	0.5634	0.7074	0.7699	0.671	0.7293	0.8213	0.744			0.4158	0.4346	0.3852	0.5011	0.2612	0.5265	0.7937	0.7246	0.8154	0.6955
660	0.703	0.7689	0.7101	0.8267	0.8007	0.7652	0.8956	0.8038			0.6557	0.6015	0.7447	0.7997	0.7077	0.7656	0.8379	0.7594			0.4476	0.4675	0.4172	0.5308	0.2872	0.5655	0.8197	0.7453	0.8365	0.7173
680	0.7335	0.7971	0.7401	0.8536	0.8302	0.7921	0.9068	0.8142			0.6915	0.6357	0.7789	0.8311	0.7397	0.7942	0.8525	0.7755			0.4749	0.4962	0.4489	0.562	0.3128	0.595	0.8393	0.7681	0.8539	0.7372
700	0.7584	0.825	0.7697	0.8799	0.854	0.822	0.9165	0.8221			0.7197	0.6711	0.8117	0.8567	0.7702	0.8259	0.864	0.7869			0.5059	0.5276	0.4797	0.5888	0.3387	0.6366	0.8593	0.7845	0.8719	0.7518
720	0.7846	0.8494	0.7979	0.9034	0.8766	0.847	0.923	0.8291			0.7501	0.7014	0.8388	0.8817	0.7981	0.8522	0.8739	0.7962			0.5336	0.5569	0.511	0.6188	0.366	0.6677	0.8732	0.7998	0.8847	0.7629
740	0.8089	0.8707	0.8235	0.9226	0.8958	0.8656	0.9261	0.8347			0.7798	0.7269	0.8648	0.9054	0.8231	0.8718	0.8797	0.803			0.5613	0.5831	0.5415	0.6484	0.3949	0.6935	0.8856	0.8108	0.8913	0.7734
760	0.831	0.894	0.8478	0.9435	0.9163	0.8866	0.9283	0.8382			0.8021	0.7571	0.8893	0.9266	0.8473	0.895	0.8847	0.8109			0.586	0.6096	0.5712	0.6752	0.4195	0.7233	0.8938	0.8177	0.8975	0.78
780	0.8512	0.912	0.869	0.9629	0.9363	0.9072	0.9301	0.838			0.8257	0.7793	0.9116	0.9474	0.8696	0.9158	0.8899	0.8125			0.6105	0.6405	0.5997	0.7018	0.4459	0.753	0.8985	0.8228	0.9027	0.7847
800	0.8699	0.9326	0.8906	0.9796	0.9548	0.9258	0.9311	0.8399			0.8469	0.8028	0.9336	0.9663	0.8908	0.9335	0.8915	0.8161			0.6387	0.6656	0.6303	0.7307	0.4717	0.7823	0.9028	0.8264	0.9046	0.79
820	0.8868	0.9511	0.9104	0.9962	0.9708	0.9436	0.9332	0.842			0.8675	0.8239	0.9537	0.9842	0.9096	0.9517	0.8928	0.8184			0.6611	0.6894	0.6578	0.7546	0.5013	0.806	0.9055	0.8314	0.9062	0.7928
840	0.9039	0.9676	0.9274	1.0117	0.9849	0.9594	0.9339	0.8444			0.8874	0.8426	0.9742	1.0032	0.9255	0.9697	0.895	0.8197			0.689	0.7178	0.6873	0.7817	0.5289	0.8337	0.9066	0.8344	0.9088	0.795
860	0.9144	0.9805	0.9444	1.0255	0.9971	0.9773	0.9357	0.8466			0.9018	0.8617	0.9893	1.0156	0.9424	0.9874	0.8956	0.8221			0.714	0.7384	0.712	0.8013	0.5524	0.8593	0.9057	0.8365	0.908	0.7958
880	0.9265	0.9923	0.9569	1.0346	1.0088	0.9869	0.9351	0.8462			0.9167	0.8754	1.0071	1.0311	0.9572	0.9987	0.8976	0.8236			0.733	0.761	0.7378	0.8261	0.576	0.878	0.9071	0.8365	0.9105	0.7967
900	0.9321	1.0013	0.9692	1.0444	1.0177	0.9977	0.9357	0.8466			0.9288	0.8922	1.0171	1.0401	0.9695	1.0111	0.8996	0.8244			0.7566	0.785	0.76	0.8455	0.6003	0.8987	0.909	0.8375	0.9126	0.798
920	0.9381	1.007	0.9787	1.0487	1.0235	1.0033	0.9369	0.8476			0.9401	0.9028	1.0294	1.0507	0.9804	1.0191	0.9	0.8254			0.7762	0.8035	0.7852	0.8681	0.6251	0.9177	0.9105	0.8384	0.9122	0.8001
940	0.941	1.0118	0.9872	1.0521	1.0272	1.007	0.9372	0.8494			0.9464	0.9104	1.036	1.0576	0.988	1.0269	0.9007	0.8266			0.7959	0.8251	0.8072	0.8891	0.6468	0.9381	0.9114	0.839	0.9133	0.8
960	0.9446	1.0134	0.9928	1.0533	1.0279	1.0103	0.9378	0.8501			0.9517	0.9163	1.0416	1.062	0.9936	1.0312	0.9019	0.8277			0.8156	0.8447	0.8268	0.9078	0.6678	0.9539	0.9117	0.8408	0.9139	0.8003
980	0.9465	1.0152	0.9966	1.0556	1.0293	1.0141	0.9389	0.8511			0.9535	0.9224	1.0449	1.0651	0.9972	1.0345	0.9025	0.8296			0.8349	0.861	0.8479	0.9249	0.6886	0.9737	0.9125	0.8432	0.9139	0.8013
1000	0.9479	1.0172	1.0009	1.0591	1.0299	1.0162	0.9402	0.8512			0.956	0.9273	1.0452	1.0656	1.0004	1.0361	0.9035	0.8299			0.8501	0.8762	0.8651	0.9394	0.7041	0.9875	0.914	0.8442	0.9147	0.8031
1020	0.9483	1.0177	1.0018	1.0605	1.0306	1.0182	0.9412	0.8531			0.9576	0.9308	1.0475	1.0662	1.0015	1.0388	0.9052	0.8332			0.8724	0.8969	0.8866	0.9553	0.7259	1.0048	0.9133	0.8458	0.9138	0.8033
1040	0.9496	1.0179	1.0019	1.0571	1.0318	1.0182	0.9414	0.8524			0.9611	0.9315	1.0493	1.0698	1.0025	1.0389	0.9053	0.833			0.8873	0.9125	0.9045	0.9767	0.744	1.0152	0.916	0.8461	0.9167	0.8038
1060	0.9508	1.0178	1.0024	1.0585	1.0321	1.0186	0.9413	0.8535			0.9611	0.9326	1.0507	1.071	1.0047	1.0399	0.9074	0.8346			0.9038	0.9286	0.921	0.9901	0.761	1.0206	0.9175	0.847	0.9175	0.8049
1080	0.9514	1.0188	1.0047	1.0596	1.0325	1.0202	0.9413	0.8537			0.9614	0.9348	1.0505	1.0692	1.0052	1.0415	0.9083	0.8352			0.9174	0.9437	0.9358	0.9979	0.7757	1.0268	0.9182	0.848	0.9185	0.8057
1100	0.9536	1.0198	1.0047	1.0601	1.0326	1.0188	0.9433	0.8567			0.9619	0.938	1.0513	1.0705	1.006	1.0415	0.9093	0.8371			0.9251	0.9505	0.9469	1.0073	0.7881	1.0308	0.9181	0.8502	0.9178	0.8073
1120	0.9536	1.0181	1.0038	1.06	1.0327	1.0189	0.9435	0.8556			0.9638	0.9363	1.0543	1.0723	1.0053	1.0413	0.9107	0.837			0.9328	0.9598	0.958	1.0132	0.7992	1.0316	0.9198	0.8502	0.9203	0.8078
1140	0.9538	1.02	1.0056	1.0587	1.0338	1.0191	0.9443	0.8581			0.9642	0.9378	1.0543	1.075	1.0075	1.0426	0.911	0.8387			0.9385	0.9649	0.9659	1.0189	0.8051	1.0368	0.9194	0.852	0.9197	0.8082
1160	0.9554	1.0201	1.0063	1.0603	1.0343	1.0188	0.9448	0.8564			0.966	0.9392	1.0546	1.0748	1.0086	1.0432	0.9128	0.8389			0.9419	0.969	0.9693	1.0201	0.8095	1.0381	0.9209	0.853	0.9218	0.81
1180	0.9547	1.0204	1.0076	1.0623	1.0339	1.0217	0.945	0.8573			0.9658	0.9405	1.0542	1.0733	1.0096	1.0446	0.9131	0.8402			0.9449	0.9711	0.9713	1.0185	0.8132	1.0387	0.9221	0.8534	0.9224	0.8108
1200	0.9554	1.0202	1.0069	1.061	1.0352	1.0195	0.9461	0.8566			0.9666	0.9412	1.0568	1.0754	1.0101	1.0438	0.9143	0.8411			0.9472	0.9727	0.9748	1.0236	0.8157	1.0393	0.9227	0.8533	0.9239	0.8121
1220	0.9551	1.0211	1.008	1.0613	1.036	1.02	0.9471	0.8592			0.9674	0.9427	1.0555	1.076	1.0099	1.0436	0.9146	0.8436			0.9471	0.9738	0.976	1.0234	0.817	1.0386	0.9227	0.8546	0.9232	0.8135
1240	0.9556	1.0213	1.0071	1.0607	1.0364	1.0206	0.9479	0.8601			0.9682	0.9431	1.0566	1.0778	1.0102	1.0442	0.9149	0.844			0.9472	0.9761	0.9761	1.0251	0.8181	1.0387	0.9234	0.8558	0.9238	0.8144
1260	0.9564	1.0227	1.0096	1.0627	1.0373	1.0217	0.9485	0.8612			0.9684	0.9445	1.056	1.0772	1.0126	1.0451	0.9152	0.8452			0.9488	0.9759	0.9758	1.0231	0.8191	1.0386	0.9239	0.8565	0.9244	0.8151
1280	0.957	1.0233	1.0095	1.0626	1.0381	1.0215	0.9497	0.8609			0.9688	0.946	1.0563	1.0778	1.0138	1.0454	0.9166	0.8455			0.9482	0.9747	0.9763	1.0247	0.8198	1.0392	0.9247	0.8575	0.9251	0.8163
1300	0.9584	1.0234	1.0095	1.0634	1.0373	1.0208	0.9497	0.8617			0.9702	0.9461	1.0578	1.0778	1.0134	1.045	0.9171	0.8459			0.9491	0.9763	0.9765	1.0247	0.8201	1.0396	0.9247	0.8578	0.9256	0.8165
1320	0.959	1.0242	1.01	1.0625	1.0378	1.0215	0.9486	0.8605			0.9715	0.9479	1.0586	1.0799	1.0141	1.0459	0.9174	0.8455			0.9493	0.977	0.9777	1.0267	0.8206	1.0398	0.9265	0.858	0.9282	0.8165
1340	0.9595	1.0244	1.0106	1.0617	1.0389	1.0217	0.95	0.8631			0.9717	0.9484	1.0598	1.0812	1.0156	1.0465	0.9184	0.8478			0.95	0.9771	0.9786	1.0289	0.8212	1.0404	0.9261	0.8598	0.927	0.8175
1360	0.9594	1.0255	1.012	1.0639	1.038	1.0235	0.9496	0.8613			0.9714	0.9502	1.0591	1.0795	1.0161	1.0477	0.9188	0.8475			0.9512	0.9772	0.9775	1.0254	0.8202	1.0406	0.9278	0.8598	0.9296	0.8176
1380	0.9601	1.0267	1.0132	1.0643	1.0383	1.0232	0.951	0.8642			0.9726	0.9513	1.0594	1.0803	1.0166	1.0481	0.9196	0.8497			0.9503	0.9771	0.9777	1.0252	0.8204	1.0407	0.9276	0.8617	0.9288	0.8193
1400	0.9605	1.026	1.0128	1.0632	1.0394	1.0225	0.951	0.864			0.9738	0.9513	1.0609	1.083	1.0167	1.0478	0.9204	0.8497			0.9493	0.9778	0.9793	1.028	0.8225	1.041	0.9287	0.8625	0.9297	0.8205
1420	0.9614	1.0268	1.0132	1.0632	1.0401	1.0216	0.952	0.8649			0.9749	0.9527	1.0617	1.0839	1.0175	1.0478	0.9212	0.8507			0.9499	0.9767	0.979	1.0287	0.8225	1.0401	0.9293	0.8627	0.9303	0.8217
1440	0.962	1.0274	1.014	1.0636	1.0401	1.0229	0.9517	0.8635			0.9758	0.9525	1.0628	1.0845	1.0186	1.0488	0.9219	0.8495			0.9506	0.9771	0.9803	1.0291	0.8217	1.041	0.9314	0.8625	0.9324	0.8219
