# Supplementary material for: The copy-number and varied strengths of MELT motifs in Spc105 balance the strength and responsiveness of the spindle assembly checkpoint
Source: eLife. 2020 Jun 1;9:e55096. doi: 10.7554/eLife.55096 (PMC7292645; doi:10.7554/eLife.55096)
Supplement: Figure 5—source data 1. — Individual pages were created in this file for each subfigure. [file elife-55096-fig5-data1.xlsx]

## Sheet: 5A_middle
WT	WT_mad1Δ_1	WT_mad1Δ_2	AllMELT_1	AllMELT_2	AllMELTmad1Δ_1	AllMELTmad1Δ_2
148.145	140.079	137.394	181.234	176.557	138.341	147.059
150.215	146.06	142.804	170.943	175.733	140.079	141.064
151.882	132.379	137.457	151.423	169.308	143.348	159.528
147.419	143.965	139.301	158.437		144.31	139.949
152.498	145.566	148.364	166.683		164.587	162.543
144.656	132.031	133.14	156.786		148.73	141.928
137.331			144.31
140.8			158.604
141.064			150.365
140.34			166.683
129.142			163.248
140.144			166.315

## Sheet: 5A_right
Time(min)		WT_1	WT_2	WT_3		AllMelt_1_1	AllMelt_1_2	AllMelt_1_3		AllMelt_2_1	AllMelt_2_2	AllMelt_2_3
0		0.0177	0.017	0.0249		0.0314	0.0173	0.0243		0.0184	0.0177	0.0216
20		0.0191	0.0194	0.0271		0.0333	0.0213	0.0251		0.0208	0.0246	0.0232
40		0.0195	0.0211	0.0295		0.0394	0.0269	0.0278		0.0227	0.0244	0.0239
60		0.0242	0.0224	0.0347		0.0379	0.0237	0.0295		0.0244	0.0227	0.0283
80		0.0295	0.0236	0.0328		0.0363	0.0219	0.0295		0.0236	0.024	0.0293
100		0.0331	0.0301	0.0391		0.0389	0.026	0.0351		0.027	0.0278	0.0322
120		0.0382	0.0344	0.0424		0.042	0.0274	0.0371		0.0301	0.0311	0.0353
140		0.0446	0.0405	0.0468		0.0449	0.0314	0.0415		0.0339	0.0359	0.0388
160		0.0503	0.0462	0.0523		0.0496	0.035	0.046		0.0382	0.0412	0.0438
180		0.0583	0.0526	0.0584		0.0553	0.0393	0.0516		0.0441	0.0471	0.0501
200		0.067	0.0602	0.066		0.0613	0.0444	0.0579		0.0504	0.0535	0.057
220		0.0757	0.0684	0.0747		0.0677	0.0505	0.0658		0.0563	0.061	0.0646
240		0.0843	0.0773	0.0825		0.0739	0.0569	0.073		0.0628	0.0682	0.0718
260		0.0937	0.085	0.0903		0.0804	0.063	0.0796		0.0695	0.0759	0.0793
280		0.1026	0.0929	0.0985		0.0863	0.0684	0.0875		0.0752	0.0827	0.0863
300		0.112	0.1005	0.1061		0.0925	0.0737	0.0946		0.0819	0.0896	0.0935
320		0.121	0.1086	0.1139		0.0985	0.0794	0.1012		0.0875	0.0963	0.1005
340		0.1296	0.1157	0.122		0.1042	0.0847	0.1083		0.0932	0.1029	0.1077
360		0.1381	0.1236	0.1292		0.1098	0.0901	0.1149		0.0986	0.1101	0.1146
380		0.1471	0.1308	0.1363		0.1163	0.0957	0.1209		0.1053	0.1169	0.1214
400		0.1552	0.1393	0.1426		0.1221	0.1013	0.1269		0.1108	0.1242	0.1276
420		0.1643	0.147	0.1516		0.1282	0.1066	0.134		0.1167	0.131	0.1344
440		0.1728	0.1547	0.1579		0.1338	0.1121	0.1414		0.123	0.1376	0.1406
460		0.1828	0.1632	0.1652		0.1406	0.1181	0.1485		0.1296	0.145	0.1478
480		0.1915	0.1722	0.1722		0.1469	0.1244	0.1551		0.135	0.1526	0.1543
500		0.2001	0.1801	0.1801		0.1537	0.1303	0.1623		0.1414	0.1589	0.161
520		0.2088	0.1885	0.1874		0.1602	0.1371	0.1702		0.1471	0.1674	0.1671
540		0.2176	0.1963	0.1952		0.1673	0.1434	0.1773		0.1528	0.1738	0.1739
560		0.2264	0.2045	0.2038		0.1742	0.1495	0.1861		0.1575	0.1816	0.1809
580		0.237	0.2133	0.2127		0.1822	0.1559	0.194		0.1639	0.1895	0.1876
600		0.2475	0.2216	0.2187		0.1893	0.1621	0.2003		0.1714	0.1972	0.1941
620		0.2586	0.2309	0.226		0.1969	0.1694	0.2071		0.1778	0.2041	0.2025
640		0.2692	0.2409	0.2361		0.2041	0.1767	0.2172		0.1831	0.2118	0.2086
660		0.2801	0.2495	0.2428		0.2126	0.185	0.2241		0.1907	0.2212	0.2164
680		0.2907	0.2598	0.2545		0.2207	0.1924	0.2332		0.1954	0.2306	0.2224
700		0.3017	0.2681	0.2634		0.2301	0.2	0.2427		0.2015	0.238	0.23
720		0.3129	0.2786	0.27		0.2401	0.2078	0.2495		0.2114	0.2483	0.2374
740		0.3247	0.2893	0.2831		0.2476	0.2168	0.2609		0.2176	0.2551	0.245
760		0.3371	0.2994	0.2923		0.2578	0.2257	0.271		0.2241	0.2649	0.2522
780		0.3508	0.3119	0.3017		0.2679	0.2345	0.2809		0.2315	0.2763	0.2613
800		0.3632	0.322	0.311		0.277	0.2443	0.292		0.2387	0.2855	0.2702
820		0.38	0.3341	0.3211		0.2879	0.2541	0.3005		0.2483	0.2966	0.2813
840		0.3935	0.3476	0.3349		0.2984	0.264	0.3128		0.2555	0.3066	0.2891
860		0.4102	0.3605	0.3448		0.3107	0.2763	0.3223		0.2655	0.3175	0.2993
880		0.4238	0.3722	0.3566		0.322	0.2877	0.3353		0.2709	0.327	0.3094
900		0.4393	0.386	0.3667		0.3357	0.2998	0.344		0.2823	0.3387	0.3203
920		0.4536	0.3993	0.3793		0.3464	0.3133	0.3575		0.2904	0.3497	0.3312
940		0.4676	0.4144	0.3971		0.3591	0.3255	0.373		0.2994	0.3632	0.3412
960		0.4852	0.4282	0.4064		0.372	0.3386	0.3862		0.3116	0.3762	0.3549
980		0.5027	0.4438	0.4241		0.3857	0.3521	0.4012		0.3204	0.388	0.3656
1000		0.5189	0.4595	0.4357		0.3976	0.3649	0.414		0.3326	0.4034	0.3787
1020		0.5412	0.477	0.4491		0.4127	0.3798	0.427		0.3446	0.4174	0.3935
1040		0.5586	0.4932	0.4664		0.4277	0.3961	0.4439		0.353	0.433	0.4056
1060		0.5787	0.5124	0.4806		0.4443	0.4123	0.4564		0.3704	0.449	0.4214
1080		0.5971	0.5309	0.4984		0.4597	0.4282	0.4742		0.381	0.4644	0.4347
1100		0.6184	0.5496	0.5134		0.4778	0.4435	0.4872		0.3966	0.4809	0.4503
1120		0.6408	0.5677	0.5324		0.4937	0.4608	0.5057		0.4086	0.4963	0.4639
1140		0.6622	0.5869	0.551		0.5099	0.4782	0.522		0.4237	0.5123	0.4839
1160		0.6817	0.608	0.5709		0.5286	0.4988	0.5423		0.4354	0.5312	0.496
1180		0.7025	0.6281	0.5864		0.5456	0.5146	0.5591		0.4537	0.5493	0.5171
1200		0.7269	0.6482	0.6085		0.5643	0.5338	0.5796		0.4645	0.5686	0.5325
1220		0.7459	0.669	0.6321		0.5811	0.5551	0.6006		0.4734	0.5856	0.5483
1240		0.7723	0.6879	0.6491		0.6028	0.5736	0.6174		0.4991	0.6084	0.5669
1260		0.7931	0.7124	0.6646		0.6223	0.5926	0.6328		0.5202	0.6303	0.5878
1280		0.8139	0.7305	0.6893		0.6424	0.6132	0.6572		0.533	0.6487	0.6058
1300		0.8352	0.7542	0.7058		0.6589	0.6332	0.6746		0.5551	0.6702	0.632
1320		0.8545	0.773	0.7292		0.6782	0.6545	0.6975		0.569	0.6897	0.6467
1340		0.8747	0.7937	0.7452		0.6976	0.6724	0.7122		0.5937	0.7124	0.6722
1360		0.8911	0.8127	0.7665		0.714	0.6917	0.7363		0.6085	0.7317	0.6887
1380		0.9088	0.8296	0.7803		0.732	0.7117	0.7514		0.6327	0.7522	0.7109
1400		0.922	0.8476	0.8014		0.7447	0.729	0.7731		0.6458	0.7725	0.7277
1420		0.9312	0.8633	0.8182		0.7587	0.7437	0.7894		0.6642	0.7902	0.747
1440		0.9399	0.8736	0.8266		0.7685	0.7562	0.798		0.6866	0.8074	0.7676
1460		0.9451	0.8804	0.8366		0.7767	0.765	0.8072		0.702	0.8204	0.7864
1480		0.9478	0.8873	0.8464		0.7815	0.7731	0.82		0.7074	0.8293	0.7927
1500		0.9516	0.8904	0.848		0.7897	0.7778	0.8204		0.72	0.8347	0.8067
1520		0.9541	0.896	0.8525		0.7918	0.7823	0.8257		0.7254	0.8394	0.8127
1540		0.9555	0.899	0.8598		0.7932	0.7846	0.833		0.7262	0.8424	0.8158
1560		0.957	0.9004	0.8588		0.7967	0.7878	0.8311		0.7344	0.8478	0.8217
1580		0.9572	0.9026	0.8616		0.7968	0.7913	0.8319		0.7387	0.8506	0.8281
1600		0.9591	0.904	0.865		0.7996	0.7916	0.8362		0.7389	0.8515	0.8292
1620		0.9592	0.9046	0.8702		0.7995	0.7926	0.8414		0.7345	0.8533	0.8269
1640		0.9601	0.9057	0.87		0.8012	0.7947	0.8431		0.7383	0.8571	0.828
1660		0.9622	0.9064	0.867		0.804	0.7948	0.8392		0.7434	0.8579	0.8346
1680		0.9612	0.9069	0.8708		0.8027	0.7961	0.8448		0.7392	0.8568	0.834
1700		0.962	0.908	0.8681		0.8046	0.7972	0.8427		0.745	0.8581	0.8384
1720		0.9615	0.9076	0.874		0.8044	0.7989	0.8477		0.7398	0.8587	0.8355
1740		0.9618	0.9094	0.873		0.8057	0.7984	0.8485		0.7387	0.8581	0.8356
1760		0.9631	0.9099	0.869		0.8077	0.7993	0.8469		0.7452	0.8602	0.8393
1780		0.9637	0.9097	0.8704		0.8084	0.8005	0.847		0.7483	0.8608	0.8424
1800		0.964	0.9114	0.8754		0.806	0.8016	0.8527		0.7435	0.8611	0.8403
1820		0.9649	0.9114	0.8718		0.8079	0.8019	0.8488		0.7494	0.8622	0.8447
1840		0.9636	0.9124	0.8776		0.8076	0.8031	0.8542		0.746	0.8627	0.8422
1860		0.9628	0.9123	0.8798		0.8064	0.8027	0.857		0.7353	0.8618	0.842
1880		0.9657	0.9123	0.8765		0.8096	0.8036	0.8558		0.7466	0.8627	0.8441
1900		0.9669	0.9128	0.8738		0.8112	0.8045	0.8532		0.7512	0.865	0.847
1920		0.9662	0.9132	0.8771		0.8096	0.8059	0.8575		0.7486	0.8652	0.8427
1940		0.9662	0.9138	0.8799		0.8115	0.8036	0.8586		0.7477	0.8647	0.844
1960		0.9656	0.9142	0.8826		0.8076	0.8065	0.8632		0.74	0.8643	0.841
1980		0.9679	0.9149	0.8744		0.8139	0.8073	0.8558		0.7549	0.8672	0.8489
2000		0.9675	0.9155	0.8786		0.8127	0.8075	0.8604		0.7502	0.8671	0.8456
2020		0.9681	0.9151	0.8746		0.8157	0.8081	0.8566		0.7568	0.8693	0.8496
2040		0.968	0.9166	0.8794		0.8143	0.8092	0.8609		0.7508	0.8695	0.8466
2060		0.9686	0.9163	0.8771		0.8161	0.81	0.8579		0.757	0.8719	0.851
2080		0.9695	0.9165	0.8788		0.816	0.8106	0.8578		0.7545	0.8708	0.8499
2100		0.969	0.9176	0.8818		0.815	0.8094	0.8631		0.7506	0.8697	0.8478
2120		0.9695	0.9169	0.8785		0.8155	0.8106	0.8603		0.755	0.8722	0.8509
2140		0.9694	0.9184	0.8826		0.8153	0.8109	0.8637		0.7504	0.8714	0.8486
2160		0.9692	0.9184	0.8799		0.8158	0.8111	0.859		0.7554	0.8727	0.8517
2180		0.9701	0.9184	0.8808		0.8168	0.8122	0.8593		0.7584	0.8736	0.8534
2200		0.9693	0.9185	0.8818		0.8159	0.8124	0.8599		0.7565	0.8738	0.8534
2220		0.9693	0.9199	0.8822		0.818	0.8136	0.8606		0.7593	0.8749	0.855
2240		0.9689	0.92	0.8824		0.8172	0.8137	0.861		0.7567	0.8743	0.8538
2260		0.9701	0.9202	0.8815		0.8189	0.8134	0.8607		0.7593	0.8753	0.8555
2280		0.9694	0.9208	0.886		0.8168	0.8146	0.8653		0.7538	0.875	0.8527
2300		0.9704	0.9205	0.8814		0.8182	0.8137	0.8615		0.7594	0.876	0.8559
2320		0.9698	0.9211	0.882		0.8192	0.8133	0.8623		0.7578	0.8757	0.8557
2340		0.9709	0.921	0.8818		0.8197	0.8148	0.8608		0.7606	0.8771	0.8579
2360		0.9709	0.9216	0.8827		0.8191	0.8144	0.8618		0.7581	0.8762	0.8567
2380		0.9702	0.9224	0.887		0.8189	0.8141	0.867		0.7536	0.8759	0.8544
2400		0.971	0.9216	0.8838		0.8203	0.8145	0.8628		0.7598	0.8767	0.8568
2420		0.9721	0.9213	0.8835		0.8216	0.8158	0.8629		0.7629	0.8779	0.8595
2440		0.9716	0.9223	0.8839		0.821	0.8152	0.8639		0.7599	0.878	0.8583
2460		0.9729	0.923	0.8841		0.8219	0.8161	0.8643		0.7643	0.8782	0.8601

## Sheet: 5B_right
WT_R+G	WT,prGal1-Bub1_R+G_1	WT,prGal1-Bub1_R+G_2	AllMELT_R+G_1	AllMELT_R+G_2	AllMELT, prGal1-Bub1_R+G_1	AllMELT, prGal1-Bub1_R+G_2	WT_G	WT, prGal1-Bub1_G	AllMELT_G	AllMELT, prGal1-Bub1_G
313.834	357.306	351.63	316.175	314.786	531.386	400.572	1815.62	2134.97	1825.53	3773.25
309.542	322.336	401.641	311.206	345.535	463.908	397.609	1853.63	2243.14	1959.83	3039.79
312.954	323.619	323.132	299.235	284.797	469.186	375.771	1947.15	2171.93	1976.56	3361.59
294.55					429.736	463.98				3124.66
293.688					445.772	420.315				2965.81
289.174					334.775	318.315				3060.8
