# Supplementary material for: The copy-number and varied strengths of MELT motifs in Spc105 balance the strength and responsiveness of the spindle assembly checkpoint
Source: eLife. 2020 Jun 1;9:e55096. doi: 10.7554/eLife.55096 (PMC7292645; doi:10.7554/eLife.55096)
Supplement: Figure 6—source data 1. — Individual pages were created in this file for each subfigure. [file elife-55096-fig6-data1.xlsx]

## Sheet: 6B
WT_noc	#4-6RASA_noc	WT _meta	#4-6, RASA_meta
0.901218	0.952907	0.109935	0.215164
0.764099	1.39537	-0.05304	0.238798
1.19051	0.979633	-0.05753	0.554379
2.05106	1.39956	0.143086	0.492995
0.461219	0.342432	0.129077	0.35686
1.68727	1.21064	0.051652	0.392258
0.579836	1.31609	0.100631	0.02342
0.751058	0.578191	0.103091	-0.06021
0.510556	0.802267	0.026307	-0.00396
0.378321	0.863452	0.053363	0.281681
1.28646	0.789954	0.057213	0.285959
1.6269	0.57427	-0.11186	0.085766
0.254324	1.35917	0.068656	-0.0401
0.257459	0.499916	0.066945	0.29815
0.39076	0.917097	0.019035	0.218372
1.43718	0.918551	-0.09261	0.102342
1.92701	0.565212	0.086194	0.083841
0.551351	1.0083	0.219121	0.323174
0.555173	0.78119	-0.08962	0.157844
0.662218	0.720845	-0.04951	0.116672
0.485986	0.93375	-0.03433	0.16533
0.681799	1.40311	0.119346	0.325634
1.01239	0.720167	0.047588	-0.24939
0.849979	1.36011	0.199765	-0.07839
0.24723	1.75607	0.159769	-0.04716
2.0777	1.40155	0.127152	0.220404
1.39801	1.20024	-0.18383	0.030264
0.769704	0.745988	-0.02449	0.084911
0.773425	0.849029	0.172174	-0.10523
0.540677	1.02374	-0.0586	0.060101
0.741983	1.37252	0.103732	0.101166
0.888247	1.20501	0.127687	0.067372
0.570614	0.643046	0.19784	-0.03091
1.2128		-0.15132	-0.03208
0.748094		0.322746	0.194739
1.05326		0.216234	-0.25495
1.47377		0.091113	0.11849
1.17179			-0.04663
0.909454			0.148326
0.706994			0.20586
0.527909			-0.11197
1.55911			-0.07507
0.901091			0.060849
0.683617			-0.03283
1.01531			0.013688
1.26901			0.164902
1.46408			0.038285
1.19858			0.036681
0.846172			0.027484
2.05836			0.275479
0.89549			-0.02941
1.74047			0.089188
1.01658			-0.05871
0.792057			-0.15239
0.863386			0.086087
0.70874			0.254839
0.454564			0.10277
1.91261			0.270773
1.7812			-0.16554
1.02251			0.112608
0.760715			-0.00374
1.16246			0.050155
0.963612			0.081809
1.68629			0.234734
0.940783			0.078815
0.708511			-0.05165
0.945127			-0.15688
1.70916			-0.00791
0.988237			-0.02941
1.29225			0.026521
1.79117			0.242969
1.01163			-0.13132
1.98336			-0.05443
0.709508			-0.06545
2.01108			0.177949
0.715752			0.030906
0.971661			0.281895
0.750558			0.08074
0.674104			0.306812
0.644658			0.086408
0.607903			-0.09689
0.99013			0.073682
0.845724			0.09368
0.975217			0.149503
0.93584			0.003636
1.67587			0.213025
0.61194			0.061598
0.879878			0.103946
0.914127			0.039568
0.743035			0.160411
0.636456			0.031654
0.517204			0.14052
			0.152176
			0.109935
			-0.01315
			0.066838
			0.082451
			0.188001

## Sheet: 6C left
Time (min)	WT_1	WT_2	WT_3	#4-6_1	#4-6_2	#4-6_3	#4-6RASA_1_1	#4-6RASA_1_2	#4-6RASA_1_3	#4-6RASA_2_1	#4-6RASA_2_2	#4-6RASA_2_3
0	0.045	0.0232	0.0146	0.0555	0.0472	0.0348	0.0672	0.0502	0.0214	0.0338	0.0498	0.0307
20	0.0229	0.0189	0.0191	0.0269	0.0239	0.0248	0.023	0.0225	0.0179	0.0138	0.0169	0.0181
40	0.026	0.0258	0.0219	0.024	0.0258	0.0248	0.0282	0.0149	0.0092	0.0105	0.013	0.0093
60	0.0219	0.0211	0.0262	0.0266	0.0251	0.0272	0.0306	0.0208	0.0191	0.0164	0.0175	0.0199
80	0.0279	0.0279	0.0278	0.0301	0.025	0.0289	0.0308	0.0257	0.0226	0.0172	0.0207	0.0197
100	0.031	0.0316	0.0353	0.0333	0.0259	0.0308	0.0328	0.0263	0.0251	0.0209	0.0227	0.0224
120	0.036	0.0372	0.0393	0.0394	0.0311	0.0347	0.0379	0.0307	0.0273	0.0237	0.0267	0.0244
140	0.0418	0.0428	0.0447	0.0443	0.0339	0.0402	0.0441	0.0359	0.0323	0.0268	0.0297	0.0287
160	0.0469	0.049	0.0505	0.0512	0.0393	0.045	0.0495	0.0408	0.0367	0.0306	0.0338	0.0317
180	0.0539	0.0554	0.0572	0.0584	0.0445	0.0505	0.055	0.0459	0.0422	0.0351	0.0384	0.0359
200	0.0623	0.0643	0.0649	0.0666	0.0505	0.0572	0.0612	0.0514	0.0481	0.0394	0.0434	0.0403
220	0.0707	0.0722	0.0731	0.0748	0.0562	0.0636	0.0678	0.0566	0.0537	0.0439	0.0485	0.0447
240	0.0804	0.0814	0.0803	0.0831	0.0616	0.0691	0.0738	0.0617	0.0594	0.049	0.0538	0.0489
260	0.0892	0.0889	0.0879	0.091	0.0668	0.0751	0.0807	0.067	0.0646	0.0535	0.0586	0.0532
280	0.0964	0.0968	0.0942	0.0983	0.0712	0.08	0.0872	0.072	0.0701	0.0578	0.0631	0.0576
300	0.1033	0.1029	0.0997	0.1044	0.0758	0.0846	0.0939	0.0771	0.0751	0.0626	0.0681	0.0618
320	0.1098	0.1084	0.1047	0.1112	0.0799	0.0887	0.1013	0.0826	0.0802	0.0674	0.0723	0.0663
340	0.1161	0.1139	0.1089	0.117	0.0833	0.0924	0.1086	0.0882	0.0862	0.072	0.0774	0.0704
360	0.1217	0.1188	0.114	0.1223	0.0869	0.0959	0.1158	0.0942	0.0922	0.0769	0.0825	0.075
380	0.1274	0.1237	0.119	0.1279	0.0904	0.0997	0.124	0.0996	0.0981	0.0821	0.0874	0.0798
400	0.1333	0.1293	0.1231	0.1331	0.0937	0.1034	0.1323	0.1065	0.1048	0.0876	0.0924	0.0845
420	0.1394	0.1332	0.1278	0.1386	0.0968	0.1066	0.1412	0.1127	0.1116	0.0928	0.0981	0.0894
440	0.1448	0.1382	0.1319	0.1425	0.0994	0.1095	0.1496	0.1187	0.119	0.0985	0.1041	0.0945
460	0.1509	0.1428	0.1363	0.1474	0.1025	0.1127	0.1577	0.1264	0.1265	0.104	0.1101	0.0996
480	0.156	0.1477	0.141	0.1517	0.105	0.1155	0.1679	0.1343	0.1338	0.1104	0.1165	0.1048
500	0.1604	0.1531	0.1451	0.1564	0.108	0.1182	0.1763	0.1412	0.1418	0.1163	0.1225	0.1106
520	0.1661	0.1578	0.1497	0.1598	0.1101	0.121	0.1861	0.1494	0.1501	0.1233	0.1294	0.1168
540	0.1707	0.163	0.1538	0.1633	0.1124	0.1232	0.1954	0.1566	0.157	0.1294	0.1365	0.1226
560	0.1769	0.1674	0.1584	0.1671	0.1147	0.1256	0.205	0.1633	0.1661	0.1364	0.143	0.1287
580	0.1828	0.171	0.1616	0.1696	0.1163	0.1277	0.2173	0.1725	0.1747	0.1429	0.1497	0.1347
600	0.1879	0.1761	0.1662	0.173	0.1189	0.1303	0.2272	0.1813	0.1838	0.1516	0.1573	0.1411
620	0.1935	0.1813	0.1705	0.1759	0.1208	0.132	0.2381	0.1889	0.1931	0.158	0.1649	0.1473
640	0.1991	0.1858	0.1745	0.1778	0.1223	0.1335	0.2495	0.1977	0.2017	0.1655	0.1728	0.1539
660	0.2035	0.1907	0.1778	0.1805	0.1241	0.1353	0.2619	0.2081	0.2117	0.175	0.1799	0.1608
680	0.2089	0.1957	0.1821	0.1826	0.126	0.1367	0.2728	0.2168	0.2218	0.1833	0.1884	0.1676
700	0.2142	0.202	0.186	0.1842	0.1277	0.1382	0.2848	0.2259	0.2313	0.1912	0.1968	0.1749
720	0.221	0.2059	0.1905	0.1864	0.1292	0.1397	0.2963	0.2351	0.242	0.1994	0.2056	0.1837
740	0.2275	0.2113	0.1951	0.1884	0.1304	0.141	0.3081	0.2459	0.2524	0.2087	0.2152	0.1912
760	0.2329	0.2158	0.1986	0.1897	0.1313	0.1424	0.3213	0.2565	0.2652	0.2181	0.2243	0.1988
780	0.2386	0.2209	0.202	0.1921	0.1321	0.1439	0.3338	0.2677	0.277	0.2283	0.2348	0.2089
800	0.2447	0.2249	0.2059	0.1939	0.1336	0.1451	0.3469	0.2793	0.288	0.2383	0.2452	0.2168
820	0.2512	0.2313	0.2104	0.1959	0.1349	0.1464	0.3608	0.2892	0.2998	0.251	0.2557	0.2256
840	0.2571	0.2358	0.2142	0.1978	0.1361	0.1476	0.3736	0.3017	0.3125	0.2614	0.2656	0.2358
860	0.2625	0.2425	0.2193	0.1997	0.137	0.1487	0.3864	0.3113	0.3238	0.2709	0.2781	0.2444
880	0.2689	0.2483	0.223	0.2004	0.1382	0.1499	0.4021	0.3246	0.3376	0.2839	0.2884	0.2562
900	0.2768	0.253	0.2287	0.202	0.1388	0.151	0.4146	0.3374	0.347	0.2954	0.299	0.2679
920	0.2834	0.2596	0.2334	0.2034	0.1397	0.1522	0.4293	0.3483	0.3633	0.3067	0.3131	0.278
940	0.291	0.2658	0.2372	0.2044	0.1406	0.1531	0.4454	0.362	0.3761	0.3187	0.3269	0.2891
960	0.2996	0.2716	0.2419	0.2059	0.141	0.154	0.4595	0.3742	0.3893	0.3315	0.3427	0.3021
980	0.3059	0.2781	0.2472	0.2071	0.1417	0.1548	0.4722	0.3864	0.4046	0.345	0.3552	0.3135
1000	0.3137	0.2854	0.2529	0.2083	0.1428	0.1557	0.4881	0.4012	0.4185	0.3583	0.3694	0.3266
1020	0.321	0.2915	0.2587	0.2092	0.1434	0.1567	0.5017	0.4123	0.4313	0.3714	0.3823	0.3381
1040	0.3292	0.2972	0.2631	0.2106	0.1445	0.1567	0.5169	0.4283	0.4472	0.388	0.3982	0.3535
1060	0.3378	0.3048	0.268	0.2118	0.1452	0.1577	0.5321	0.4405	0.4629	0.4008	0.4137	0.3681
1080	0.3452	0.3126	0.2738	0.213	0.1461	0.1582	0.5488	0.454	0.4777	0.4152	0.4286	0.3829
1100	0.3547	0.3204	0.2806	0.214	0.1473	0.159	0.5613	0.4666	0.4901	0.4261	0.4438	0.394
1120	0.3646	0.3285	0.2844	0.2171	0.1475	0.1597	0.5777	0.4826	0.5094	0.445	0.4604	0.4108
1140	0.3736	0.3362	0.2923	0.2173	0.1488	0.1606	0.5913	0.4967	0.5227	0.457	0.4749	0.4221
1160	0.3848	0.3448	0.2997	0.2185	0.149	0.1611	0.6057	0.5136	0.5396	0.4731	0.4914	0.4409
1180	0.3948	0.3527	0.3073	0.2194	0.1499	0.1618	0.6209	0.526	0.5539	0.4887	0.5074	0.4557
1200	0.4049	0.3636	0.313	0.2205	0.1506	0.1618	0.6401	0.5397	0.5696	0.5028	0.5213	0.4722
1220	0.4148	0.3702	0.3221	0.2214	0.1513	0.1624	0.654	0.5539	0.5826	0.5181	0.536	0.4844
1240	0.4241	0.3781	0.3314	0.2231	0.1529	0.1637	0.6704	0.5686	0.5955	0.5313	0.5532	0.4996
1260	0.4361	0.3876	0.3374	0.224	0.1534	0.1641	0.6839	0.5823	0.6113	0.5459	0.5697	0.5147
1280	0.4489	0.3983	0.3455	0.2256	0.1543	0.1651	0.6969	0.5992	0.63	0.5628	0.5864	0.5318
1300	0.4601	0.4076	0.3543	0.2266	0.1555	0.166	0.7069	0.6131	0.6439	0.5802	0.6001	0.5451
1320	0.4733	0.4207	0.3623	0.2289	0.1558	0.1663	0.7134	0.6297	0.6624	0.597	0.6184	0.5653
1340	0.4831	0.4297	0.3724	0.23	0.1577	0.1673	0.7177	0.6396	0.6742	0.6102	0.6324	0.5773
1360	0.4969	0.4406	0.3787	0.232	0.1579	0.1679	0.7237	0.648	0.6925	0.6245	0.6489	0.5947
1380	0.5101	0.4485	0.3912	0.2334	0.1595	0.1692	0.725	0.653	0.7049	0.629	0.6651	0.6097
1400	0.5229	0.4606	0.4013	0.2343	0.1603	0.1698	0.7277	0.6553	0.7146	0.6372	0.6765	0.6263
1420	0.5372	0.4718	0.4107	0.2361	0.1612	0.1706	0.7294	0.6578	0.7205	0.6416	0.6858	0.6442
1440	0.5522	0.488	0.4194	0.2382	0.1623	0.1714	0.7324	0.6637	0.7285	0.6479	0.6932	0.6584
1460	0.5653	0.4967	0.4318	0.2395	0.1637	0.1724	0.7322	0.6637	0.7308	0.6474	0.6969	0.6648
1480	0.5798	0.5096	0.441	0.241	0.1649	0.1734	0.7335	0.6653	0.7335	0.6499	0.7001	0.6701
1500	0.5971	0.5282	0.4495	0.2433	0.166	0.1738	0.7342	0.6691	0.7373	0.655	0.7032	0.6786
1520	0.6094	0.5385	0.4652	0.2449	0.1676	0.1751	0.7332	0.6667	0.7382	0.6535	0.7066	0.6791
1540	0.624	0.5514	0.4757	0.2469	0.1689	0.1759	0.734	0.6669	0.7383	0.6557	0.707	0.6825
1560	0.6419	0.5649	0.4887	0.2492	0.1701	0.1765	0.7357	0.6688	0.7404	0.6583	0.7089	0.6848
1580	0.6581	0.5853	0.4988	0.2514	0.1714	0.1774	0.7372	0.6706	0.7416	0.6612	0.71	0.6878
1600	0.672	0.5949	0.5133	0.2524	0.1729	0.1786	0.7366	0.6681	0.7403	0.6586	0.7126	0.6862
1620	0.6875	0.6141	0.5251	0.2541	0.1739	0.1794	0.7384	0.6701	0.7435	0.6627	0.7137	0.6894
1640	0.6983	0.6229	0.5424	0.2563	0.1755	0.1807	0.7394	0.669	0.7428	0.6611	0.714	0.6878
1660	0.7067	0.6405	0.5563	0.2587	0.1763	0.1818	0.7392	0.6696	0.7437	0.6595	0.7145	0.6911
1680	0.7149	0.6622	0.568	0.2619	0.178	0.1825	0.7407	0.6722	0.7454	0.6631	0.7156	0.6939
1700	0.7188	0.6697	0.5838	0.2634	0.1794	0.1838	0.7392	0.671	0.7432	0.6606	0.7155	0.6938
1720	0.7245	0.6917	0.595	0.2658	0.181	0.1846	0.7406	0.6738	0.7447	0.6632	0.7152	0.6961
1740	0.7267	0.706	0.6108	0.2685	0.1824	0.1861	0.7417	0.6745	0.7459	0.6631	0.7161	0.6962
1760	0.7285	0.7113	0.6298	0.2705	0.1843	0.1876	0.741	0.6731	0.7424	0.6617	0.717	0.6944
1780	0.7299	0.7235	0.6455	0.2727	0.1856	0.1892	0.7405	0.6727	0.744	0.6613	0.718	0.6953
1800	0.7324	0.7391	0.6586	0.2758	0.188	0.1896	0.7426	0.675	0.7464	0.6644	0.7184	0.698
1820	0.7332	0.7435	0.6751	0.2783	0.19	0.191	0.7425	0.6756	0.7467	0.6661	0.7185	0.698
1840	0.733	0.7424	0.6944	0.281	0.1914	0.1929	0.7418	0.6736	0.7455	0.6647	0.7181	0.6962
1860	0.7346	0.7447	0.7102	0.2837	0.1931	0.1949	0.742	0.6724	0.7464	0.6638	0.719	0.6962
1880	0.7337	0.7482	0.7281	0.288	0.1943	0.1963	0.7426	0.6722	0.7474	0.6645	0.7181	0.6971
1900	0.7332	0.7492	0.7437	0.2911	0.1966	0.1977	0.7441	0.6733	0.748	0.6655	0.7187	0.6976
1920	0.7354	0.7558	0.7509	0.294	0.1984	0.1985	0.7442	0.6753	0.75	0.6686	0.7192	0.6988
1940	0.7336	0.7502	0.7631	0.2966	0.2004	0.201	0.7432	0.6744	0.7485	0.6652	0.7191	0.6965
1960	0.7339	0.7575	0.7671	0.3011	0.2031	0.2019	0.7441	0.6774	0.7503	0.6676	0.719	0.6986
1980	0.7331	0.7513	0.7748	0.3047	0.2049	0.2038	0.7451	0.6763	0.749	0.6663	0.7186	0.6977
2000	0.7334	0.7516	0.7793	0.3079	0.2073	0.2057	0.7459	0.6772	0.7492	0.6667	0.7187	0.6983
2020	0.7343	0.7523	0.783	0.3124	0.2095	0.2072	0.7458	0.6776	0.7495	0.6669	0.7183	0.6989
2040	0.7337	0.7519	0.7854	0.315	0.2118	0.2086	0.7456	0.6781	0.7493	0.6677	0.7199	0.698
2060	0.7349	0.7587	0.7847	0.3199	0.2147	0.2103	0.7474	0.6796	0.7515	0.6701	0.7198	0.7005
2080	0.7346	0.7526	0.7885	0.3238	0.2167	0.2124	0.7471	0.679	0.7504	0.6671	0.7199	0.6993
2100	0.7344	0.7587	0.7853	0.3291	0.2195	0.2132	0.7483	0.6812	0.7528	0.6712	0.7205	0.7024
2120	0.736	0.7582	0.786	0.3336	0.2224	0.2166	0.7487	0.6805	0.7528	0.6705	0.721	0.702
2140	0.736	0.7522	0.79	0.3382	0.2241	0.2188	0.7483	0.6798	0.752	0.6682	0.7211	0.7002
2160	0.7366	0.7601	0.7865	0.3447	0.228	0.2208	0.7498	0.6815	0.7549	0.6713	0.7213	0.7028

## Sheet: 6C right
WT_ben	#4-6RASA_1_ben	#4-6RASA_ben_2
590.139	450.981	449.433
621.321	483.893	422.736
617.497	461.419	436.845

## Sheet: 6D
WT_1	WT_2	#4-6_1	#4-6_2	#4-6RASA_1	#4-6RASA_2
139.43	130.091	143.553	140.079	214.868	175.63
135.844	132.147	143.621	131.627	208.325	164.948
139.495	138.405	128.262	138.087	199.358	178.547
131.054	144.379	132.147	160.122	194.715	157.196
				241.597	171.527

## Sheet: 6E
WT	#4-6	#4-6RASA
5.8651	76.1478	0
2.05339	44.0529	0
5.464	97.95	0
3.73134	216.374	0
3.73134	211.538	0
3.83632	123.194	0
0.750751	135.246	0
		0
		0
		0.0017

## Sheet: 6F bottom middle
Ask1-C	Ndc80-C	Ndc80_C, #4-6RASA
0.9214	0.0909	0.9807
	0.1126	0.9207

## Sheet: 6F bottom right
Ndc80-C_DMSO	Ndc80_C_Rap	Ndc80-C_#4-6RASA_DMSO	Ndc80-C_#4-6RASA_Rap
180.799	171.429	171.919	231.74
185.135	177.494	172.807	237.405
175.835	177.389	163.514	239.483
171.821	177.494	155.651	230.498
173.705	178.124	169.213	224.649
173.304	178.759	162.543	229.794
167.611	157.69	179.827	228.746
161.583	148.877	173.304	195.728
162.543	151.423	146.772	212.442
155.893		152.112
