# Supplementary material for: The copy-number and varied strengths of MELT motifs in Spc105 balance the strength and responsiveness of the spindle assembly checkpoint
Source: eLife. 2020 Jun 1;9:e55096. doi: 10.7554/eLife.55096 (PMC7292645; doi:10.7554/eLife.55096)
Supplement: Supplementary file 4. [file elife-55096-supp4.mlapp › metadata/mwcorePropertiesExtension.xml]

<?xml version="1.0" encoding="UTF-8" standalone="yes" ?><mwcoreProperties xmlns="http://schemas.mathworks.com/package/2014/corePropertiesExtension"><matlabVersion>9.7.0.1183724</matlabVersion><uuid>b198ae08-23cd-422c-a0de-d185bed57126</uuid></mwcoreProperties>
