# Supplementary material for: The copy-number and varied strengths of MELT motifs in Spc105 balance the strength and responsiveness of the spindle assembly checkpoint
Source: eLife. 2020 Jun 1;9:e55096. doi: 10.7554/eLife.55096 (PMC7292645; doi:10.7554/eLife.55096)
Supplement: Supplementary file 4. [file elife-55096-supp4.mlapp › metadata/mwcorePropertiesReleaseInfo.xml]

<?xml version="1.0" encoding="UTF-8"?>
<!-- Version information for MathWorks R2019b Release -->
<MathWorks_version_info>
  <version>9.7.0.1190202</version>
  <release>R2019b</release>
  <description></description>
  <date>Aug 21 2019</date>
  <checksum>2952055408</checksum>
</MathWorks_version_info>
