# Supplementary material for: The copy-number and varied strengths of MELT motifs in Spc105 balance the strength and responsiveness of the spindle assembly checkpoint
Source: eLife. 2020 Jun 1;9:e55096. doi: 10.7554/eLife.55096 (PMC7292645; doi:10.7554/eLife.55096)
Supplement: Supplementary file 5. [file elife-55096-supp5.mlapp]

Archive with 9 entries (9 files):
- metadata/appMetadata.xml
- metadata/coreProperties.xml
- metadata/mwcoreProperties.xml
- metadata/mwcorePropertiesExtension.xml
- metadata/mwcorePropertiesReleaseInfo.xml
- [Content_Types].xml
- _rels/.rels
- appdesigner/appModel.mat
- matlab/document.xml
