# Supplementary material for: The copy-number and varied strengths of MELT motifs in Spc105 balance the strength and responsiveness of the spindle assembly checkpoint
Source: eLife. 2020 Jun 1;9:e55096. doi: 10.7554/eLife.55096 (PMC7292645; doi:10.7554/eLife.55096)
Supplement: Supplementary file 5. [file elife-55096-supp5.mlapp › metadata/mwcorePropertiesExtension.xml]

<?xml version="1.0" encoding="UTF-8" standalone="yes" ?><mwcoreProperties xmlns="http://schemas.mathworks.com/package/2014/corePropertiesExtension"><matlabVersion>9.8.0.1259625</matlabVersion><uuid>aeecba42-5b03-4ef6-b0ac-f768e36ab99f</uuid></mwcoreProperties>
