# Supplementary material for: The copy-number and varied strengths of MELT motifs in Spc105 balance the strength and responsiveness of the spindle assembly checkpoint
Source: eLife. 2020 Jun 1;9:e55096. doi: 10.7554/eLife.55096 (PMC7292645; doi:10.7554/eLife.55096)
Supplement: Supplementary file 5. [file elife-55096-supp5.mlapp › metadata/mwcorePropertiesReleaseInfo.xml]

<?xml version="1.0" encoding="UTF-8"?>
<!-- Version information for MathWorks R2020a Release -->
<MathWorks_version_info>
  <version>9.8.0.1262005</version>
  <release>R2020a</release>
  <description>Prerelease</description>
  <date>Nov 27 2019</date>
  <checksum>1049028111</checksum>
</MathWorks_version_info>
